# Supplementary material
Source: publisher figshare collection journal article supplement (https://tandf.figshare.com/ndownloader/files/15460829)
Supplement: Supplementary file 1 [file 15460829]

Support of the article

**Features of transformations in REE-containing systems of nitrate precursors in preparatory processes of formation of multifunctional oxide materials**

*O. Dryuchko, D. Storozhenko, A. Vigdorchik, N. Bunyakina, I. Ivanytska, K. Kytaihora, V. Khaniukov*

*Poltava National Technical Yuri Kondratyuk University, Pervomaysky prospect, Poltava, 36011, Ukraine,*

*e-mail:* [*dog.chemistry@gmail.com*](mailto:dog.chemistry@gmail.com)

**Abstract.**

The complex study provides a reliable idea of ​​the trends in the joint behavior of structural components in the water-salt systems of nitrate precursors of REE, alkaline, alkaline earth metals in the preparatory stages of the processes of forming multicomponent oxide polyfunctional materials on their basis with thermal activation. Stages of such transformations are revealed; The regularities of complex and phase formation in systems and factors influencing them are determined; A number of physicochemical properties of the intermediate phases formed - coordination lanthanides nitrates: their composition, types of compounds, atomic-crystalline structure, regularities of transformations during heat treatment were studied.

**Keywords**: rare earth elements, alkaline metals, alkaline earth metals, nitrates, complex formation, water-salt systems.

**Formation of multifunctional oxide materials**

Відомості про авторів / About the Authors

***Дрючко Олександр Григорович*** ­– кандидат хімічних наук, доцент, Полтавський національний технічний університет імені Юрія Кондратюка, доцент кафедри хімії, тел. (095) 773-02-95; e-mail: dog.chemistry@gmail.com;

***Dryuchko* Oleksandr Grigorovich** – Candidate of Chemical Sciences (Ph. D.), Docent, Poltava National Technical Yuri Kondratyuk University, Associate Professor of the Department of Chemistry, tel. (095) 773-02-95; e-mail: dog.chemistry@ gmail.com;

***Стороженко Дмитро Олексійович*** ­– кандидат хімічних наук, доцент, Полтавський національний технічний університет імені Юрія Кондратюка, завідувач кафедри хімії, тел. (095) 773-02-95; e-mail: storchem 31415S@gmail.com;

**Storozhenko Dmytro Oleksiyovych** – Candidate of Chemical Sciences (Ph. D.), Docent, Poltava National Technical Yuri Kondratyuk University, Head of the Department of Chemistry, tel. (095) 773-02-95; e-mail: storchem [31415S@gmail.com](mailto:31415S@gmail.com).

***Вігдорчик Ася Герцівна*** – кандидат хімічних наук, доцент, Полтавський національний технічний університет імені Юрія Кондратюка, доцент кафедри хімії, тел. (095) 773-02-95; e-mail: dog.chemistry@gmail.com;

***Vigdorchik Asya Hertsivna*** – Candidate of Chemical Sciences (Ph. D.), Docent, Poltava National Technical Yuri Kondratyuk University, Associate Professor of the Department of Chemistry, tel. (095) 773-02-95; e-mail: dog.chemistry@ gmail.com.

***Бунякіна Наталія Володимирівна*** ­– кандидат хімічних наук, доцент, Полтавський національний технічний університет імені Юрія Кондратюка, доцент кафедри хімії, тел. (095) 773-02-95; e-mail: [n.bunyakina@gmail.com;](mailto:n.bunyakina@gmail.com;%0D)

**Bunyakina Natalia Volodymyrivna** – Candidate of Chemical Sciences (Ph. D.), Docent, Poltava National Technical Yuri Kondratyuk University, Associate Professor of the Department of Chemistry, tel. (095) 773-02-95; e-mail:[n.bunyakina@gmail.com.](mailto:n.bunyakina@gmail.com.%0D)

***Іваницька Ірина Олександрівна*** ­– кандидат хімічних наук, доцент, Полтавський національний технічний університет імені Юрія Кондратюка, декан гуманітарного факультету, тел. (095) 773-02-95; e-mail: irina.ivanytska@gmail.com;

**Ivanytska*****Iryna Oleksandrivna*** – Candidate of Chemical Sciences (Ph. D.), Docent, Poltava National Technical Yuri Kondratyuk University, Dean of the Faculty of Humanities, tel. (095) 773-02-95; e-mail:[irina.ivanytska@gmail.com](mailto:irina.ivanytska@gmail.com).

**Китайгора Катерина Олегівна** – студентка, Полтавський національний технічний університет імені Юрія Кондратюка, Першотравневий проспект, 24, Полтава, 36011, Україна; тел. (095) 773-02-95; e-mail: [katerynakytaih@gmail.com](mailto:katerynakytaih@gmail.com);

**Kytaihora Kateryna Olegivna** – student, Poltava National Technical Yuri Kondratyuk University, 24, Pervomaysky prospect, Poltava, 36011, Ukraine, tel. (095) 773-02-95; e-mail: [katerynakytaih@gmail.com](mailto:katerynakytaih@gmail.com).

**Ханюков Василь Олександрович** – студент, Полтавський національний технічний університет імені Юрія Кондратюка, Першотравневий проспект, 24, Полтава, 36011, Україна; тел. (095) 773-02-95; e-mail: khaniukovv@gmail.com;

**Khaniukov Vasyl Oleksandrovych**– student, Poltava National Technical Yuri Kondratyuk University, 24, Pervomaysky prospect, Poltava, 36011, Ukraine, tel. (095) 773-02-95; e-mail: [khaniukovv@gmail.com](mailto:khaniukovv@gmail.com)

**References**

1. Mazurenko, E. A., Gerasemchuk, A. I., Trunova, E. K. et al. (2004). *Ukr. chem. journal*., 70(7), 32.

[Google Scholar]

2. Belous A. G. (2009). *Ukr. chem. journal.*, 75(7), 3.

[Google Scholar]

3.Zhang, Q., Schmidt, N., Lan, J. et al.(2014). *Chem. Com.*, 50, 5593.

[Google Scholar]

4. Gavrilenko, O. M., Pashkova, O. V., Bіlous, A. G. (2005). *Ukr. chem. journal*, 71(8), 73.

[Google Scholar]

5.Fortal'nova, E. A., Gavrilenko, O. N., Belous, A. G. et al.(2008). *Ros. chem. journal.* LII(5), 43.

[Google Scholar]

6. Belous, A. G. (2008). *Ukr. chem. Journal*, 74(1), 3.

[Google Scholar]

7. *Pat.* 2440292 S 2 RU, C 01 B 3/18 Method for obtaining perovskites. Yakovleva, I. S., Isupova, L. A. (RU) – publ. 2012.

[Google Scholar]

8. Varma, A., Mukasyan, A. S., Rogachev, A. S. et al. (2016). *American Chemical Society. Chem. Rev.*, 116, 14493.

[Google Scholar]

9. [Schaak](https://pubs.acs.org/author/Schaak%2C+Raymond+E), R. E.,[Mallouk](https://pubs.acs.org/author/Mallouk%2C+Thomas+E), T. E. (2002). *Chemistry of Materials*, 14(4), 1455.

[Google Scholar]

10. Rodionov, I. A., Siljukov, O. I., Zvereva, I. A. (2012). *Journal of General Chemistry*, 4, 548.

[Google Scholar]

11*.*Anosov, V. Ya., Ozerova, M. I., Fialkov, Yu.Ya*.* (1976). *Basics of Physical and Chemical Analysis.* Мoscov, Nauka Publ. – 503 p.

12. Goroshchenko, Ya. G.(1978). *Physical and Chemical Analysis of homogenous and heterogenous systems*. Kiev*,* Naukova dumka Publ. – 490 p.

13. Storozhenko, D. O., Dryuchko, O. G., Bunyakina*,* N. V. et al. (2015). *Innovations in Corrosion and Materials Science*., 5(2), 80.

[Google Scholar]

14. Busev, A. I., Titstova, V. G,, Ivanov, V. М. (1978). *Manual on Analytical Chemistry of Rare Elements*. – Moscow: Chemistry. – 432 p.

15. Kreshkov, A. P. (1976). *Fundamentals of analytical chemistry. Quantitative analysis*. - Moscow: Chemistry, book. 2. – 480 p.

16. Vigdorchik, А. G., Malinovskiy, Yu. А., Dryuchko, А. G. et al.(1991). *Crystallography*, 36(6), 1395.

[Google Scholar]

17. Vigdorchik, А. G., Malinovskiy, Yu. А., Dryuchko, А. G. et al.(1990). *Proceedings of the USSR Academy of Sciences. Inorganic materials.* 26(11), 2357.

[Google Scholar]

18.Vigdorchik, А. G., Malinovskiy, Yu. А., Dryuchko, А. G. et al.(1992). *Crystallography*, 37(4), 882.

[Google Scholar]

19. Vigdorchik, A. G., Malinovskij, Ju. A., Drjuchko, A. G. (1989). *Journal of structural* *chemistry*. 30(6), 152.

[Google Scholar]

20. Vigdorchik, А. G., Malinovskiy, Yu. А., Dryuchko, А. G. (1989). *Crystallography*, 34(6), 1434.

[Google Scholar]

21. Vigdorchik, А. G., Malinovskiy, Yu. А., Dryuchko, А. G. et al.(1992). *Crystallography*, 37(6), 1449.

[Google Scholar]

22.Vigdorchik, А. G., Malinovskiy, Yu. А., Dryuchko, А. G. et al.(1988). *Crystallography*, 33(3), 613.

[Google Scholar]

23. Vigdorchik, A. G., Malinovskij, Ju. A., Drjuchko, A. G. (1991). *Journal of structural* *chemistry*. 32(3), 26.

[Google Scholar]

24. Vigdorchik, А. G., Malinovskiy, Yu. А., Dryuchko, А. G. (1990). *Crystallography*, 35(6), 1395.

[Google Scholar]

25. Vigdorchik, А. G., Malinovskiy, Yu. А., Dryuchko, А. G. (1990). *Crystallography*, 35(6), 1399.

[Google Scholar]

26. Vigdorchik, A. G., Malinovskij, Ju. A., Drjuchko, A. G. (1989). *Crystallography*. 34(2), 292.

[Google Scholar]

27. Vigdorchik, A. G., Malinovskij, Ju. A., Drjuchko, A. G. (1989). *Journal of structural* *chemistry*. 30(5), 175.

[Google Scholar]

28. Vigdorchik, A. G., Malinovskij, Ju. A., Drjuchko, A. G. (1989). *Crystallography*. 34(6), 1396.

[Google Scholar]

29. Eriksson, B., Larrson, L. O., Niinisto L. et al. (1980). *Acta Chem. Scand.,* A 34(8), 567.

[Google Scholar]

30. Carnall, W. T., Siegel, S., Ferraro, J. R. et al. (1973). *Inorg. Chem*., 12(3), 560.

[Google Scholar]

31. Anderson, M. R., Jenkin, G. T., White, J. W.(1977). *Acta crystallogr.,* 33(12), 3933.

[Google Scholar]

32. Kudrenko, E. O., Shmyt'ko, Y. M., Strukova, H. K. (2008). *Physics of a rigid body*, 50(5), 924.

[Google Scholar]

Table 1. Conditions of the formation and composition* of compounds crystallizing in the water-salt systems of nitrate Yttrium, REE and alkali metals (25–100 оС)

| М/REЕ | Y | La | Ce | Pr | Nd | Pm | Sm | Eu | Gd | Tb | Dy | Ho | Er | Tm | Yb | Lu |
| --- | --- | --- | --- | --- | --- | --- | --- | --- | --- | --- | --- | --- | --- | --- | --- | --- |
| Li | еut.  25-100 | 3:2:4  100 | 3:2:4  100 | 3:2:4  100 | 3:2:4  65-100 | _ | еut.  25-100 | _ | еut.  25-100 | еut.  25-100 | еut.  25-100 | еut.  25-100 | еut.  25-100 | еut.  25-100 | еut.  25-100 | еut.  25-100 |
| Na | еut.  25-50 | 2:1:1  25-100 | 2:1:1  25-100 | 2:1:1  50-100 | 2:1:1  50-100 | _ | 2:1:1  100 | _ | еut.  25-100 | еut.  25-100 | еut.  25-100 | еut.  25-100 | еut.  25-100 | еut.  25-100 | еut.  25-100 | еut.  25-100 |
| K | 1:1:2  50-100 | 2:1:2  25-50  3:2:1  100 | 2:1:2  25-50  3:2:1  100 | 2:1:2  25-50  3:2:1  50-100 | 2:1:2  25-50  3:2:1  50-100 | _ | 3:2:1  50-100 | _ | 1:1:2  50-100 | 1:1:2  50-100 | 1:1:2  50-100 | 1:1:2  50-100 | 1:1:2  50-100 | 1:1:2  50-100 | 1:1:2  50-100 | 1:1:2  50-100 |
| Rb | 1:1:3  25-50 | 2:1:4  25-100  3:2:1  50-100 | 2:1:4  25-100  3:2:1  50-100 | 5:2:1  25-50  3:2:1  50-100 | 5:2:1  25-50  3:2:1  50-100 | _ | 5:2:1  50-100  3:2:1  50-100 | _ | 1:1:3  25-50 | 1:1:3  25-50 | 1:1:3  25-50 | 1:1:3  25-50 | 1:1:3  25-50 | 1:1:3  25-50 | 1:1:3  25-50 | 1:1:3  25-50 |
| Cs | 1:1:3  25-50 | 2:1:2  25-50 | 2:1:2  25-50 | 2:1:2  25-100  1:1:3  50-65 | 2:1:2  25-100  1:1:3  50-65 | _ | 1:1:3  50-65 | _ | 1:1:3  25-50 | 1:1:3  25-50 | 1:1:3  25-50 | 1:1:3  25-50 | 1:1:3  25-50 | 1:1:3  25-50 | 1:1:3  25-50 | 1:1:3  25-50 |

Note: * In the graph of the ratio of components, the first digit indicates the number of molecules of alkali metal nitrate; second - rare-earth nitrate, Y; the third - water.

Table 2. Conditions of formation and composition of compounds formed in water-salt systems of
rare-earth metals of cerium subgroup and IIA elements of periodic system (25–65 оС)

| e2Me2+\ Ln3+ | La | Ce | Pr | Nd | Pm | Sm | Eu |
| --- | --- | --- | --- | --- | --- | --- | --- |
| Mg | 3 : 2 : 24  25–65 | 3 3 : 2 : 24  25–65 | 3 : 2 : 24  25–65 | 33 : 2 : 24  25–65 | – | 33 : 2 : 24  25–65 | – |
| Ca | eut.  < 42;  > 42  metastable state | eut.  < 42;  > 42 metastable state | eut.  < 42;  > 42  metastable state | eut.  < 42;  > 42  metastable state | – | eut.  < 42;  > 42 metastable state | – |
| Sr | eut.  25–65 | eut.  25–65 | eut.  25–65 | eut.  25–65 | – | eut.  25–65 | – |
| Ba | eut.  25–65 | eut.  25–65 | eut.  25–65 | eut.  25–65 | – | eut.  25–65 | – |

Note: * In the graph of the ratio of components, the first digit indicates the number of molecules of magnesium nitrate; second – rare-earth nitrate; the third – water.

Table 3. Wave numbers (cm-1) of absorption bands in IR spectra of coordination nitrates Nd

| Newly formed compounds | Assignment | | | | | | | | | | |
| --- | --- | --- | --- | --- | --- | --- | --- | --- | --- | --- | --- |
| γ H2O | ν4(A1)(C2υ, O2NO) | ν4(B2)(C2υ, O2NO) | ν2(B1)(C2υ, O2NO) | ν1(A1)(C2υ, O2NO) | ν3(A1)(C2υ, O2NO) | ν3(B2)(C2υ, O2NO) | δ H2O | ν1(A1′ ) + ν4(E′ )  (D3h, NO3-) | ν H2O | ∆ν3 = ν3(B2)–ν3(A1) |
| Li3[Nd2(NO3)9]∙3H2O | 570-645 | 720 | 750 | 820 | 1045  1055 | 1320 | 1520 | 1645 | 1760  1800 | 3200-3600 | 200 |
| Na2[Nd(NO3)5]∙H2O | 570-650 | 722 | 750 | 817 | 1050 | 1325 | 1525 | 1640 | 1760  1795 | 3200-3600 | 200 |
| K2[Nd(NO3)5(H2O)2] | 570-680 | 720 | 750 | 820 | 1045  1055 | 1315 | 1520 | 1665 | 1760  1795 | 3200-3600 | 205 |
| K3[Nd2(NO3)9]∙H2O | – | 730 | 750 | 820 | 1050 | 1315  1335 | 1520 | 1665 | 1765  1800 | 3200-3600 | 205 |
| Rb5[Nd2(NO3)11]∙H2O | 580-660 | 730 | 750 | 820 | 1045  1055 | 1315 | 1520 | 1640 | 1760  1800 | 3200-3600 | 205 |
| Rb3[Nd2(NO3)9]∙H2O | – | 730 | 750 | 820 | 1050 | 1315  1335 | 1525 | 1665 | 1760  1800 | 3200-3600 | 210 |
| Cs2[Nd(NO3)5(H2O)2] | 570-645 | 720 | 745 | 820 | 1045  1055 | 1310 | 1520 | 1640 | 1760  1800 | 3200-3600 | 210 |
| Cs[Nd(NO3)4(H2O)3] | 570-650 | 718 | 745 | 820 | 1045 | 1310 | 1520 | 1640 | 1760  1800 | 3200-3600 | 210 |
| Nd(NO3)3·6H2O | 600-680 | 720 | 750 | 820 | 1045 | 1320 | 1460 | 1630  1665 | 1760  1790 | 3200-3600 | 140 |

Table 4. Influence of the type of symmetry on the possibility of occurrence of physical properties in crystals of coordination nitrates of rare earth elements

| Connections | Sononia | Point group | Spatial group | Properties | Temperature range of formation, ºC | The nature of solubility | References |
| --- | --- | --- | --- | --- | --- | --- | --- |
| Li3[Ln2(NO3)9·3H2O  La – La–Sm | cubic | 23 | P213 | 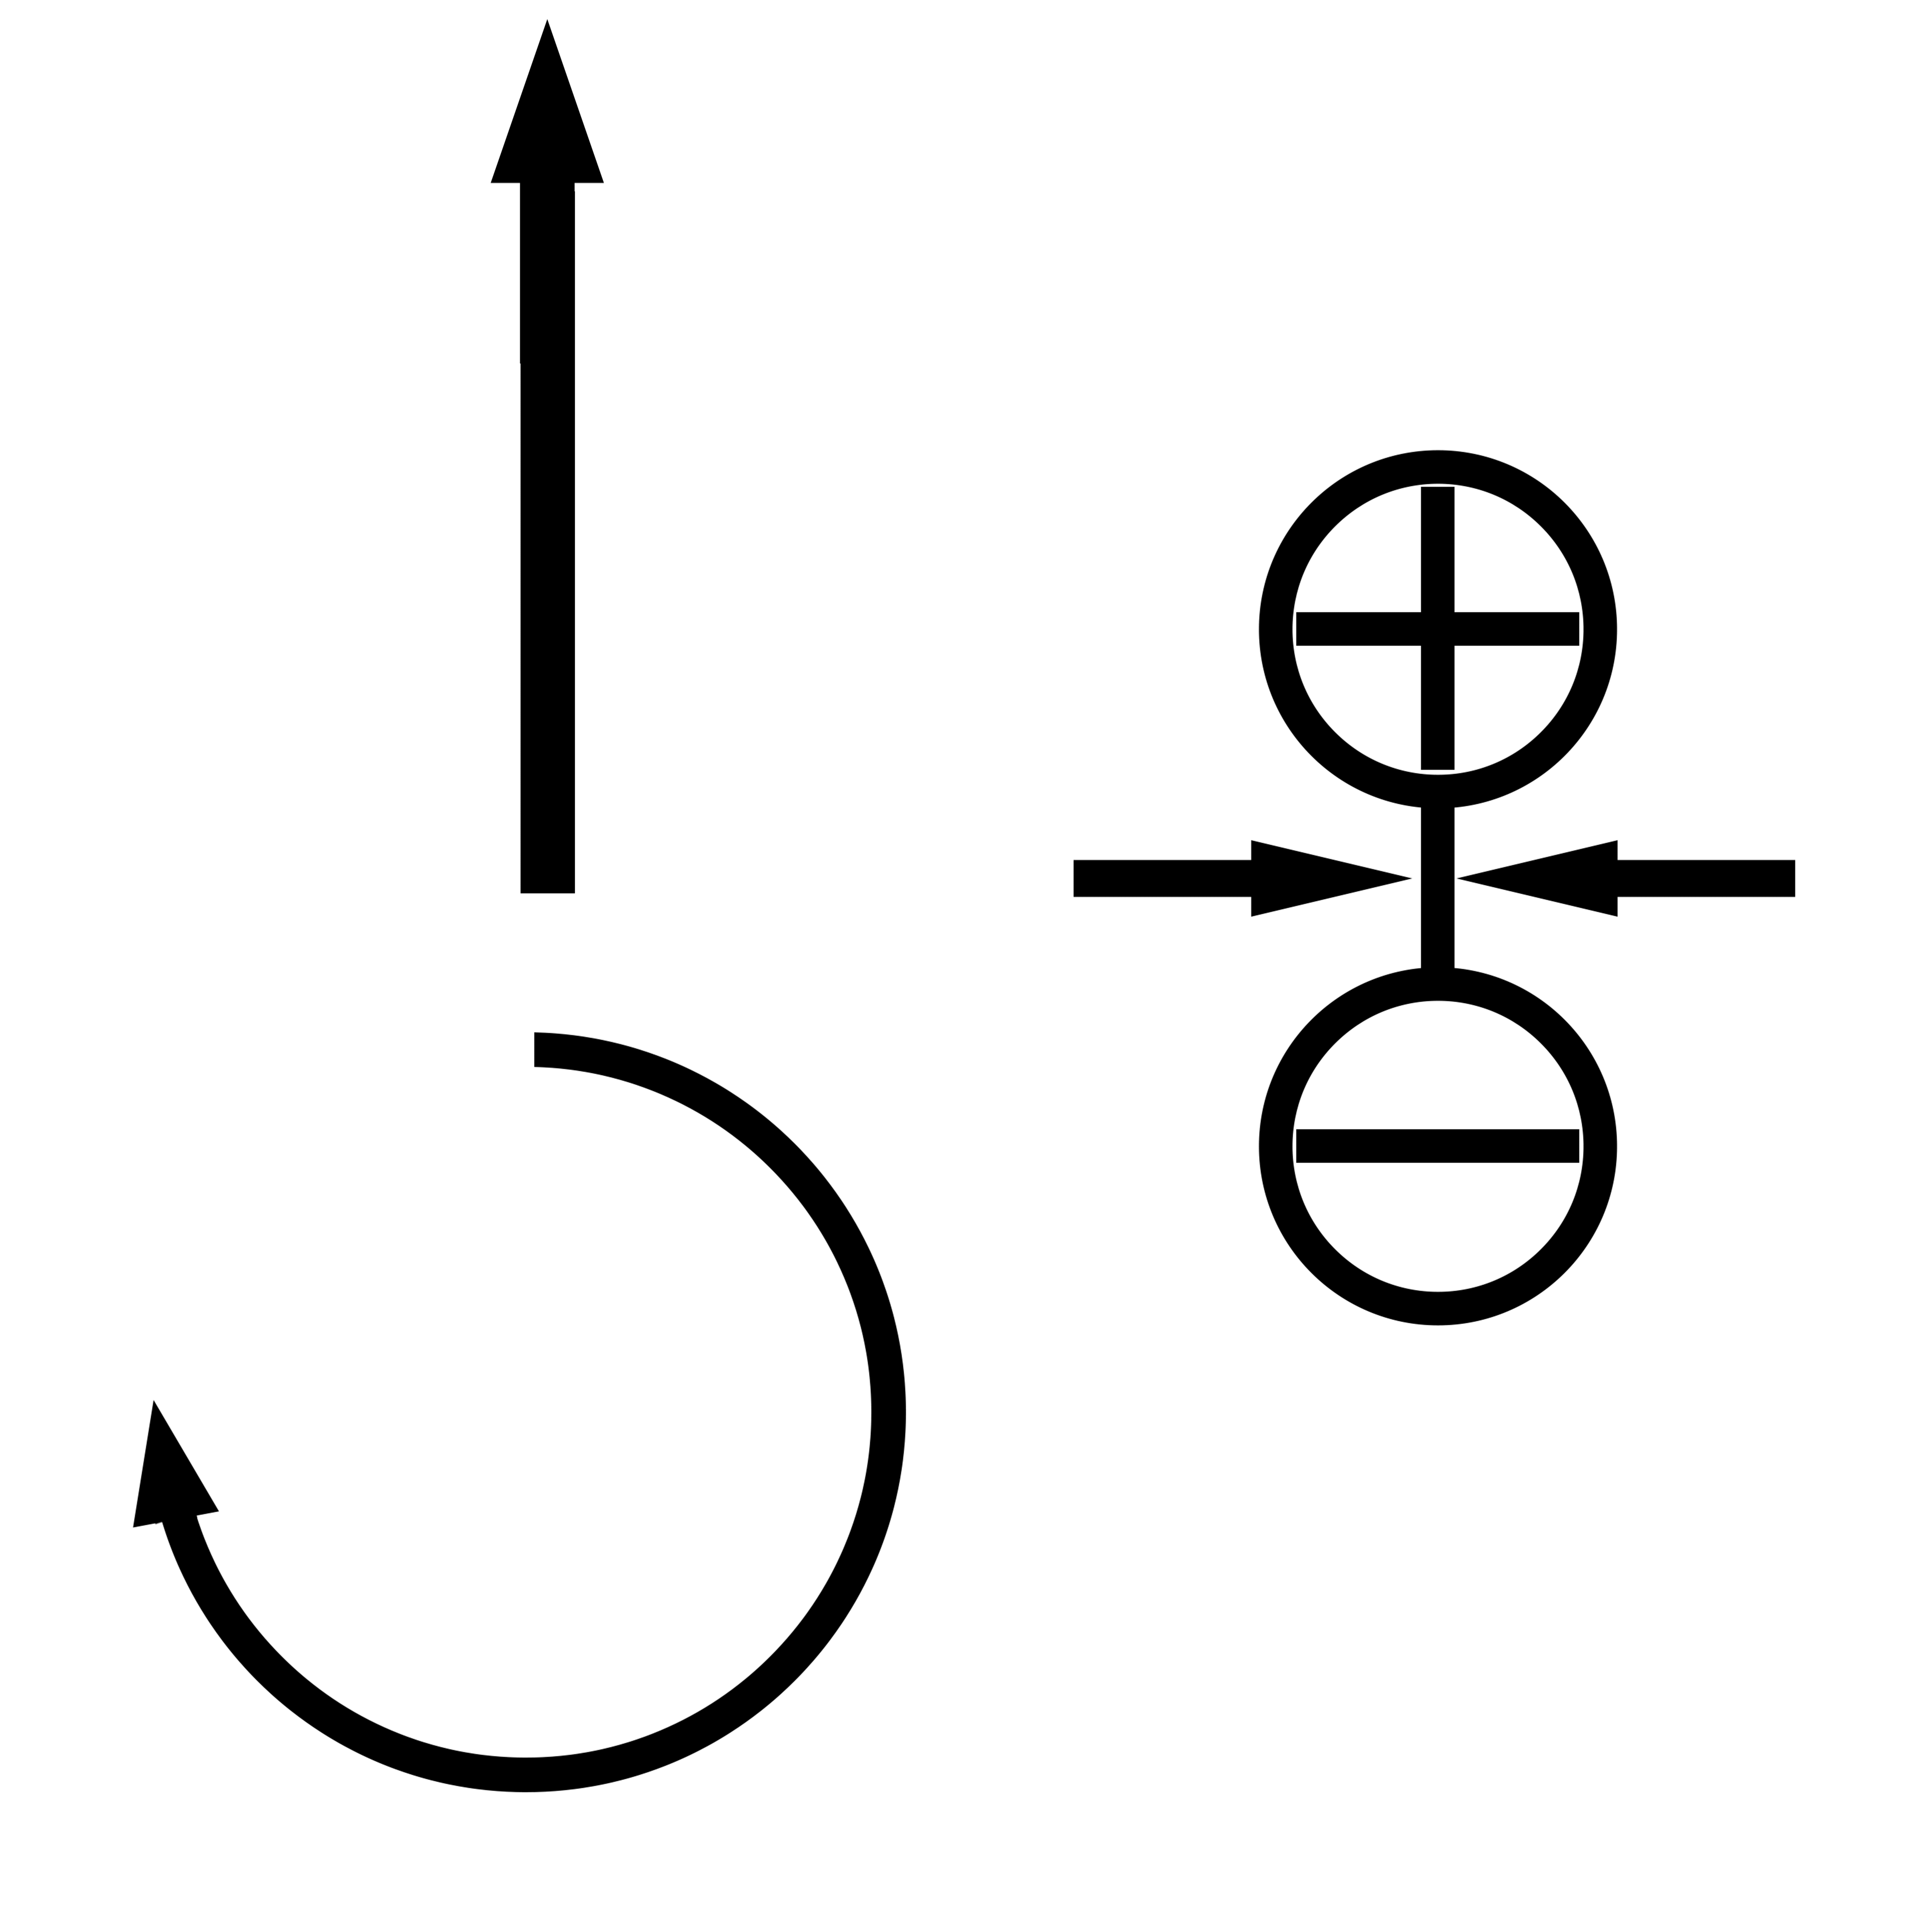 | 65-100 | congr. | [16] |
| Na2[Ln(NO3)5]·H2O  La – La–Sm | monocl. | 2/m | P21/a | 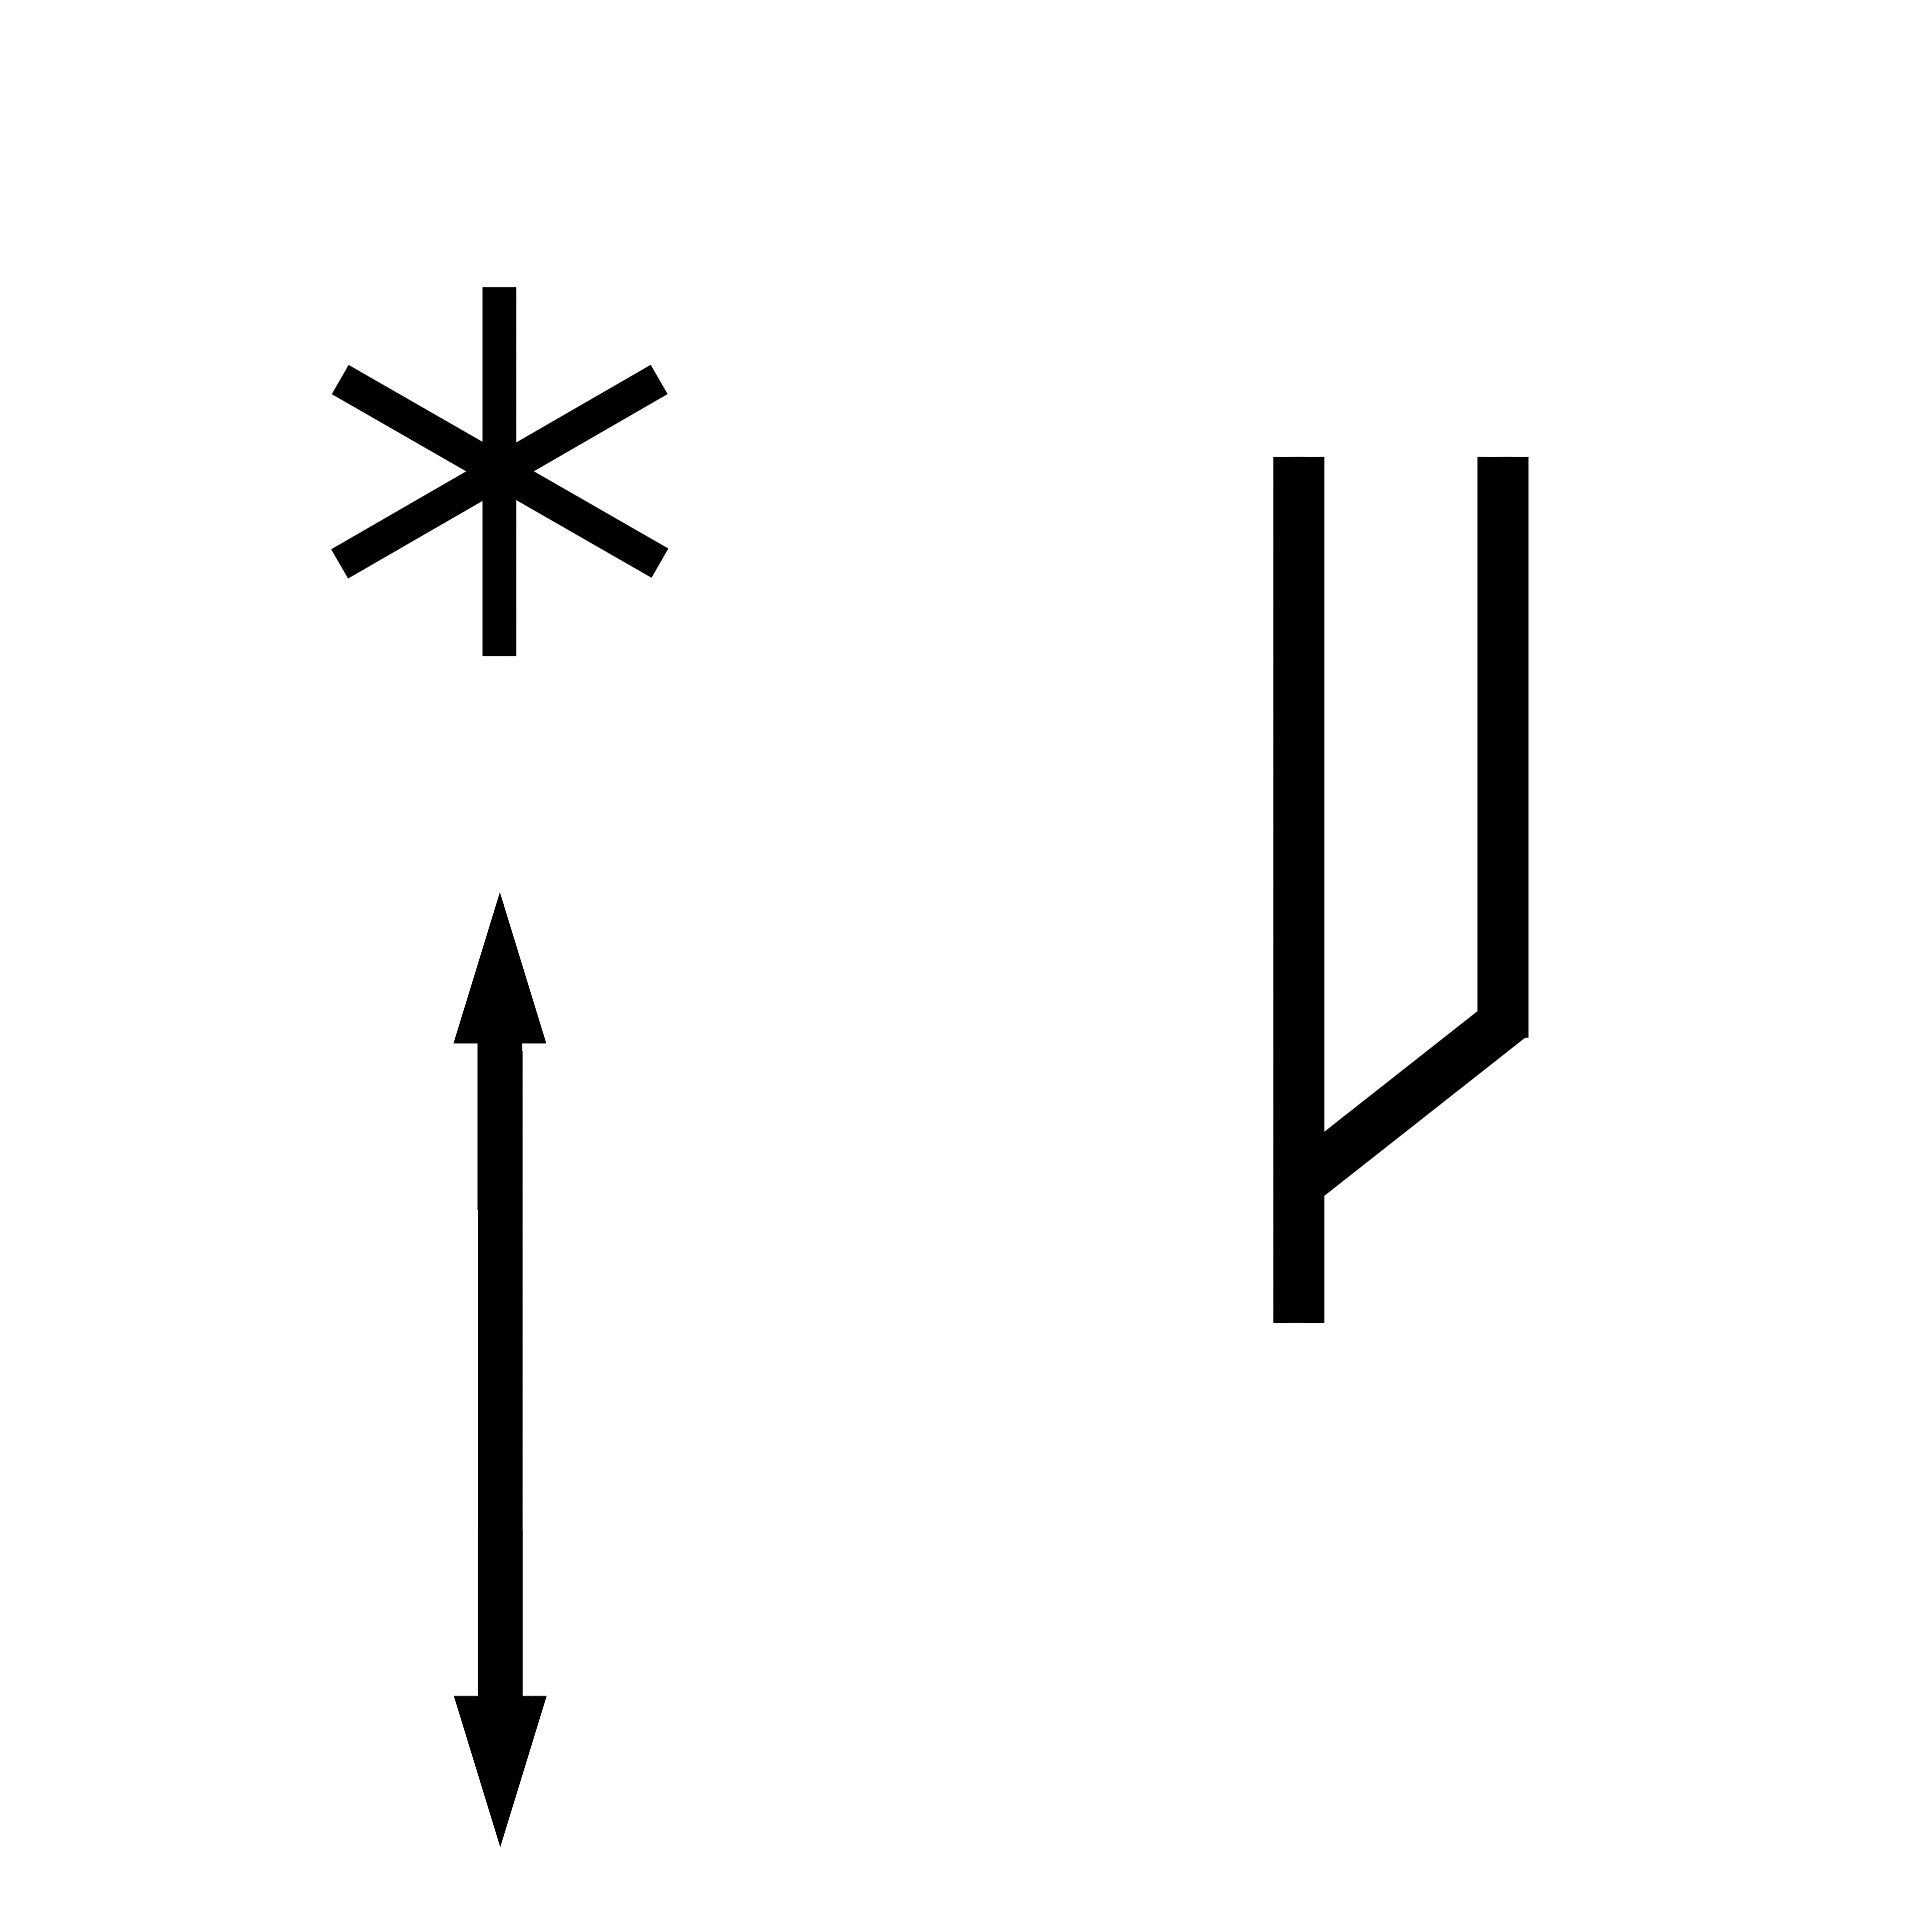 | 50-100 | incongr. | [17] |
| M3[Ln2(NO3)9]  M – K, Rb, NH4+  La – La–Sm | cubic | 432 | P4332 | 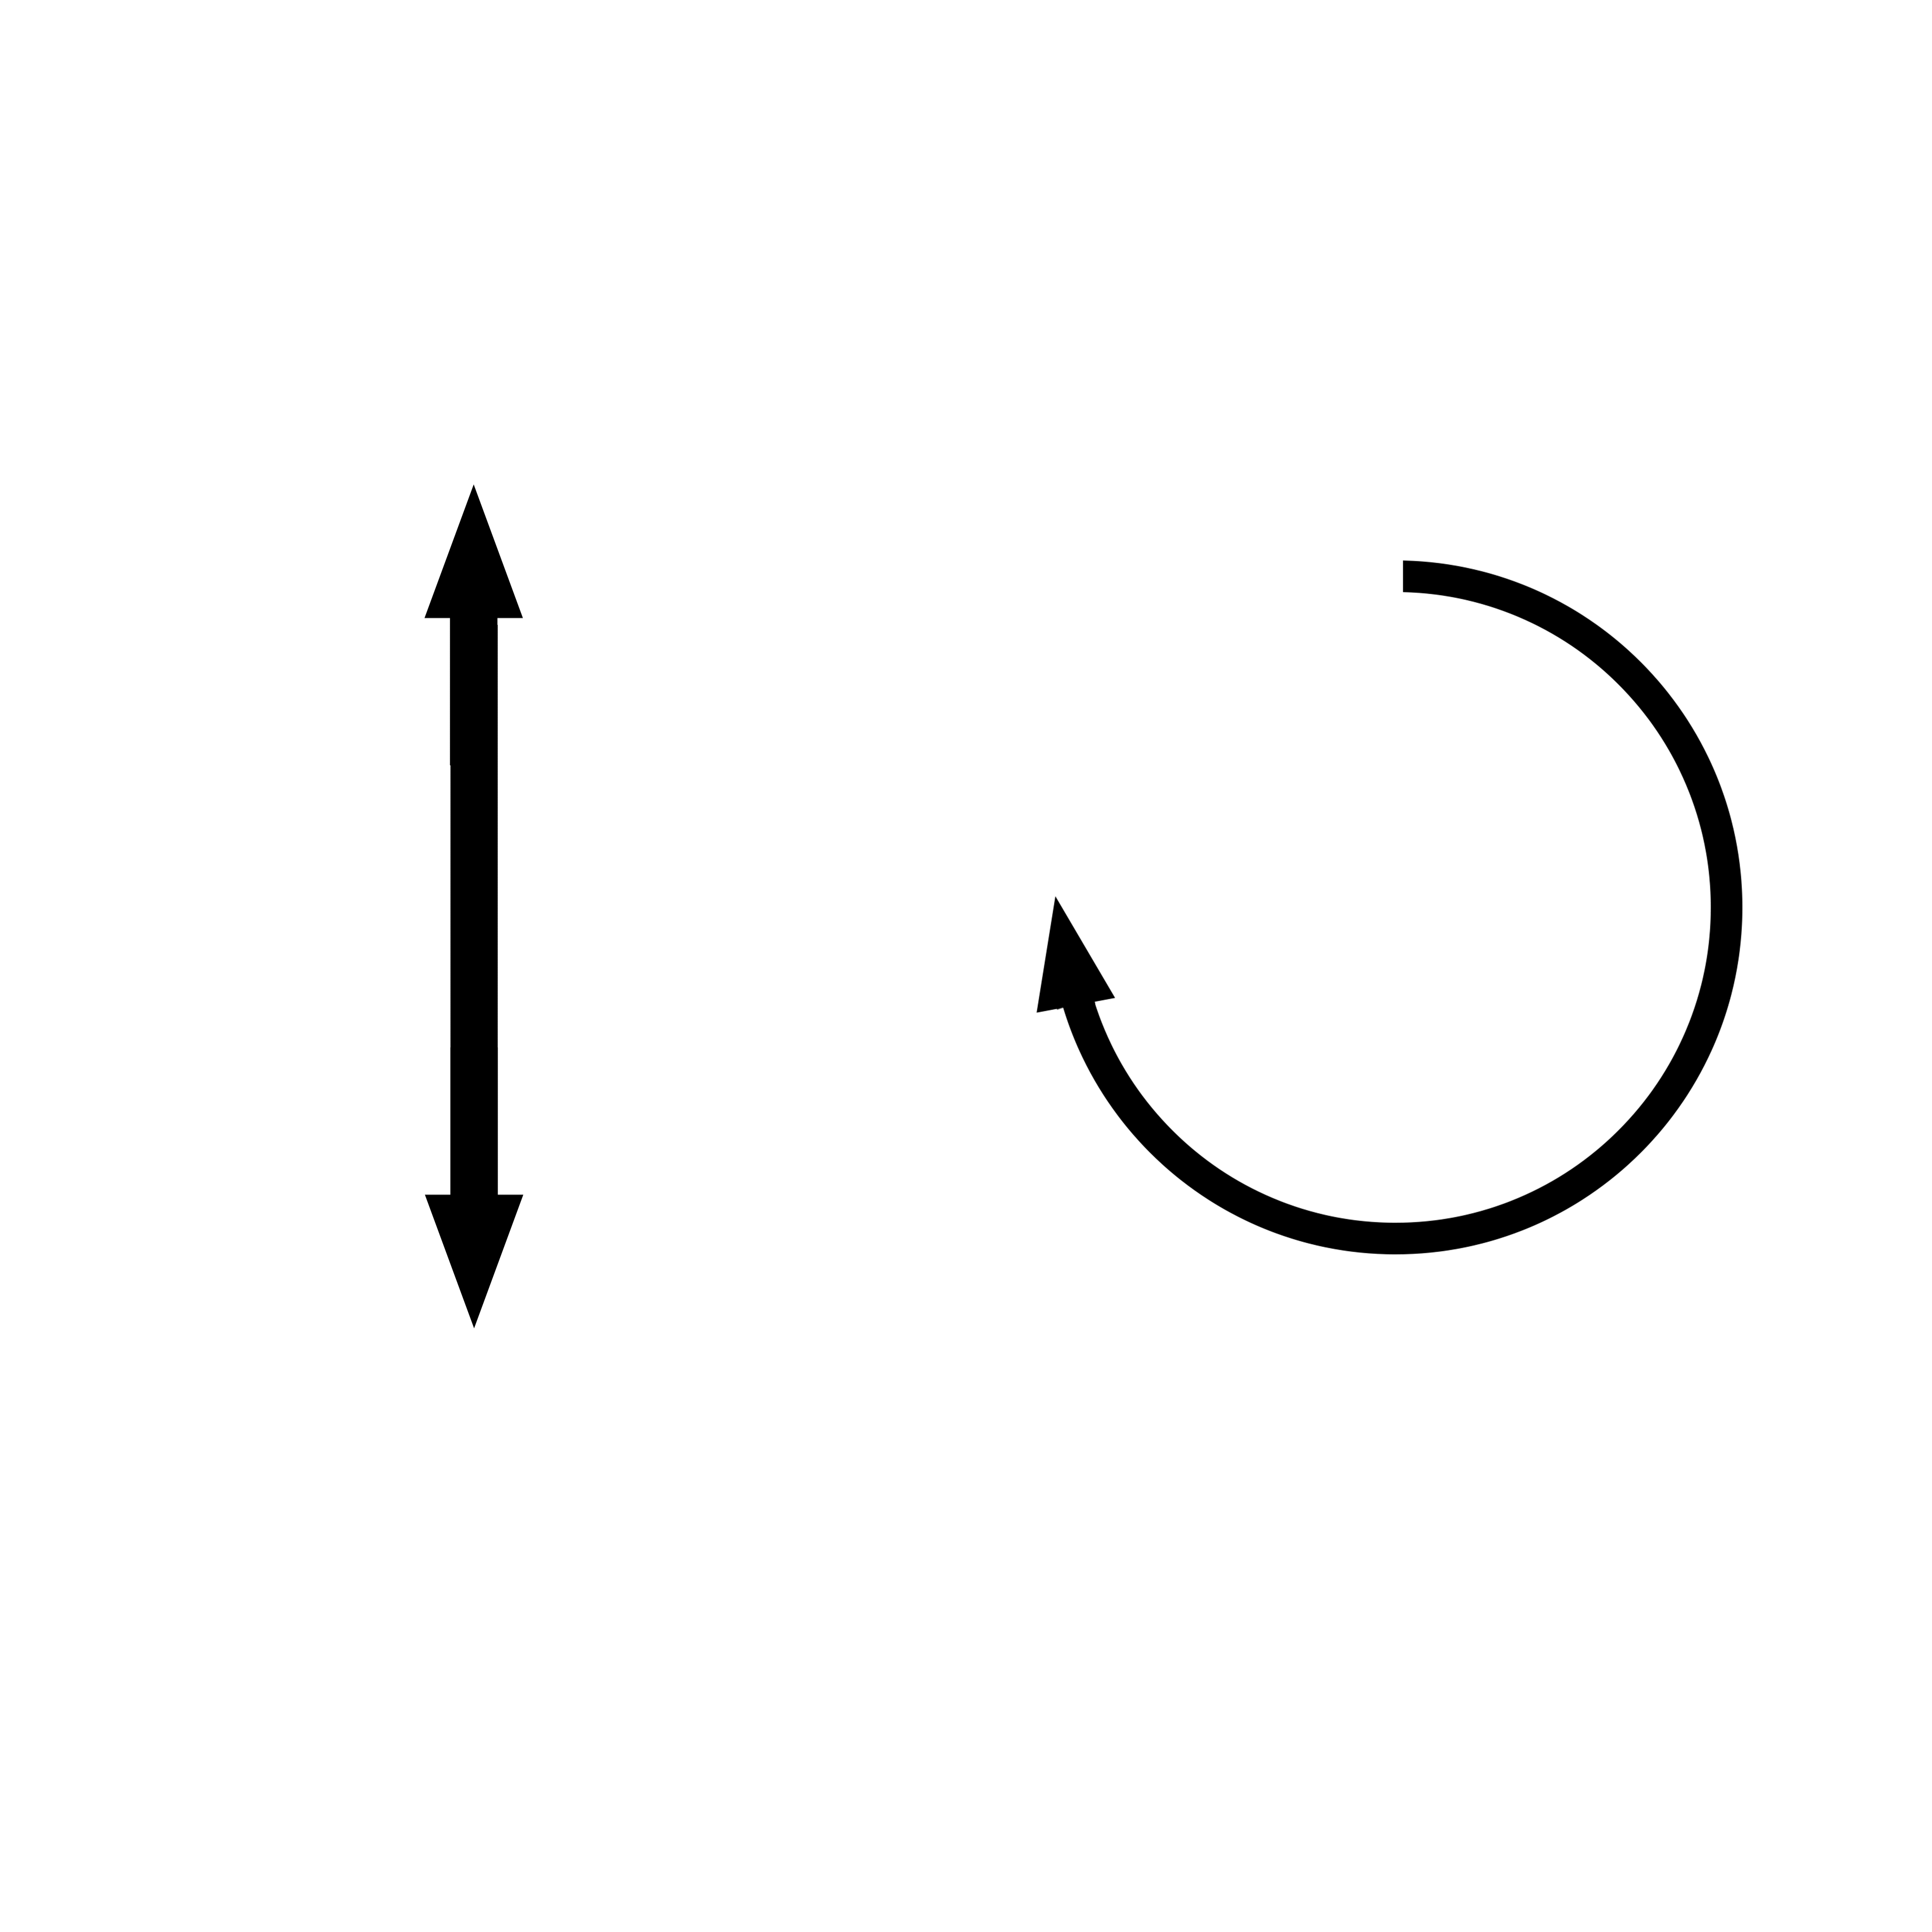 | 50–100 | congr. | [18, 19] |
| K2[Ln(NO3)5 (H2O)2]  La – La–Sm | rhombic | mm2 | Fdd2 | 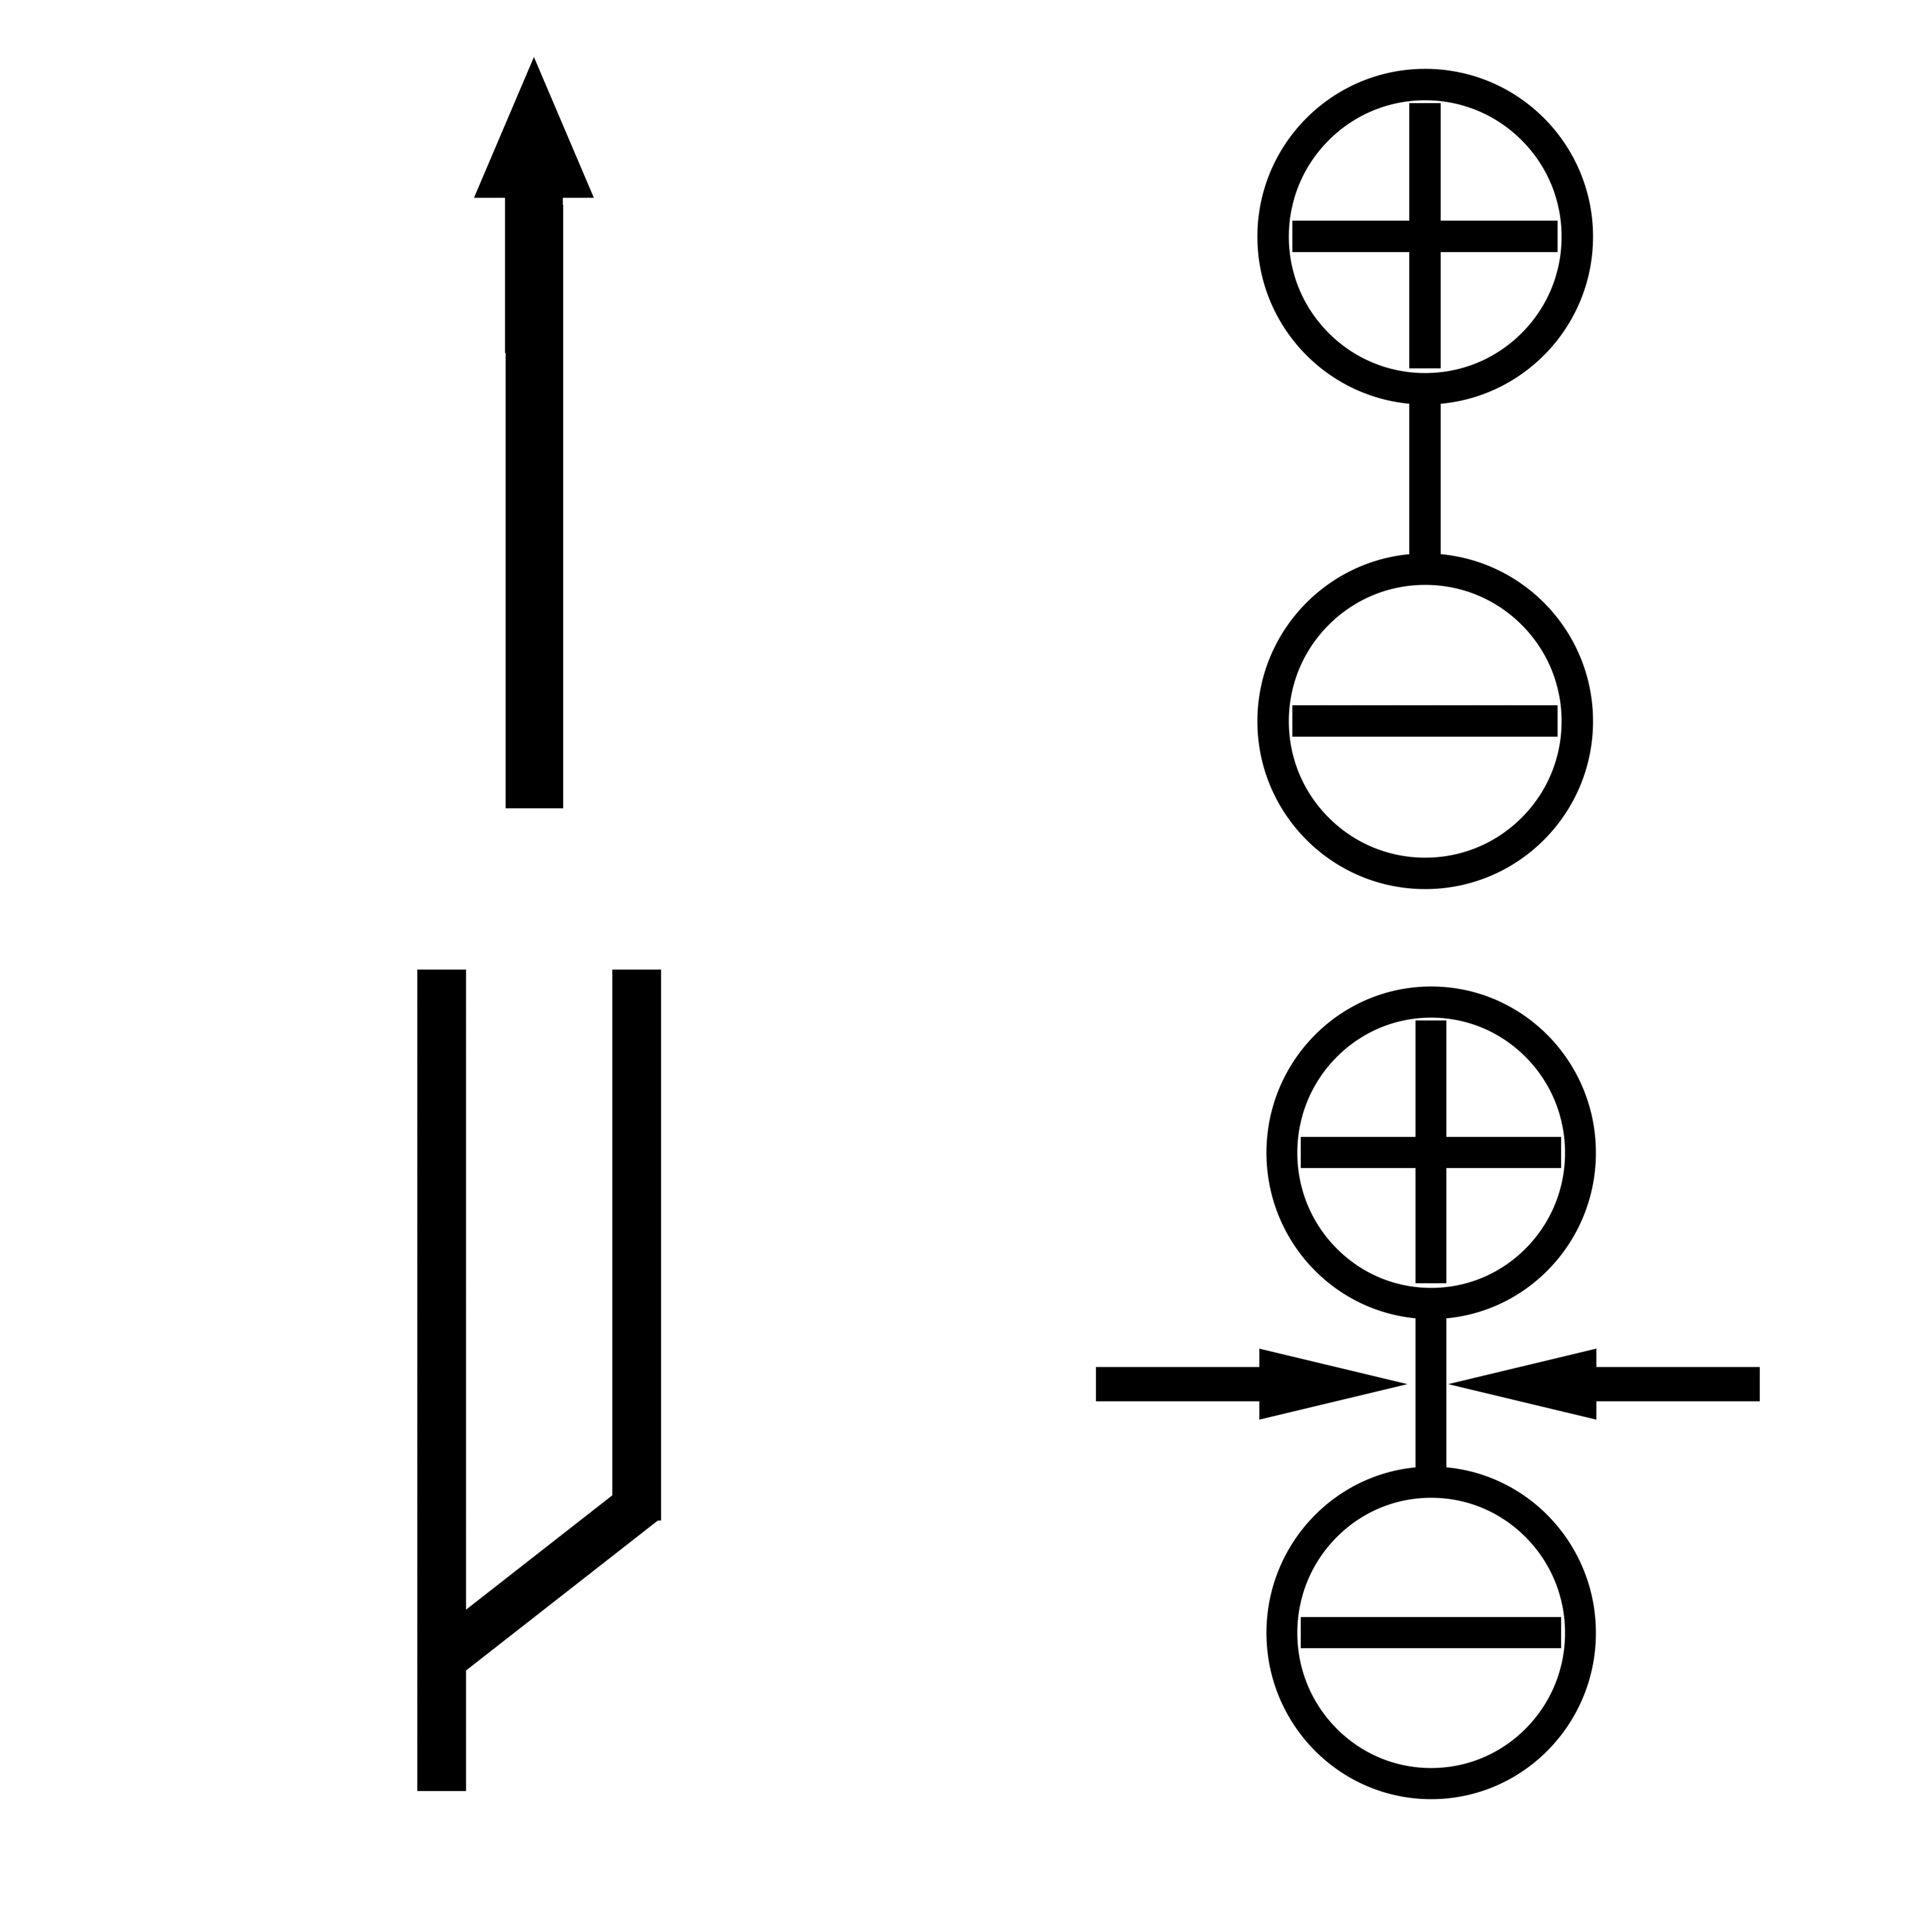 | 50 | incongr. | [18] |
| K[Ln(NO3)4(H2O)2]  Ln – Y, Gd–Lu | rhombic | mm2 | P21cn | 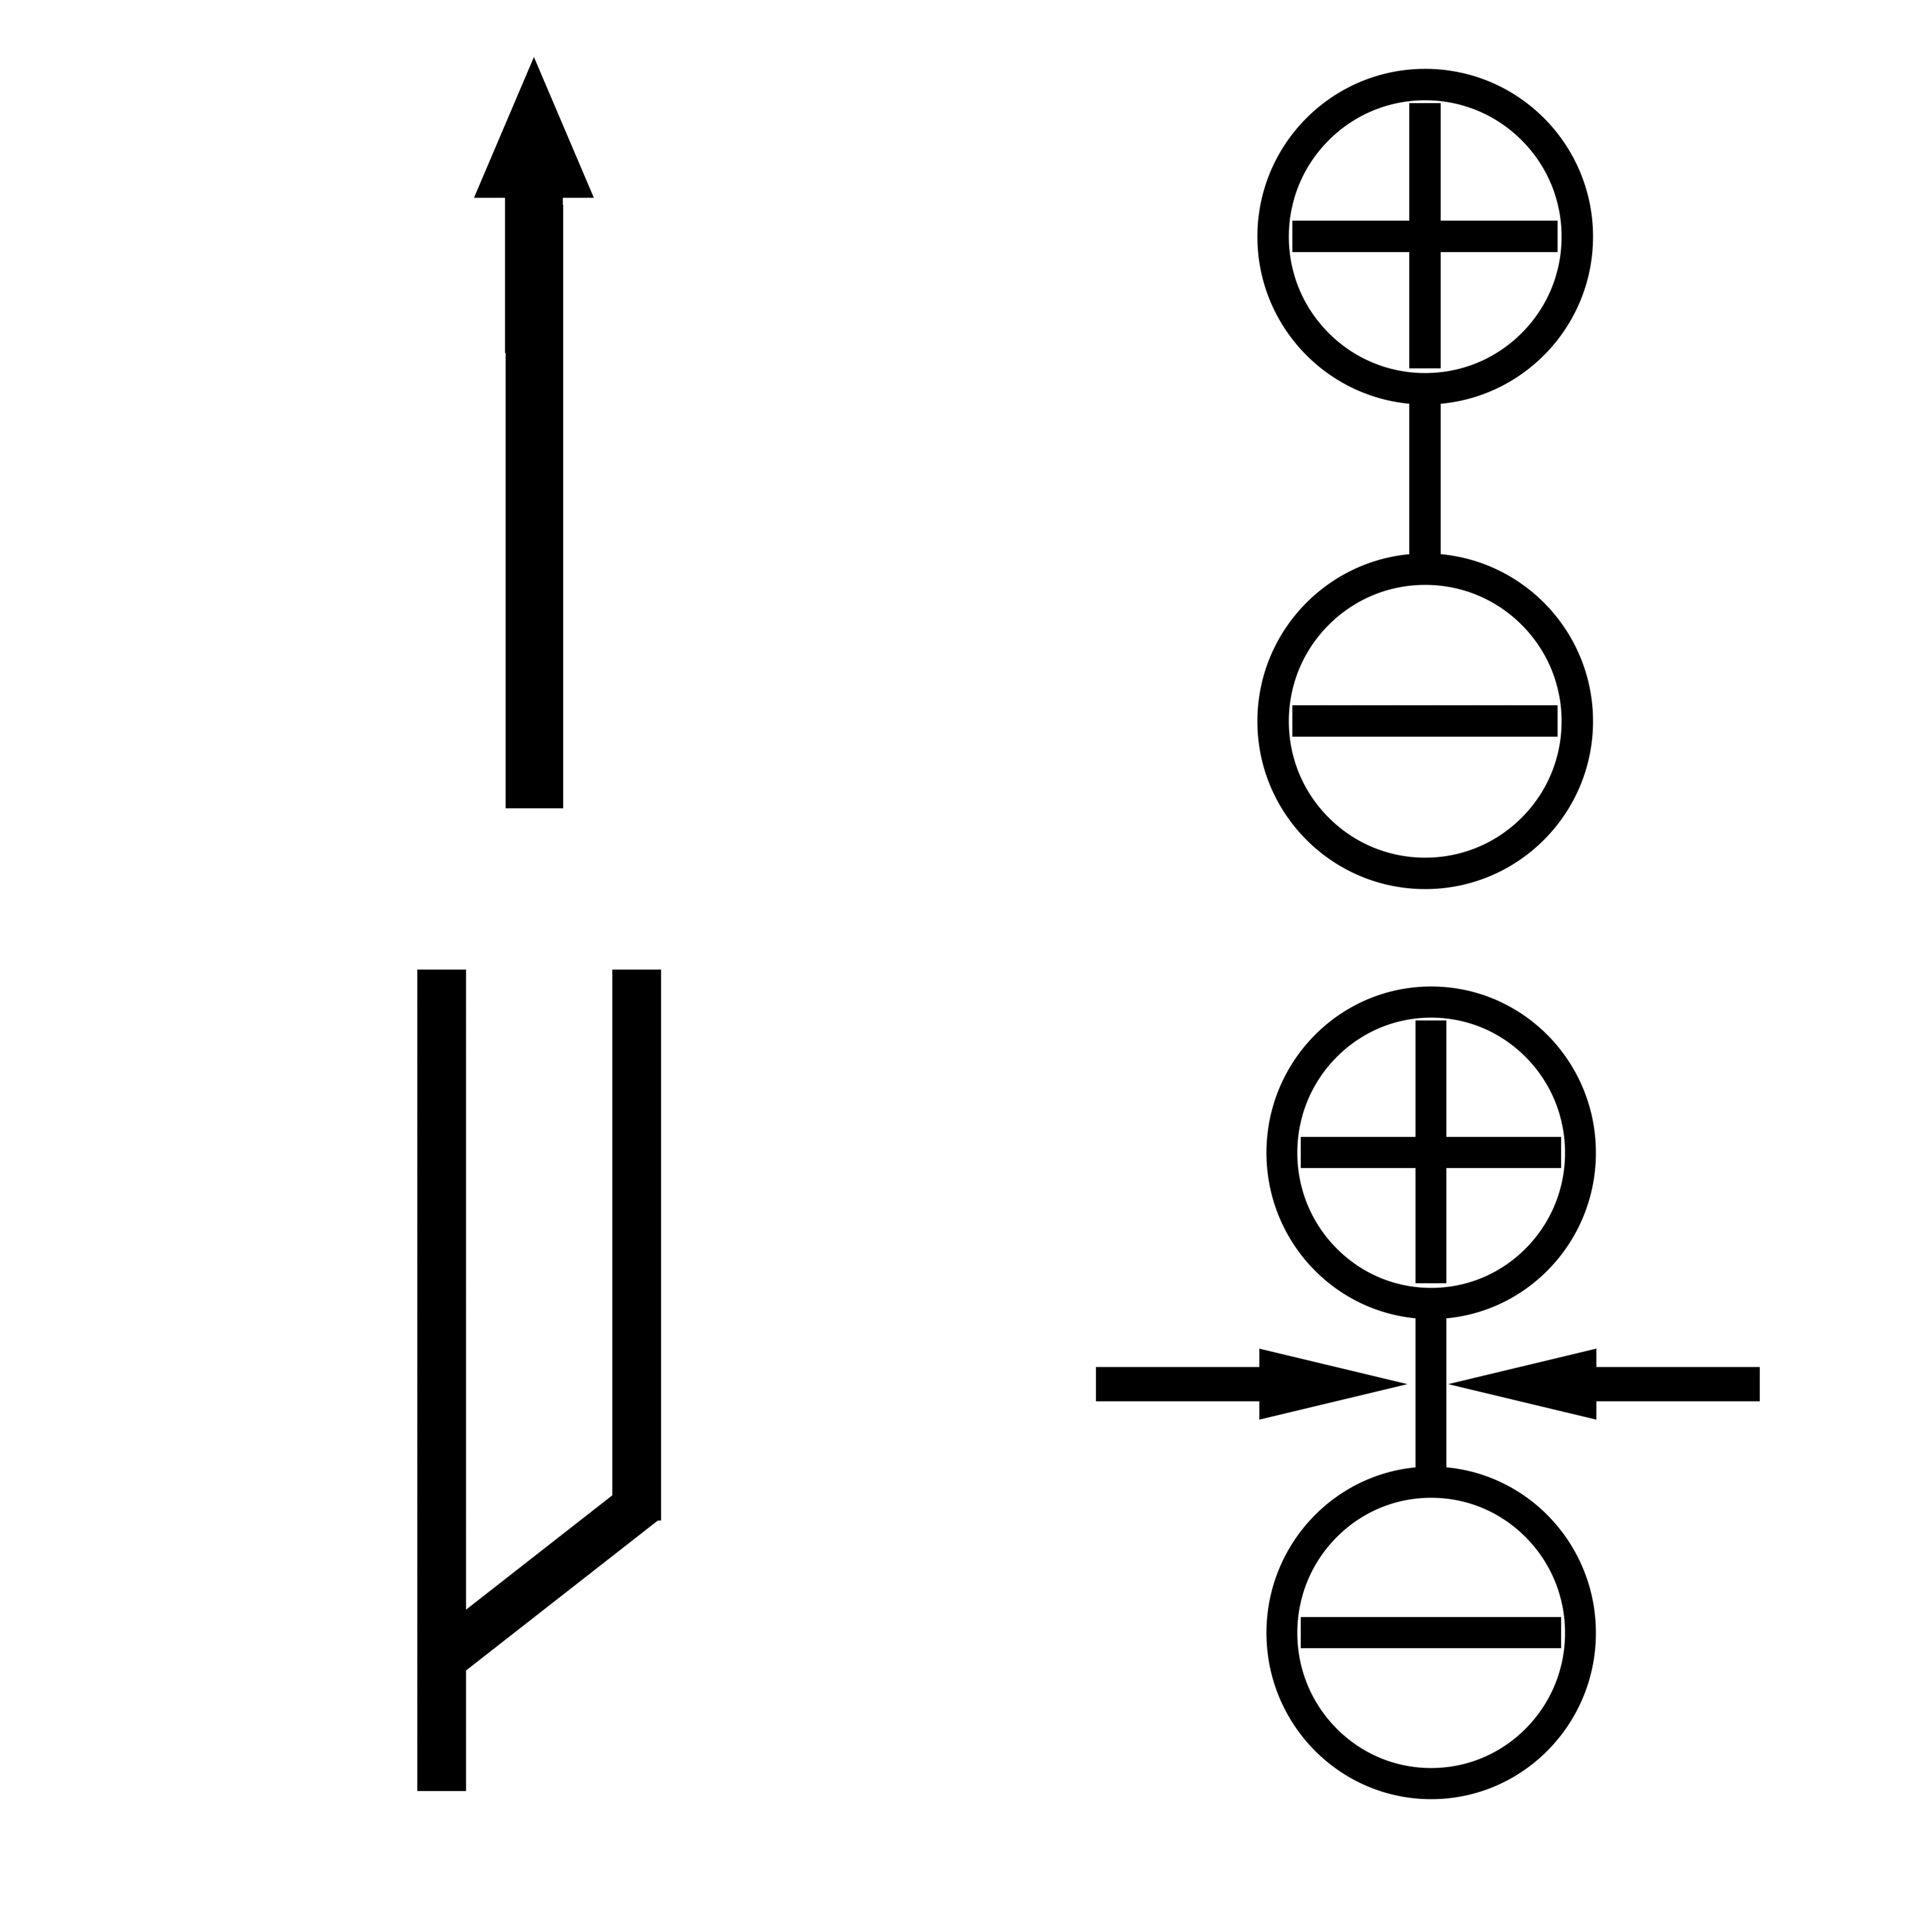 | 50–100 | congr. | [20] |
| Rb2(Ln(NO3)5 (H2O)2]  La – La, Ce | monocl. | m | Cc | 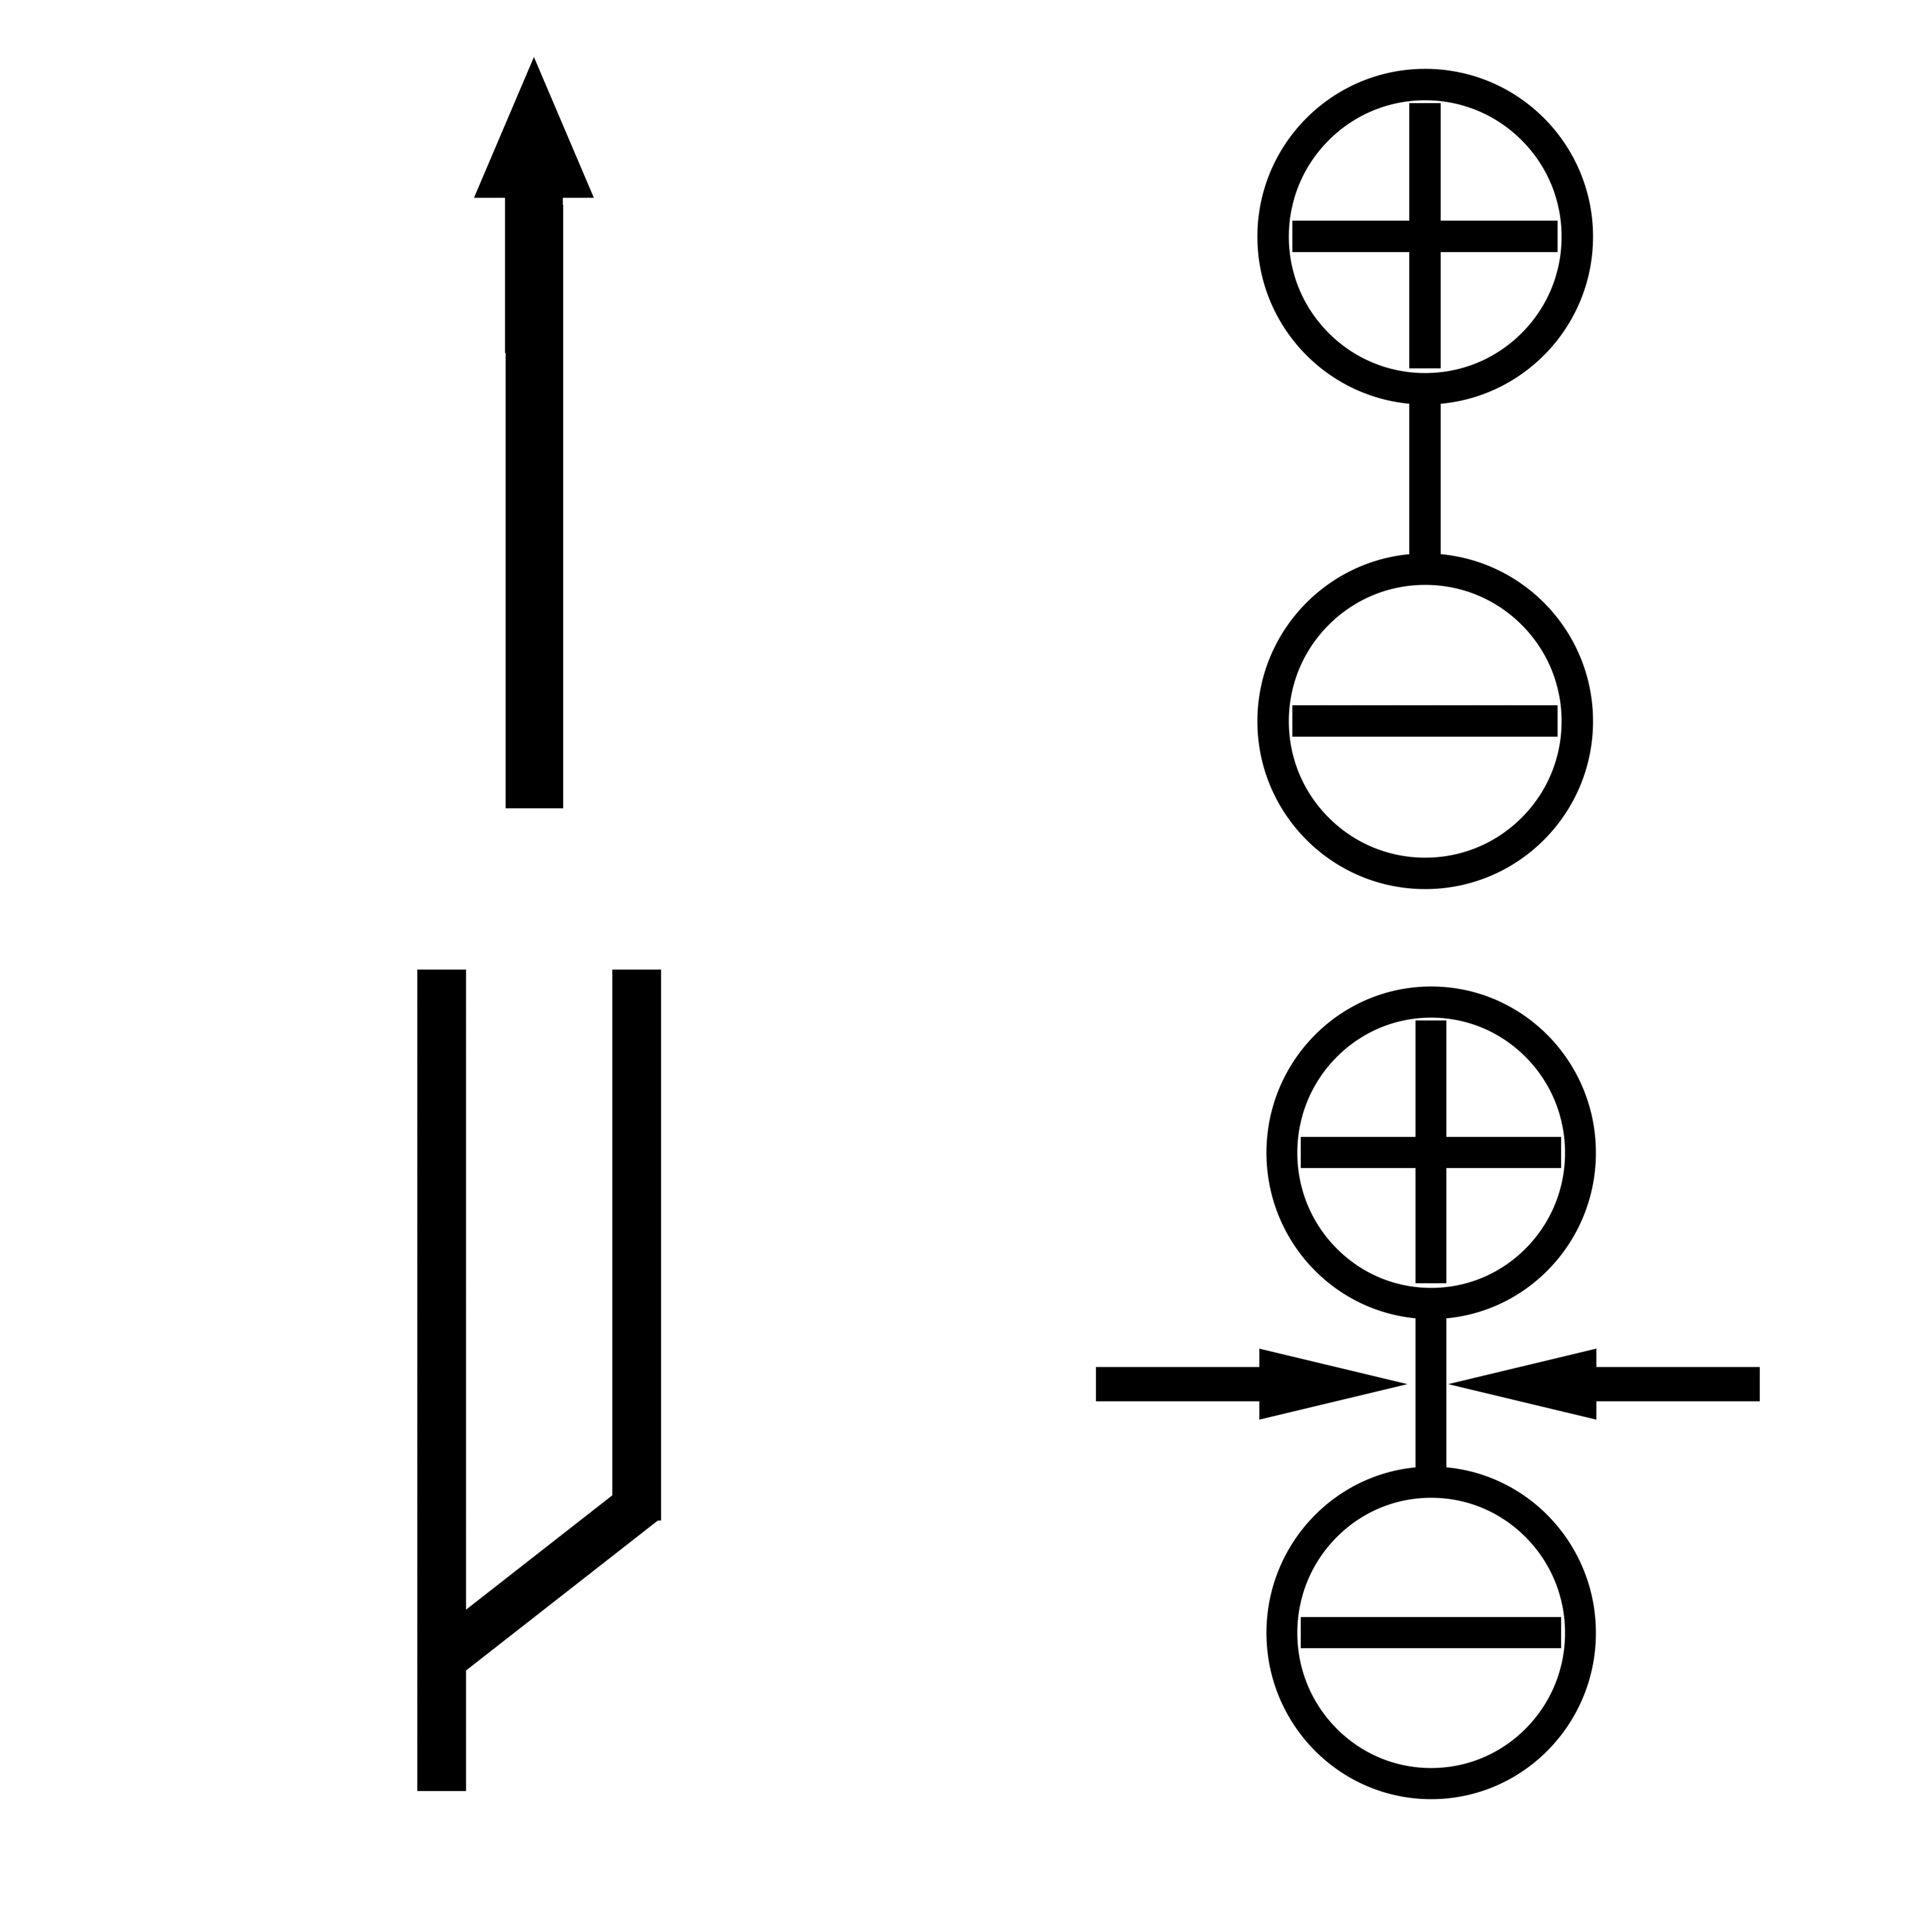 | 25–100 | incongr. | [21] |
| Rb5[Ln2(NO3)11]·H2O  Ln – Pr ÷ Sm | monocl. | 2/m | C2/c | 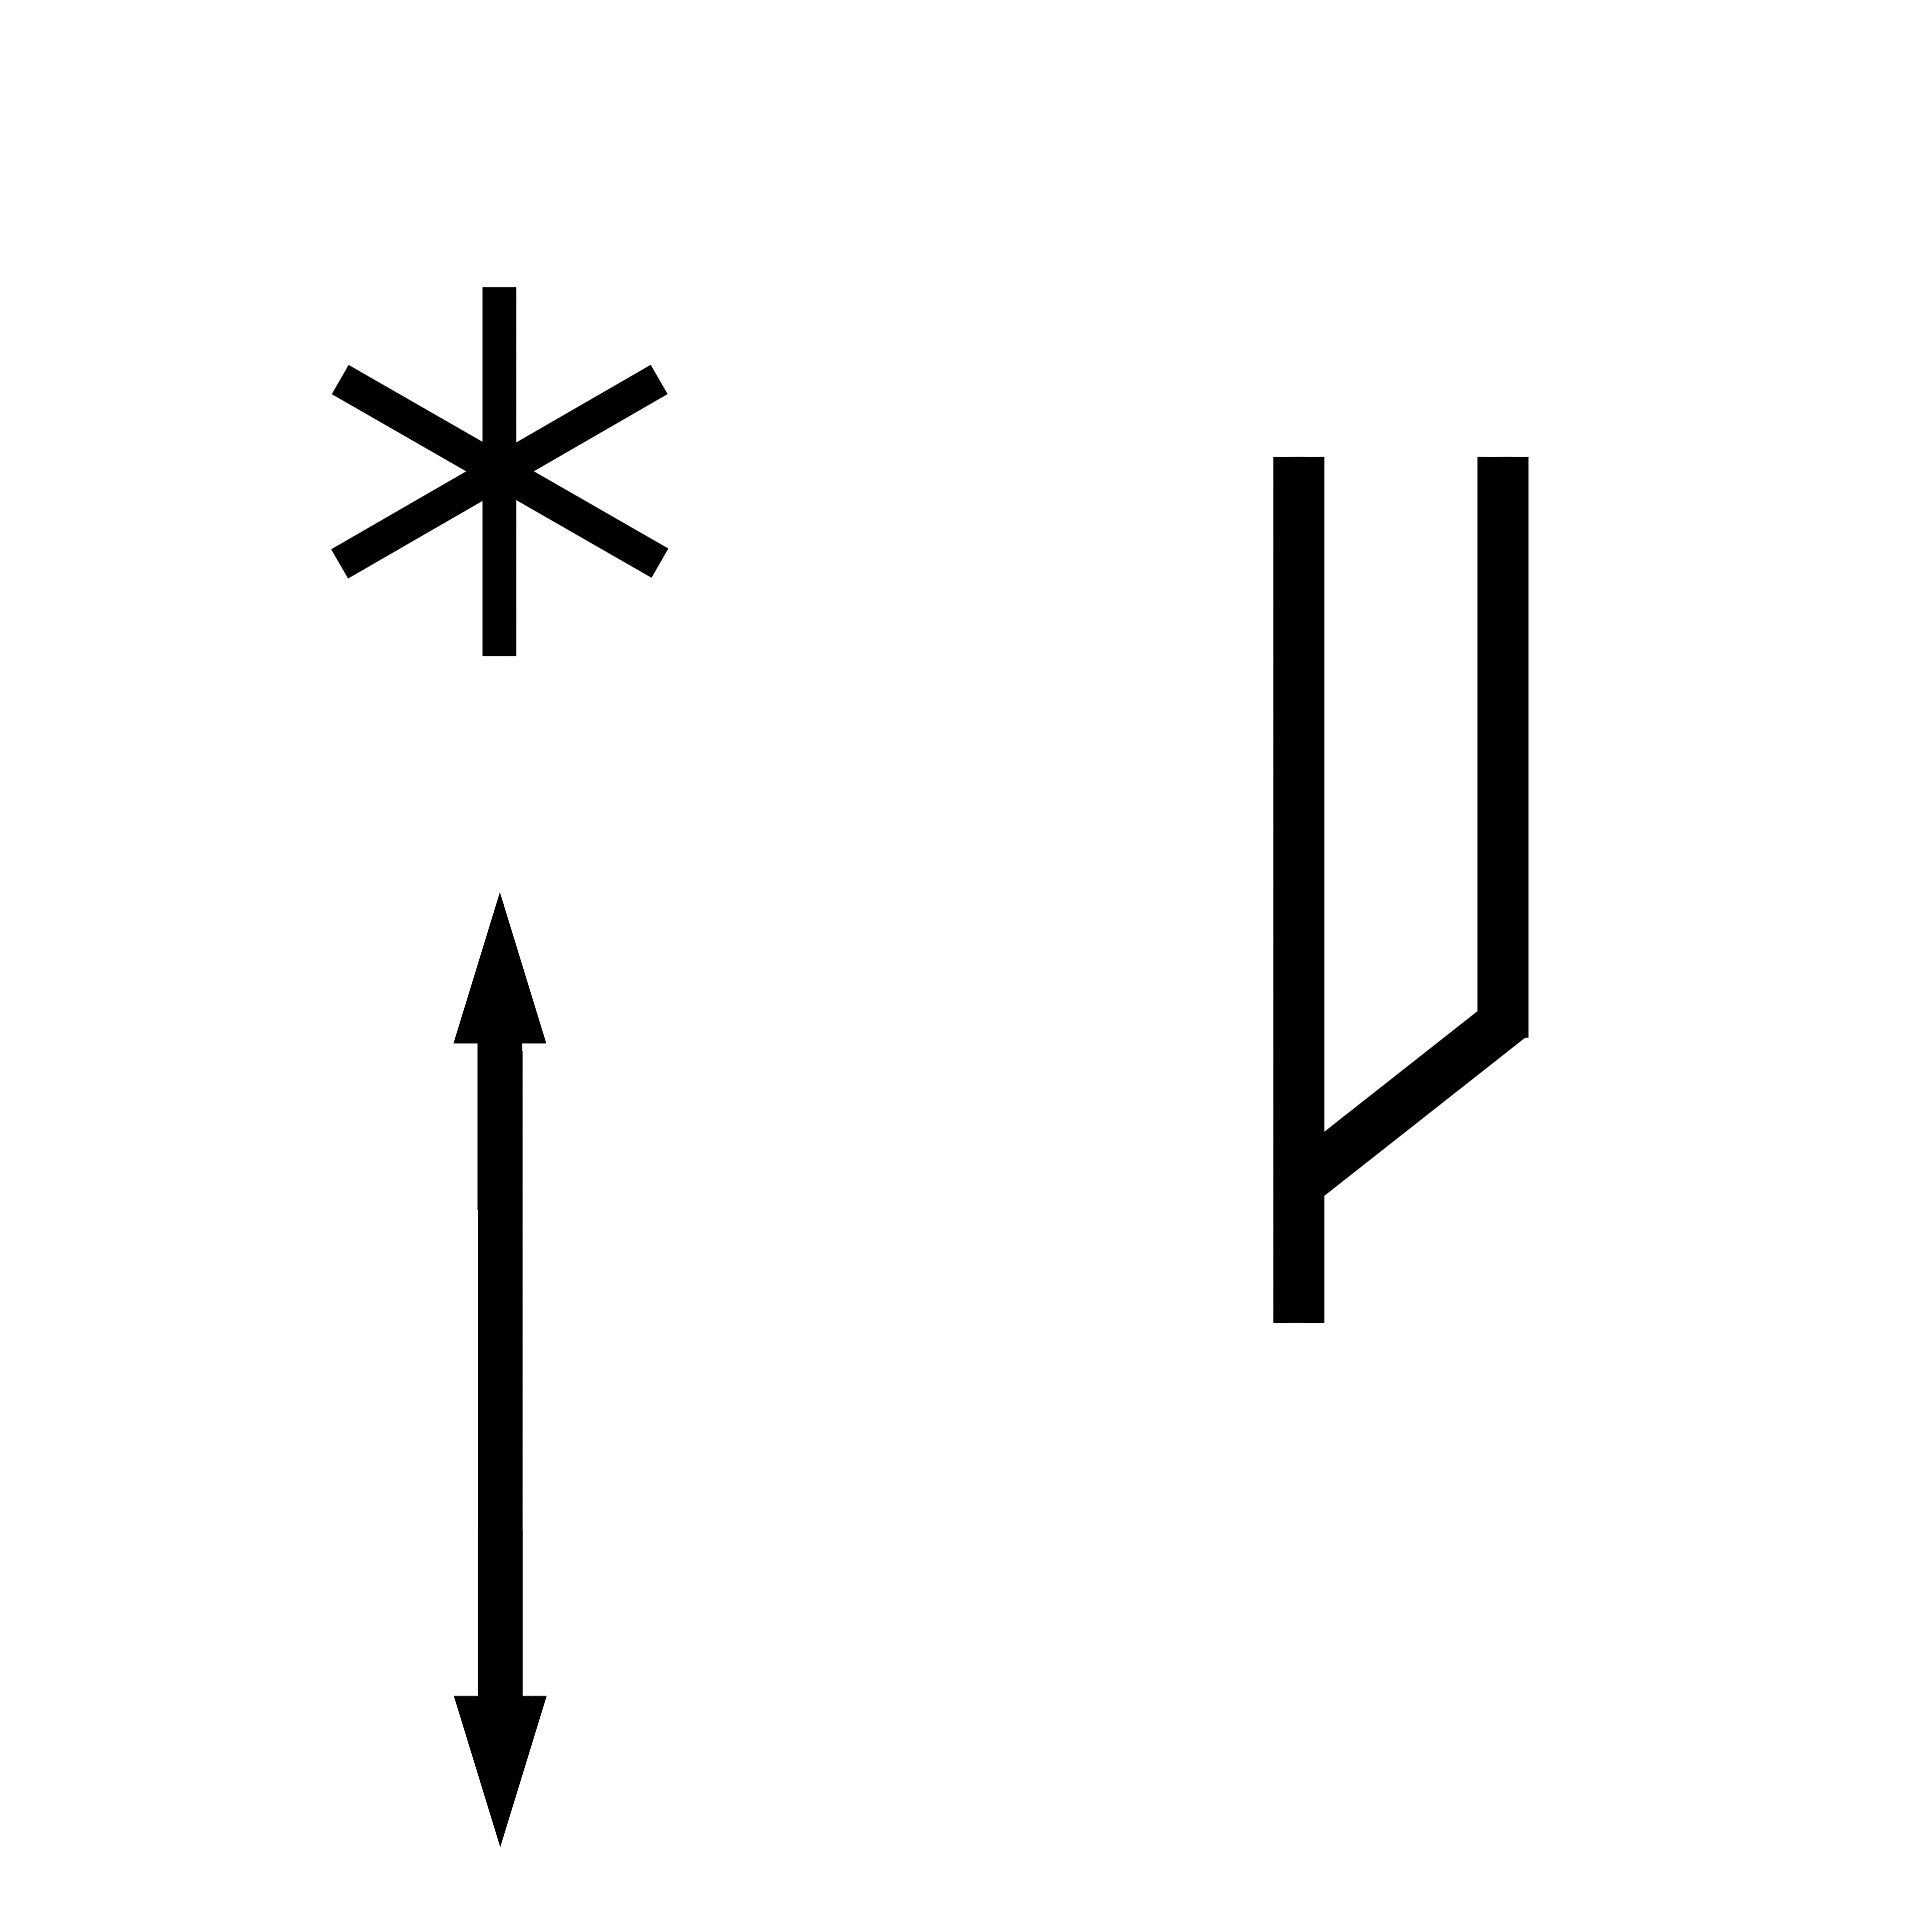 | 25–50 | incongr. | [22] |
| Rb[Ln(NO3)4(H2O)2]·H2O  Ln – Y, Gd–Lu | monocl. | 2/m | P21/n | 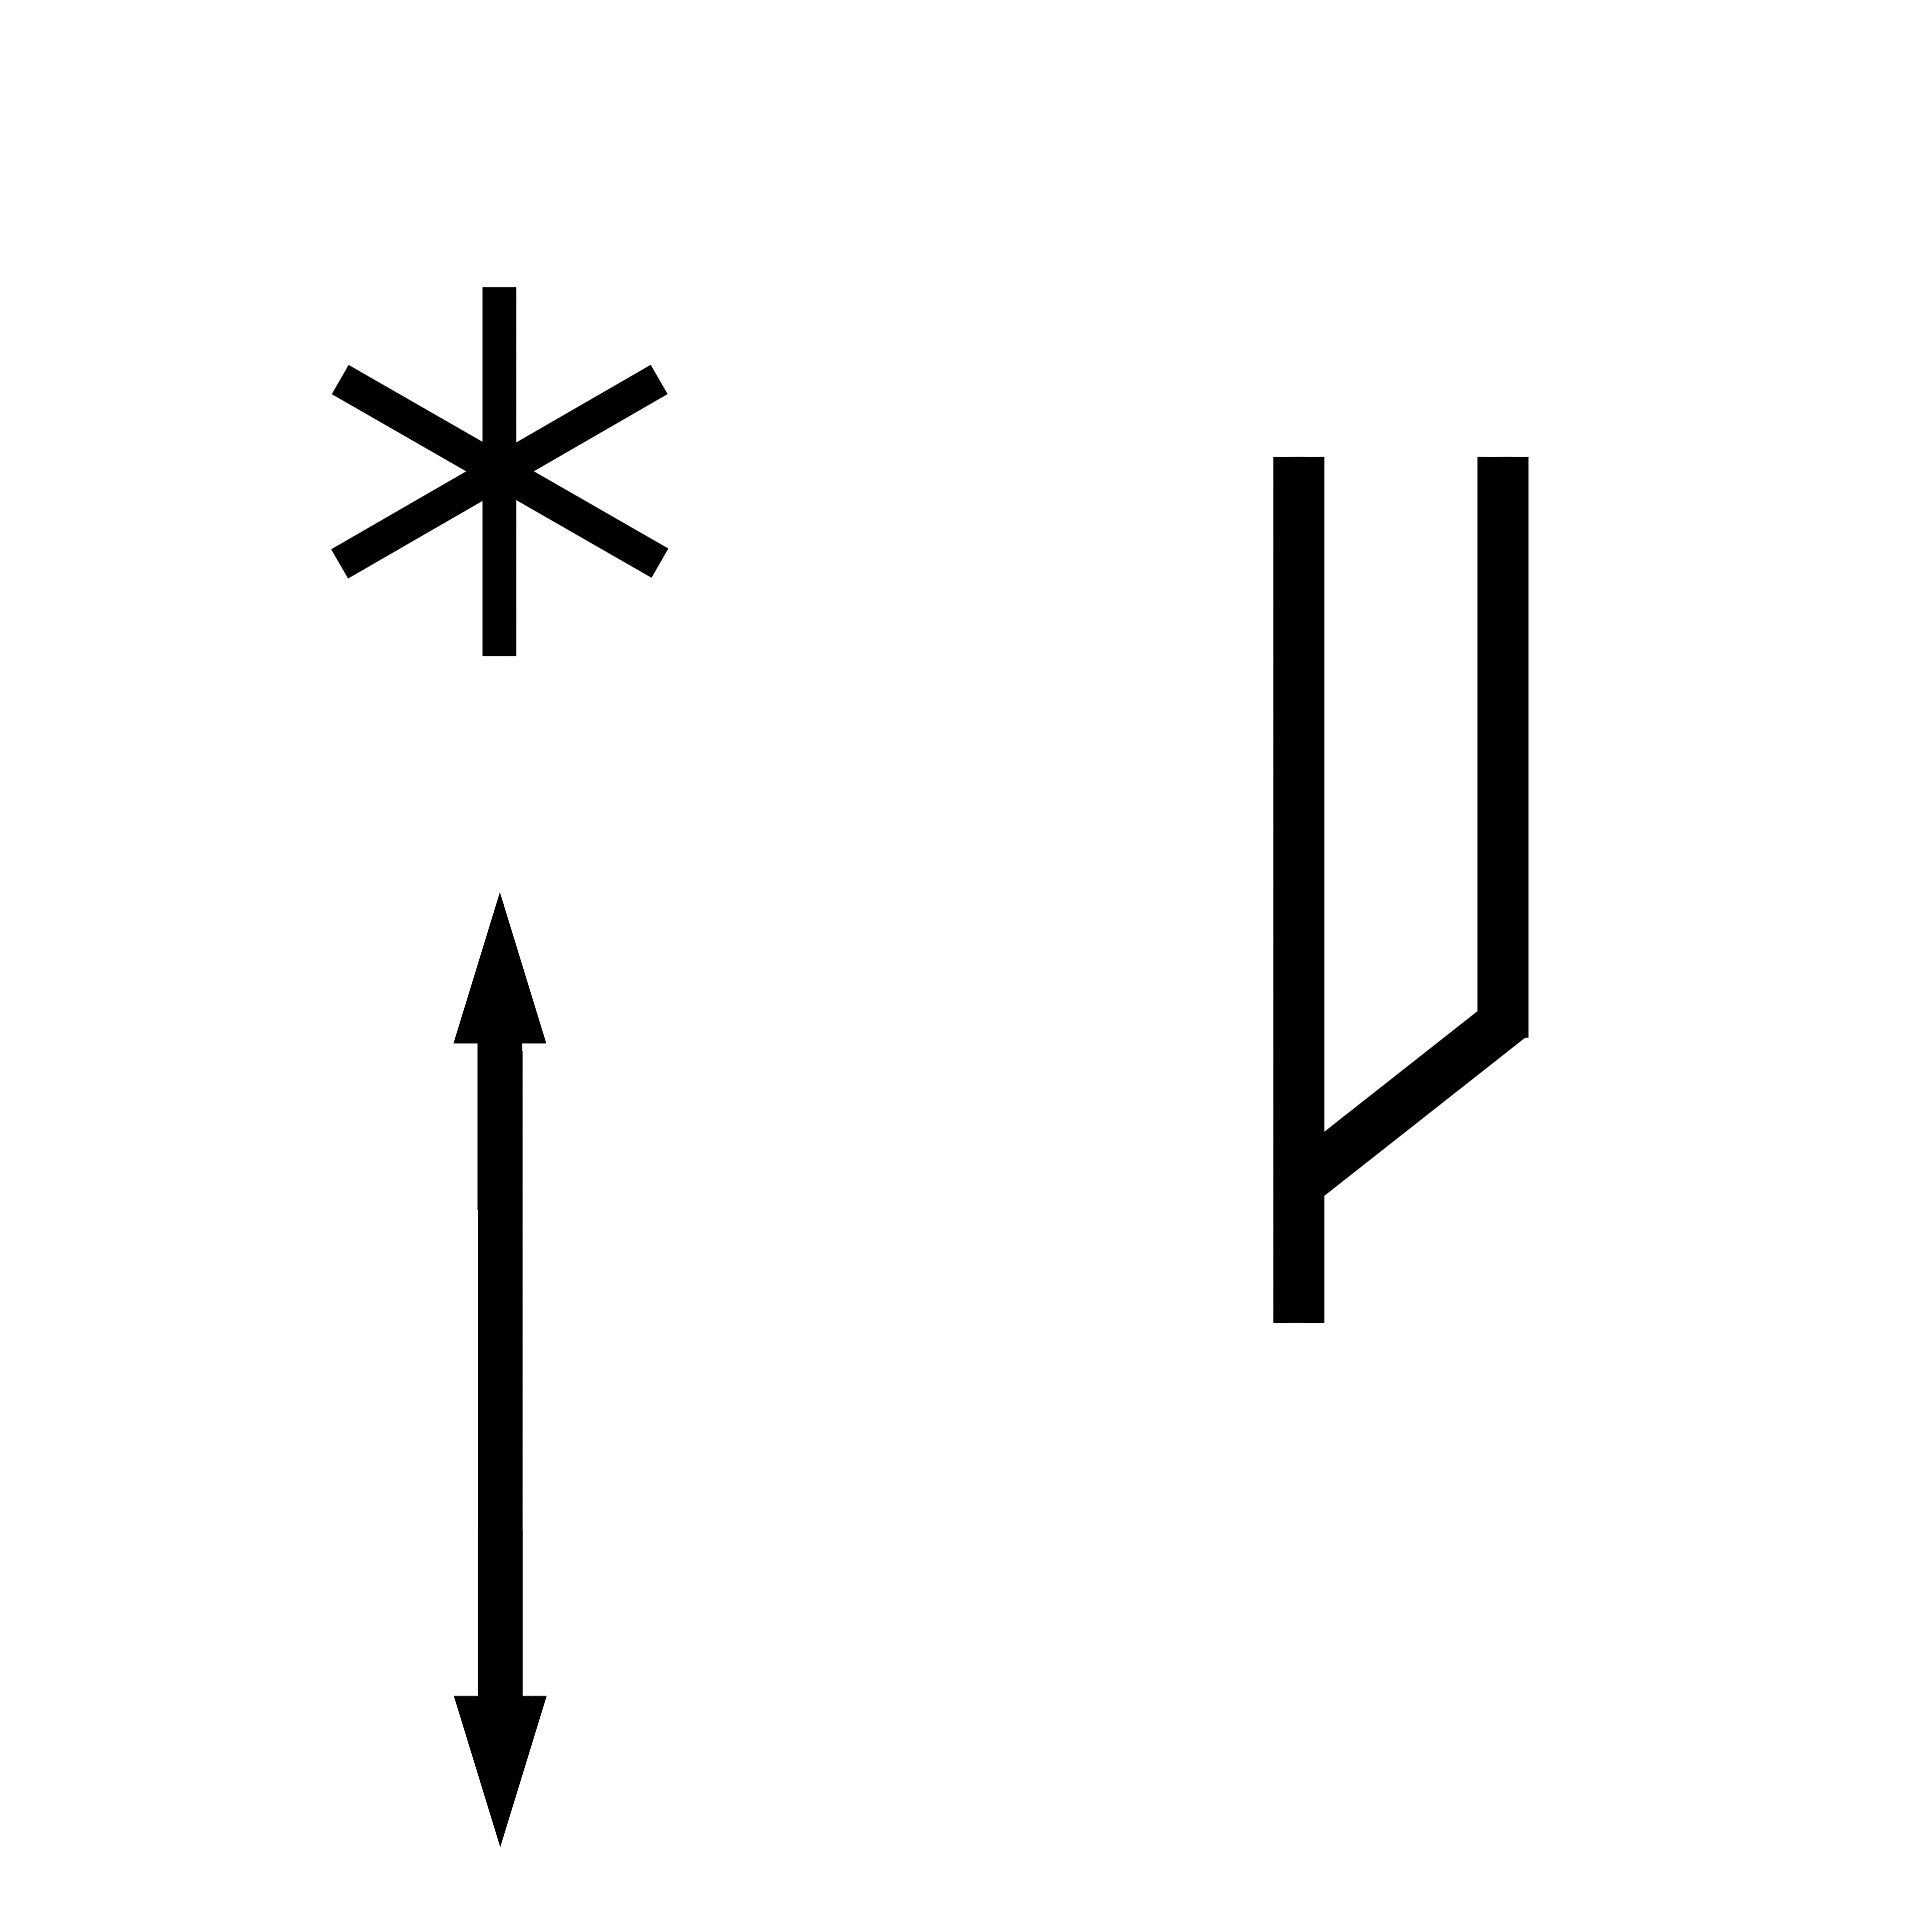 | 25–50 | congr. | [23] |
| Cs2[Ln(NO3)5(H2O)2]  Ln – Ce–Nd | monocl. | 2/m | C2/c | 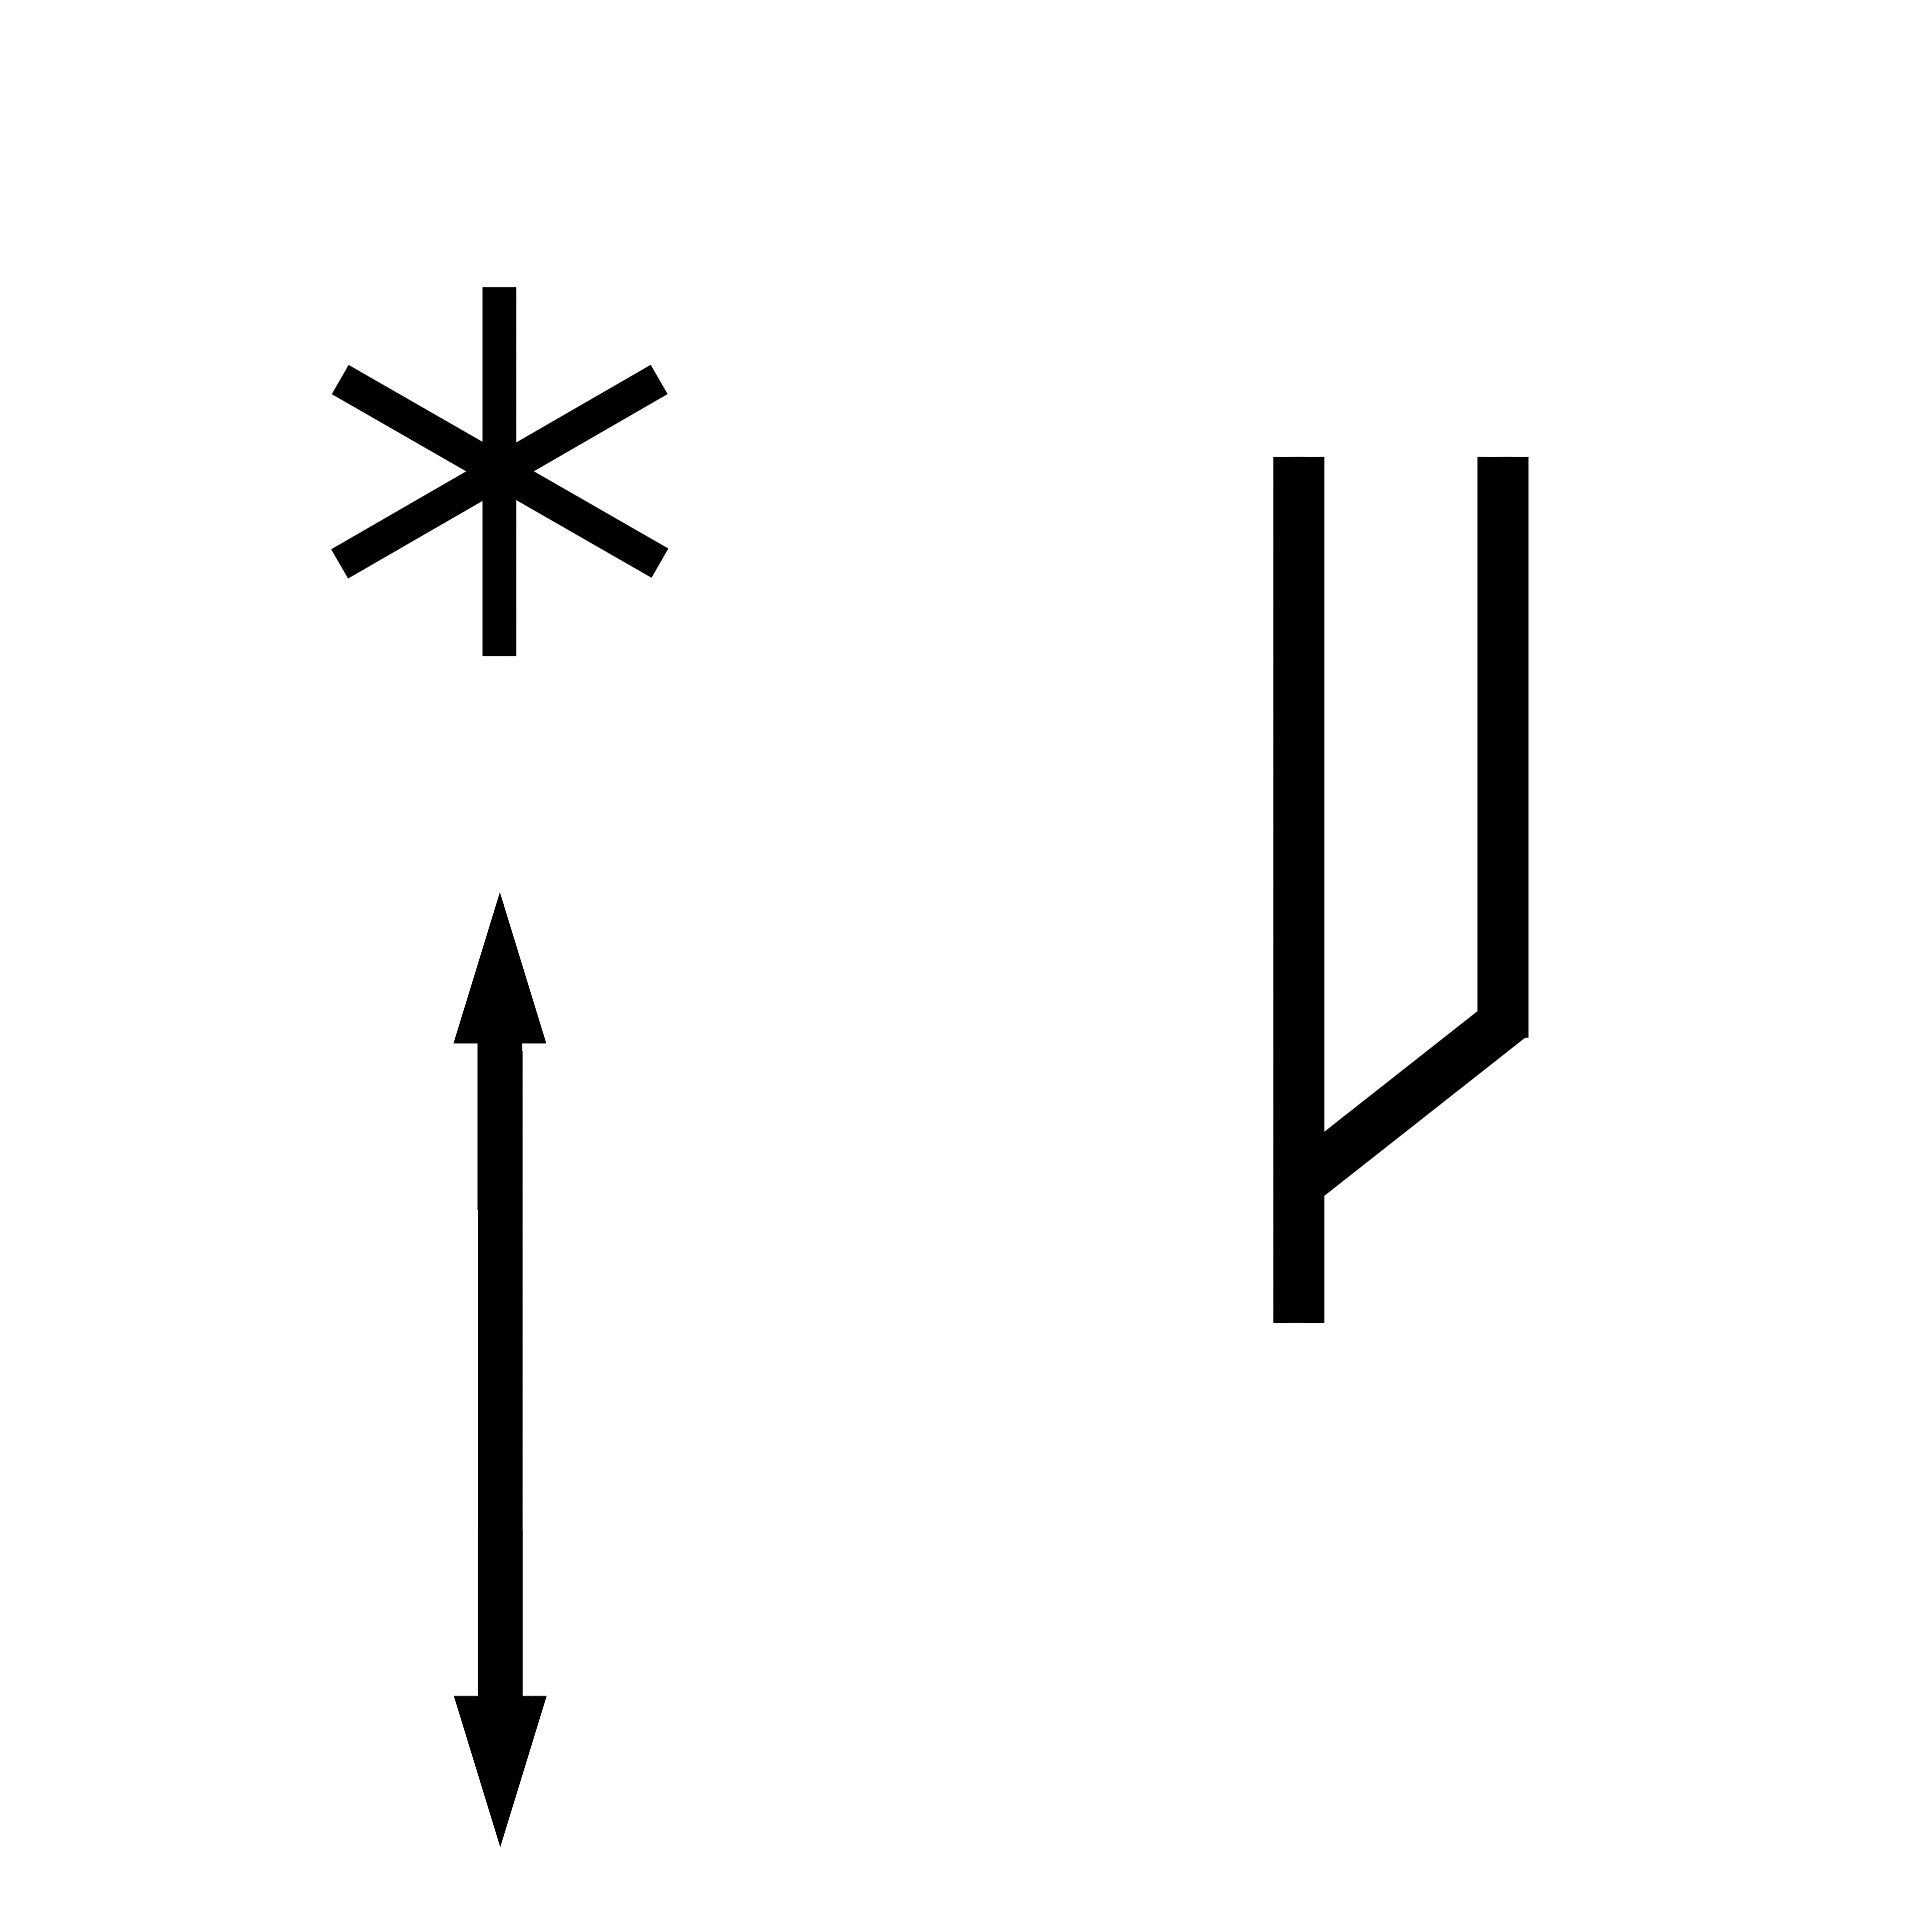 | 25–100 | incongr. | [24–26] |
| Cs[Ln(NO3)4(H2O)3]  Ln – Pr–Sm | tricl. |  |  | 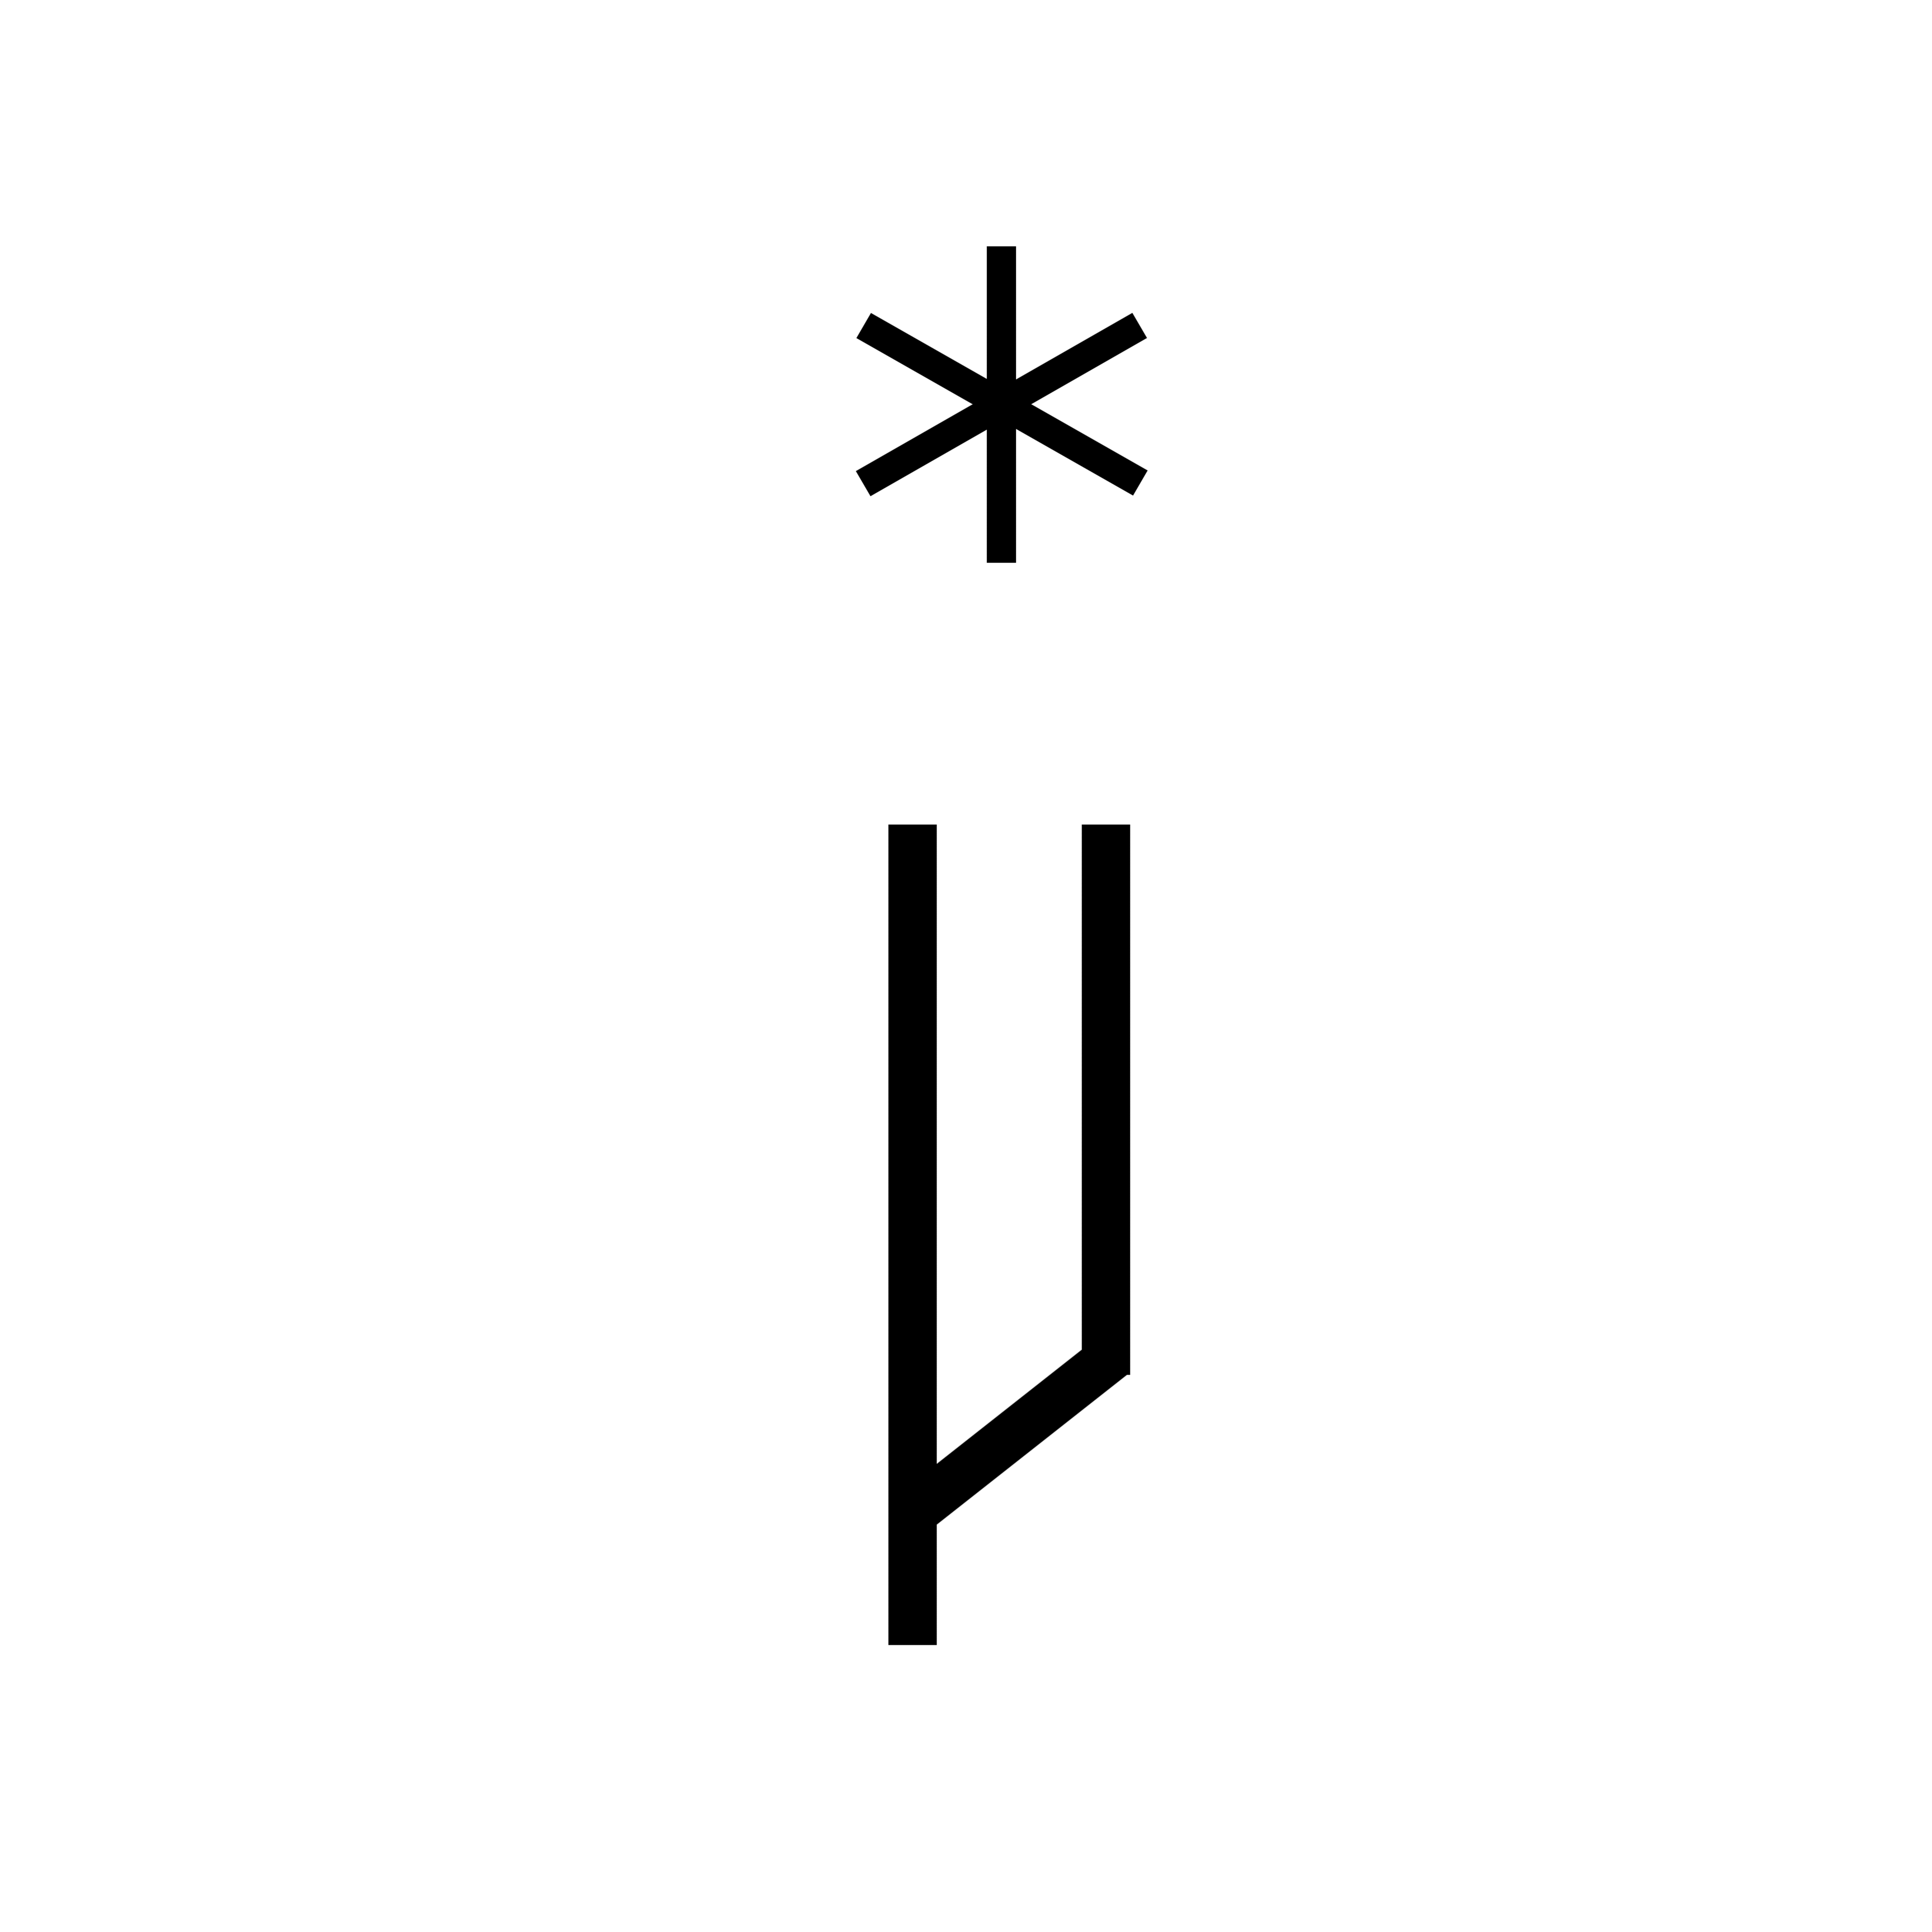 | 50–65 | incongr. | [27] |
| Cs[Ln(NO3)4(H2O)2]·H2O  Ln – Y, Gd–Lu | monocl. | 2/m | P21/n | 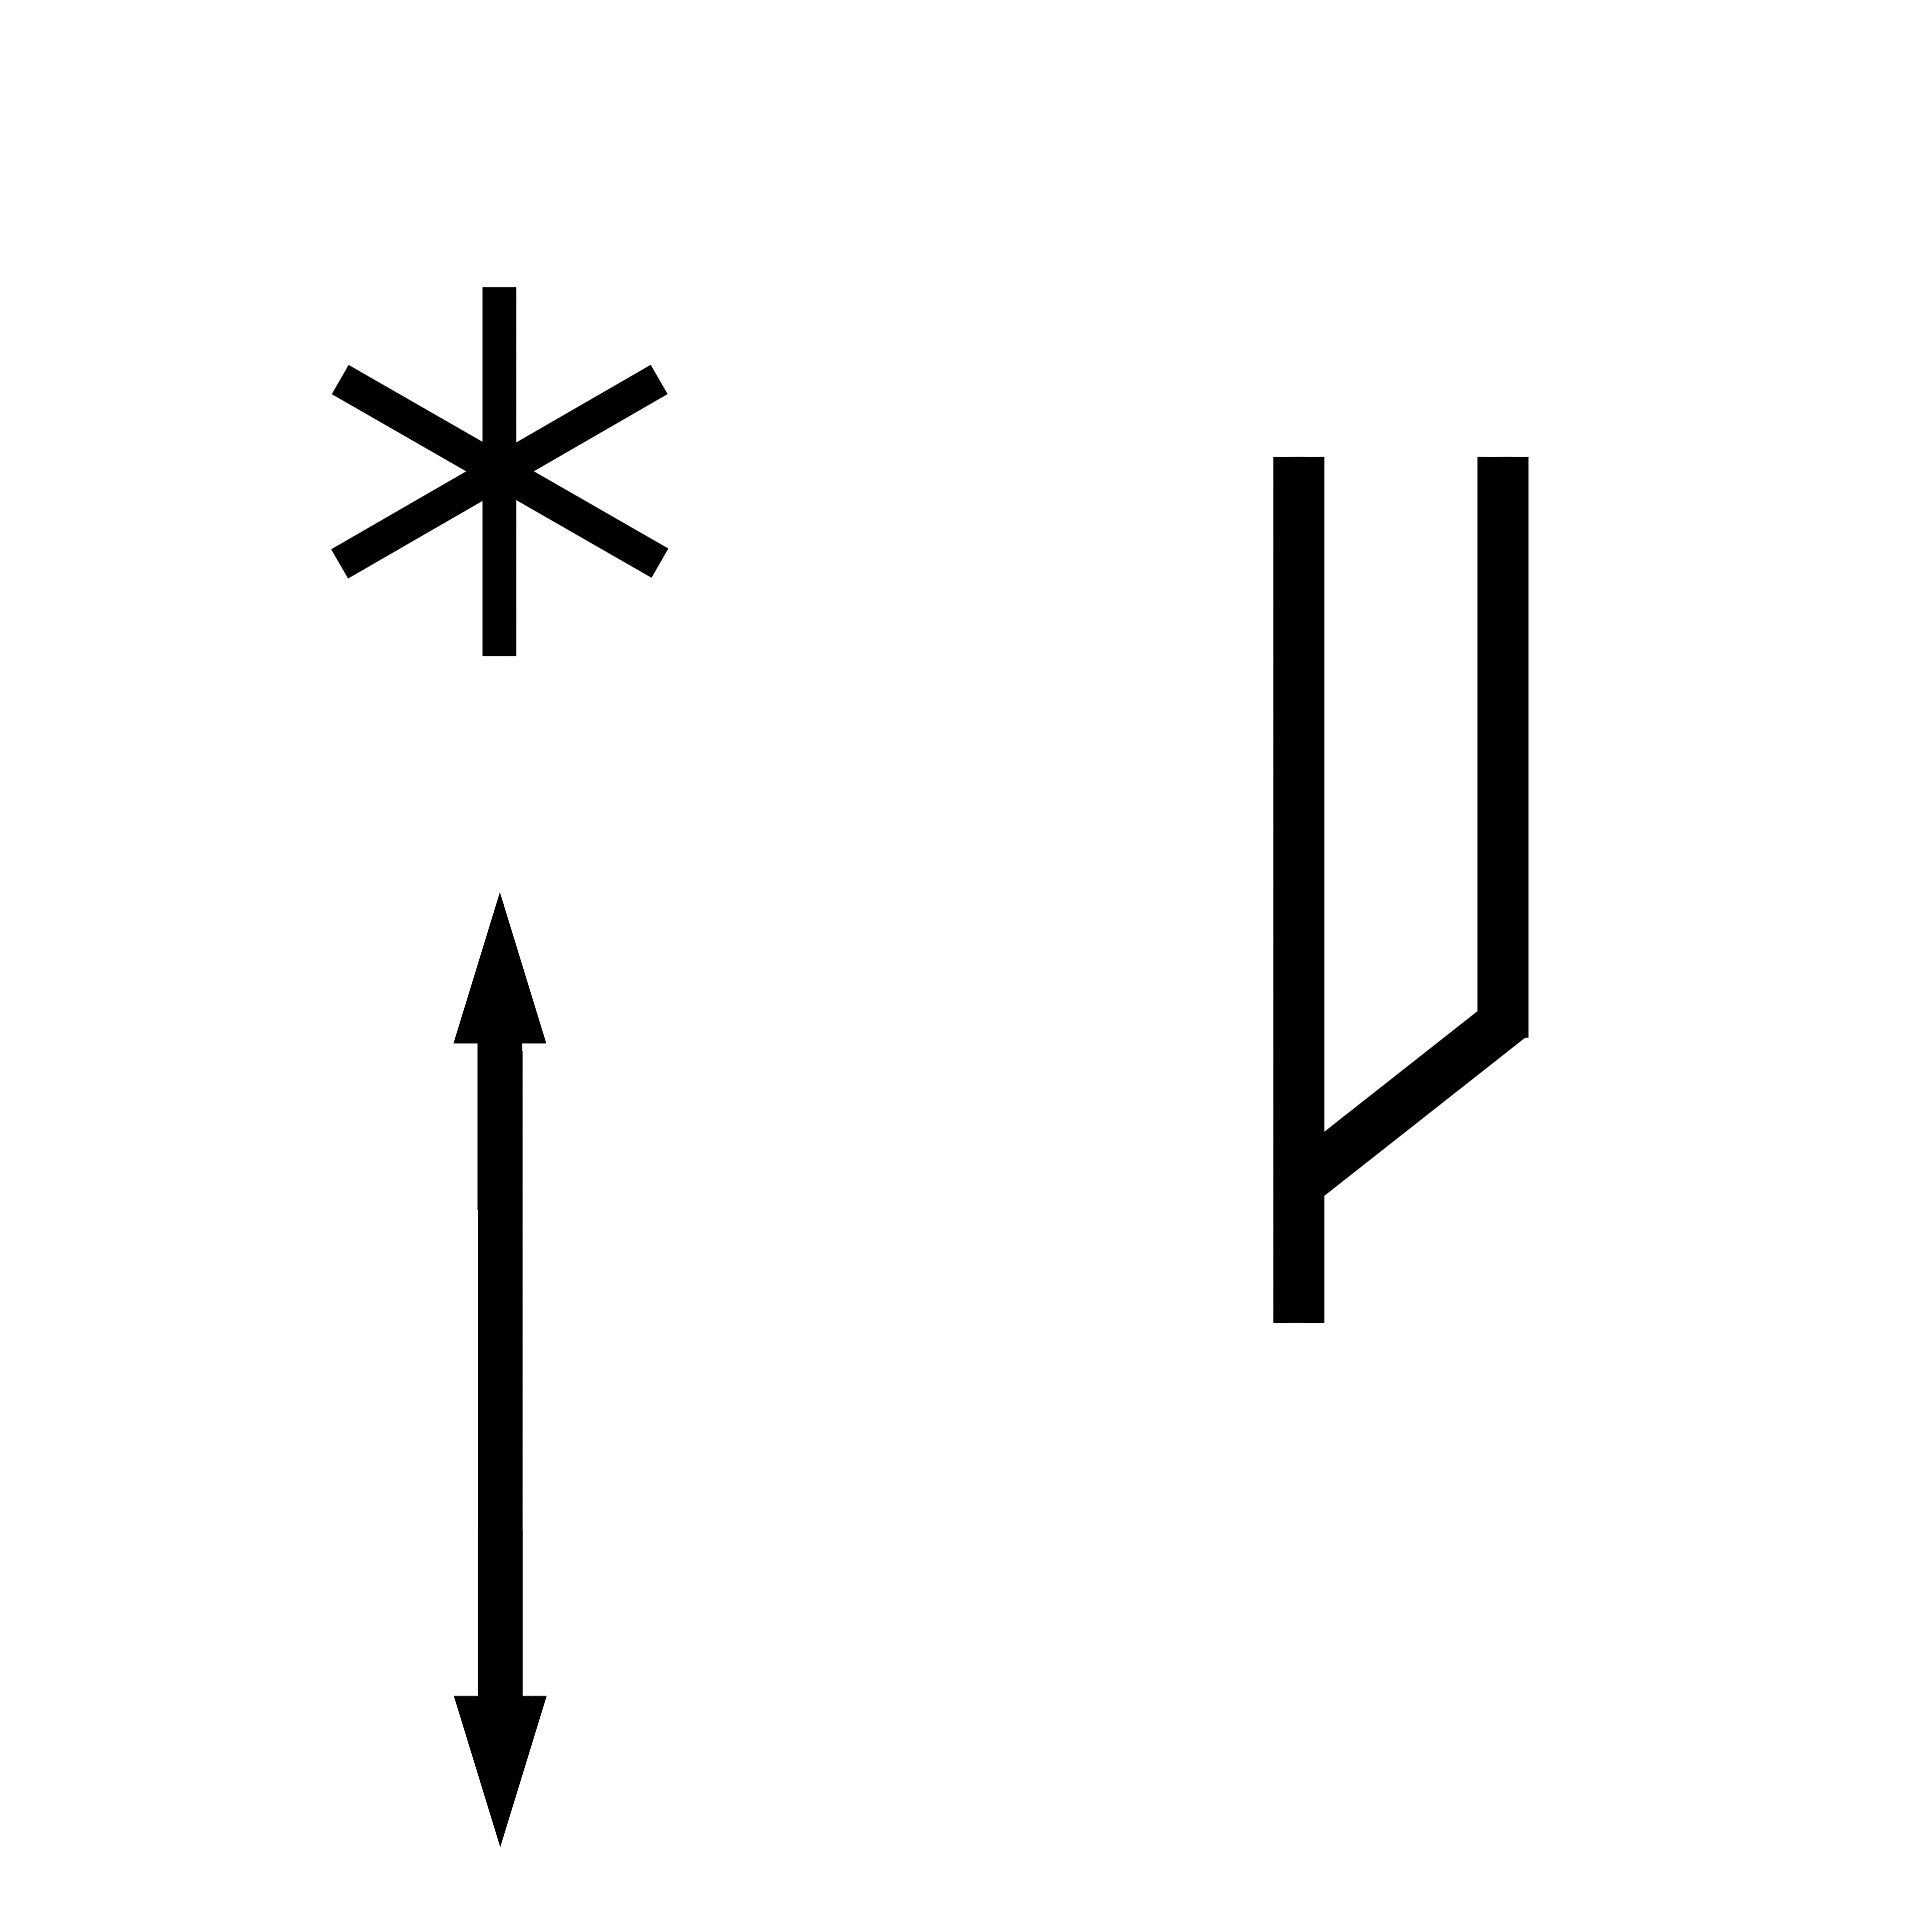 | 25–50 | congr. | [28] |

Table 5. Thermal transformations of representatives of isostructural

groups of coordination nitrates REE, Y

| Connections | Representatives | Dehydration | Melting  in crystallization water | Polymorphic transitions | Melting anhydrous form |
| --- | --- | --- | --- | --- | --- |
| Li3[Ln2(NO3)9]3H2O | La – Nd* | 65,  183,  216 | – | – | 274 |
| Na2[Ln(NO3)5]H2O | La – Nd* | 148 | – | 271 | 328 |
| K2[Ln(NO3)5(H2O)2] | La – Nd* | 95,  111 | 95 | 219 | 314 |
| K3[Ln2(NO3)9]H2O | La – Sm* | 126 | – | – | 347 |
| K[Ln(NO3)4(H2O)2] | Y, Gd – Lu** | 138,  172 | 138 | – | – |
| Rb[Ln(NO3)4(H2O)2]H2O | Y, Gd – Lu*** | 77, 190, 256 | 77 | – | – |
| Cs[Ln(NO3)4(H2O)2]H2O | Y, Gd – Lu*** | 93,170, 240 | 93 | – | – |

Note : * data for representatives of the cerium subgroup – (coordination compounds Nd ) ;

**, *** data for the representatives of the Yttrium subgroup – (respectively, coordination compounds Gd, Yb).


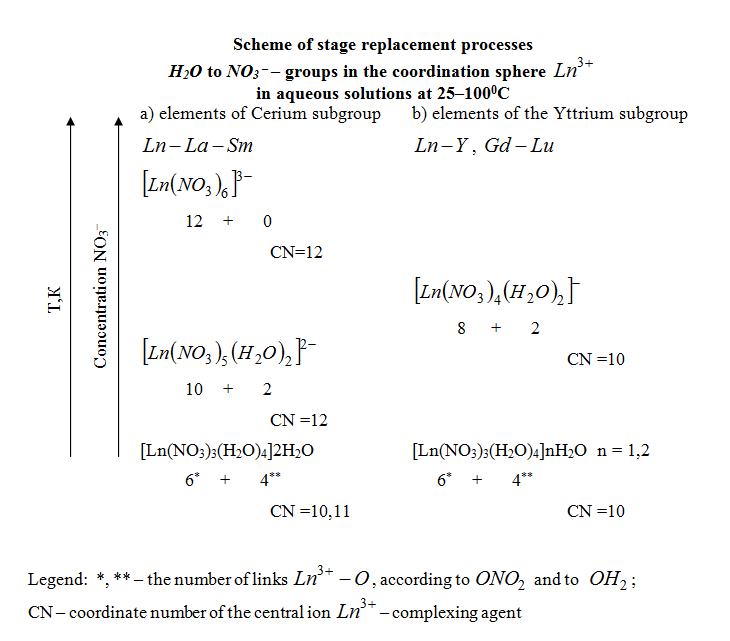


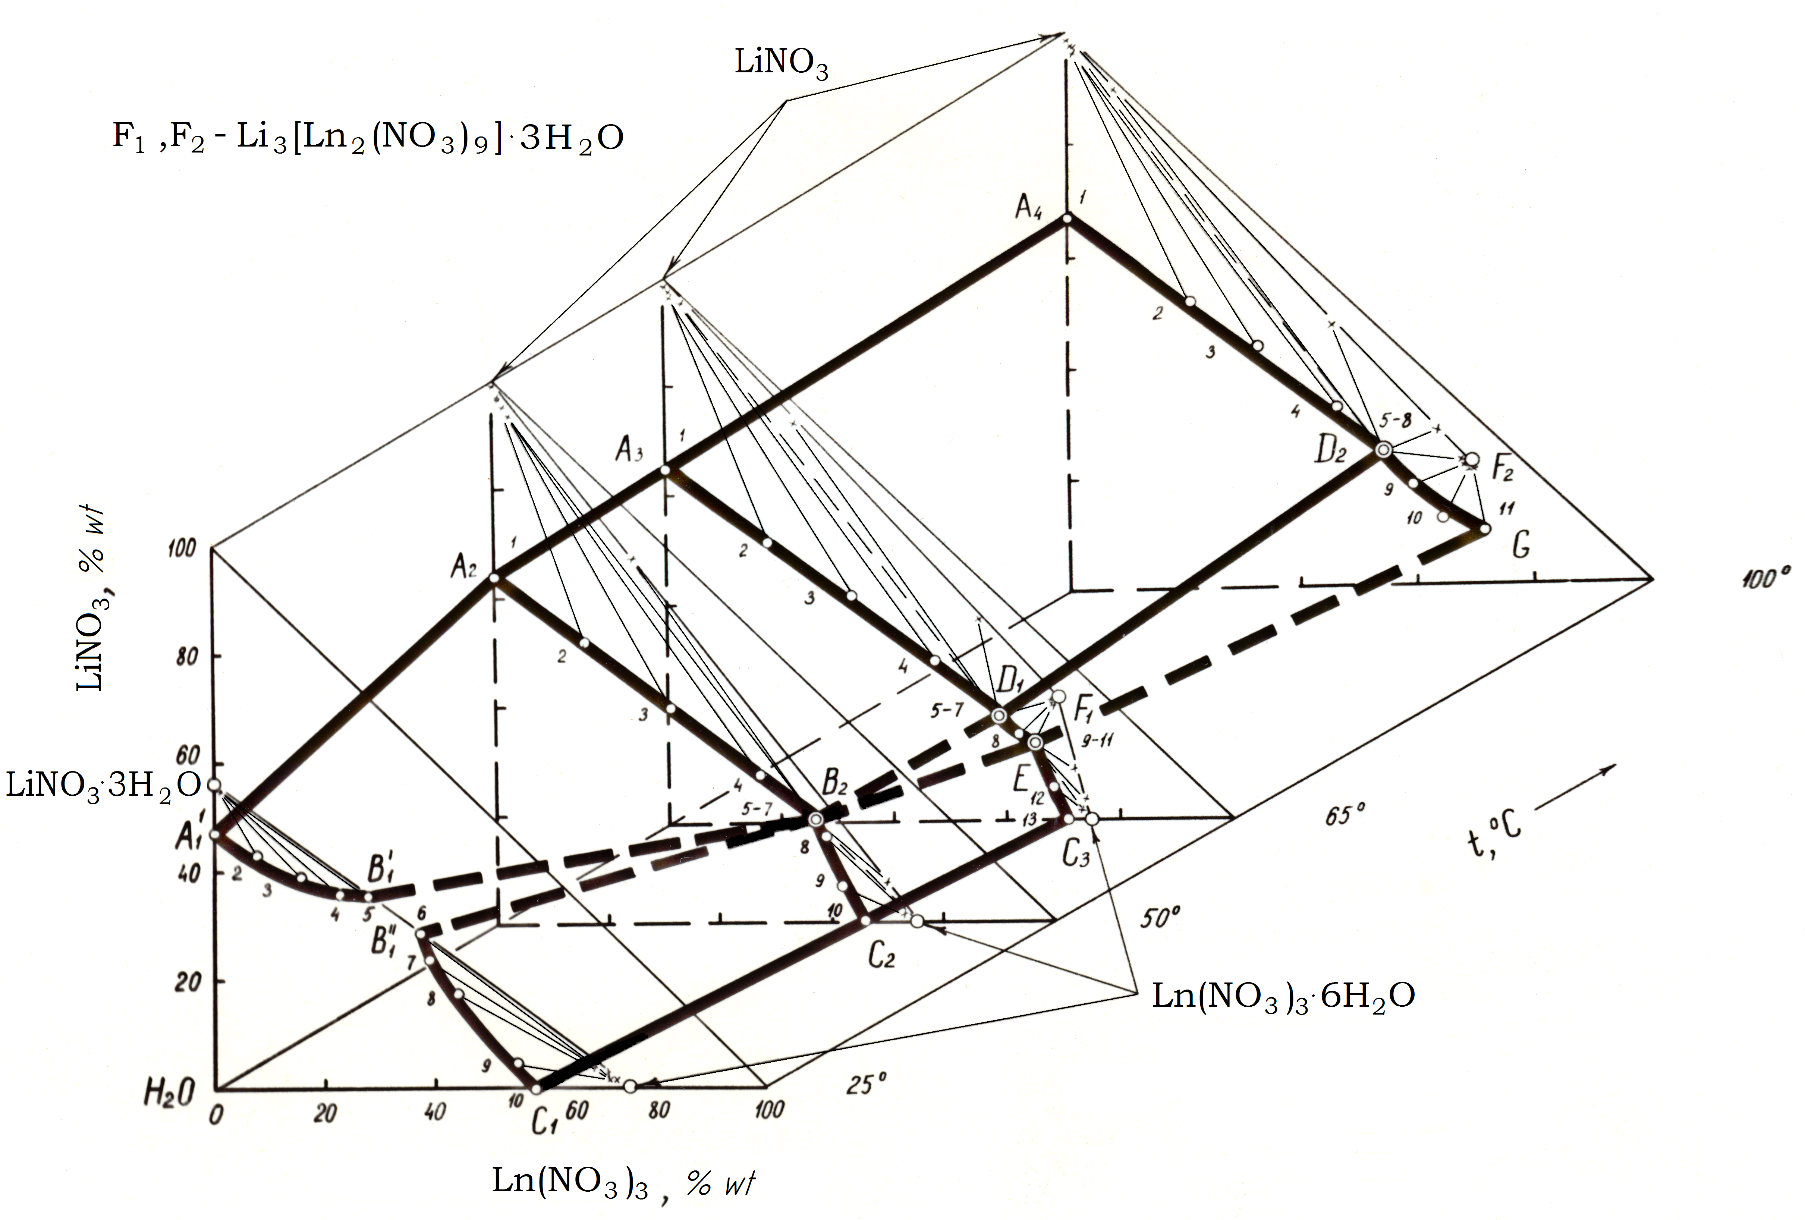


Fig. 1. Polytherm solubility of the system LiNO3 – Ln(NO3)3 – H2O (Ln – La–Nd)


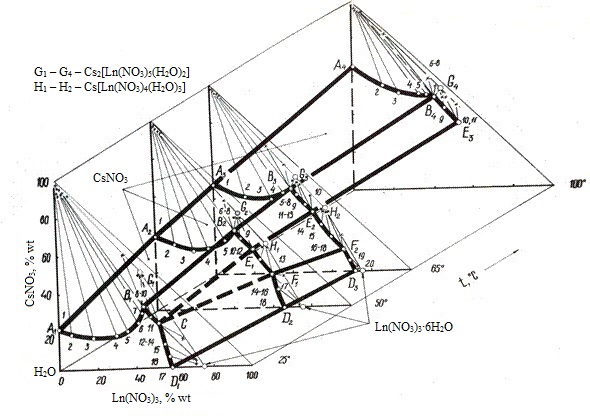


Fig. 2. Polytherm solubility of the system CsNO3 – Ln(NO3)3 – H2O ( Ln – La–Sm)


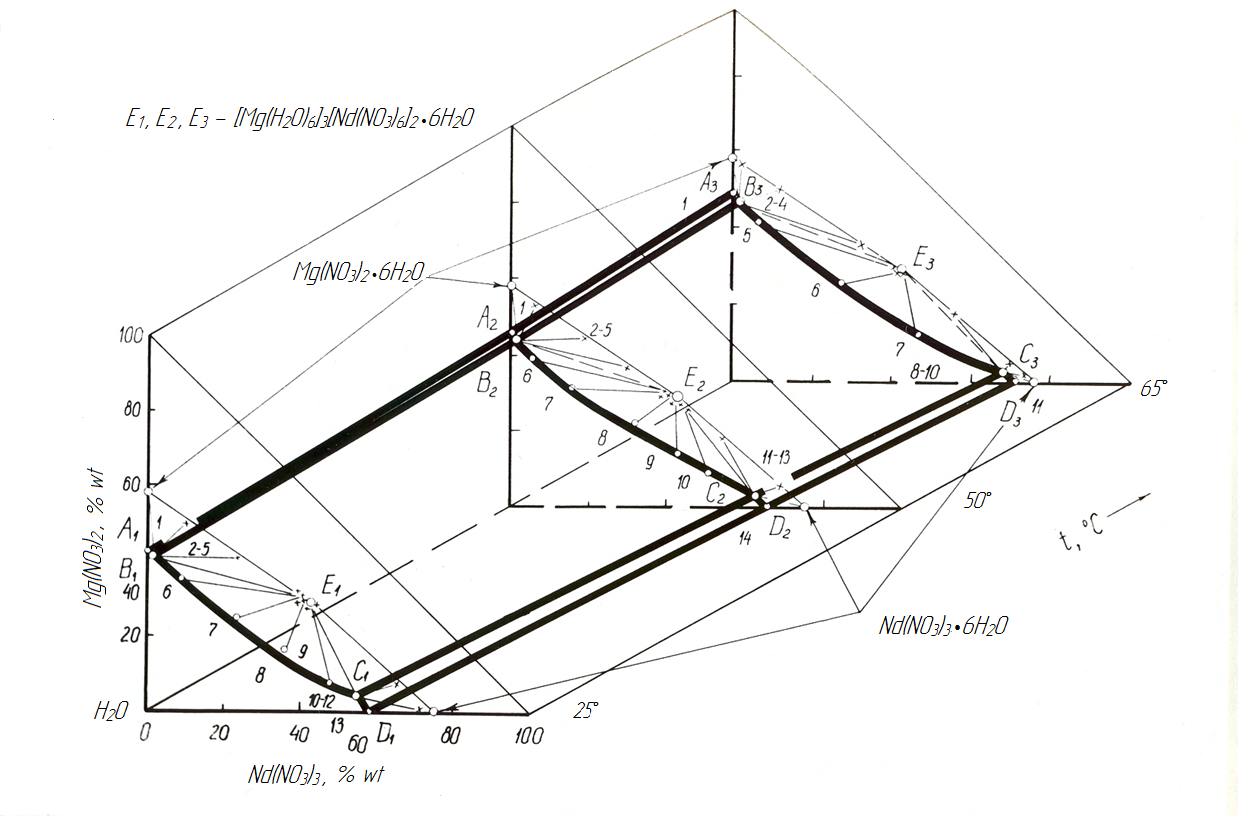


Fig. 3. Polytherm solubility of the system Mg(NO3)2 – Nd(NO3)3 – H2O at 25–65 оС


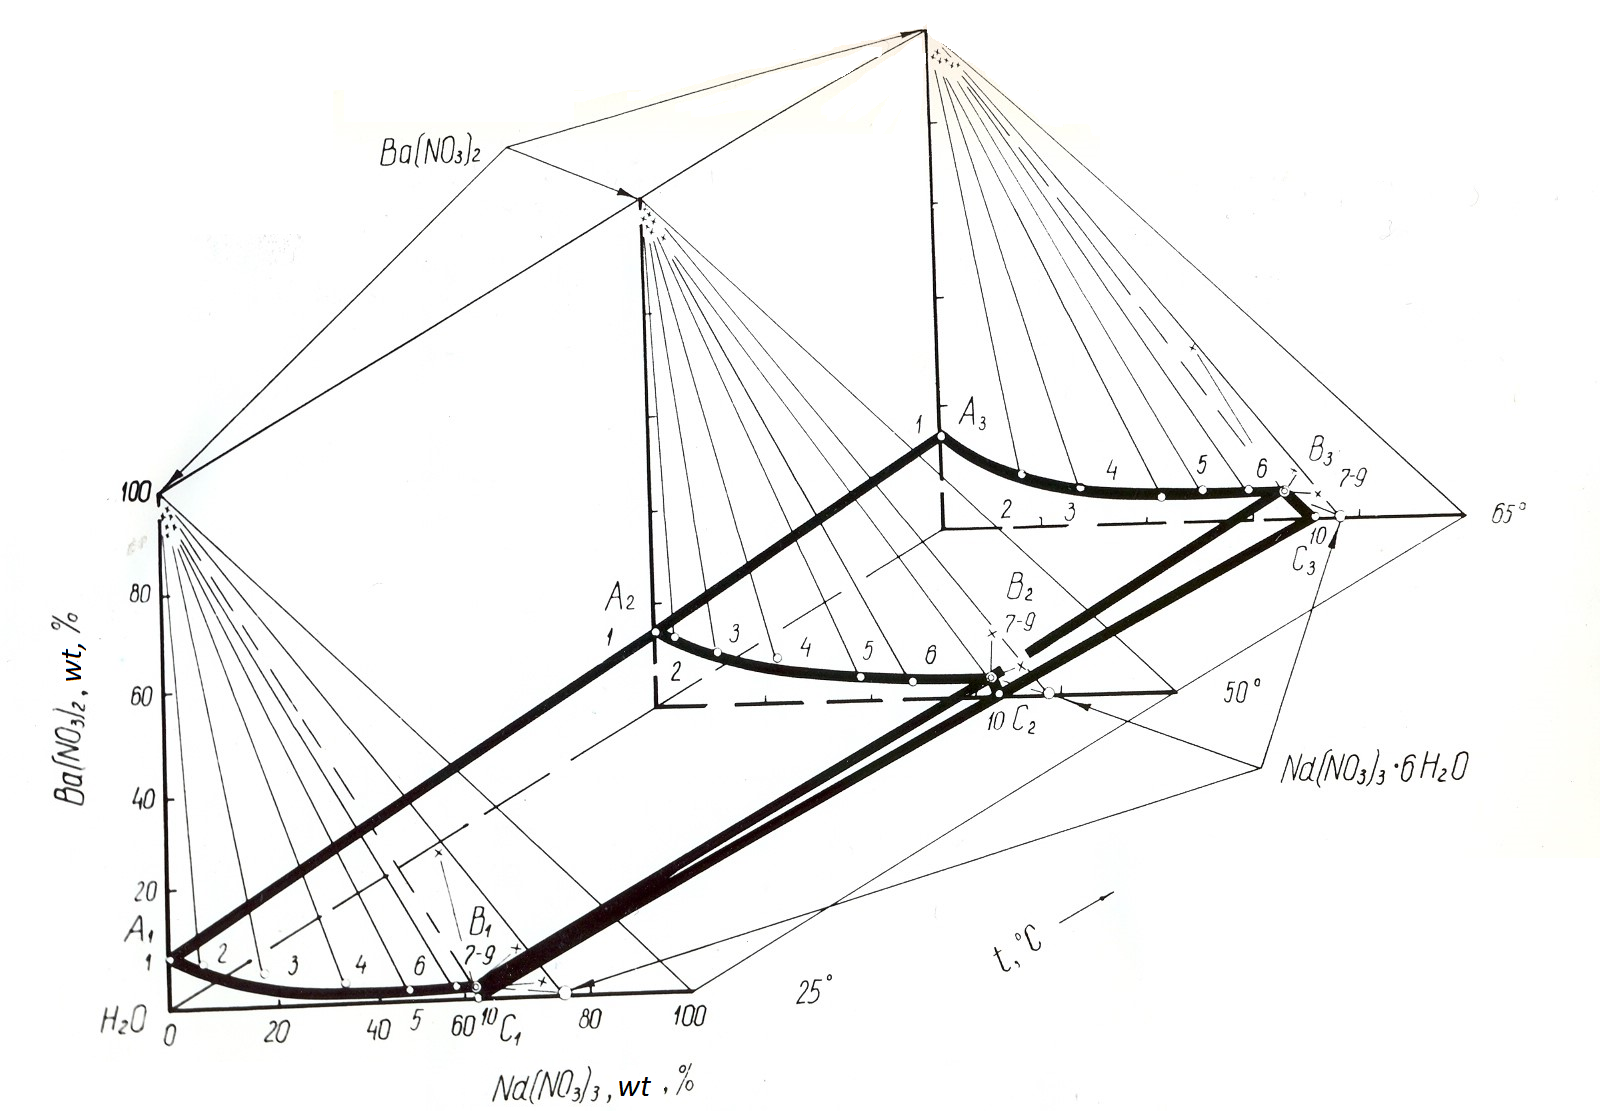


Fig. 4. Polytherm solubility of the system Ba(NO3)2 – Nd(NO3)3 – H2O at 25–65 оС


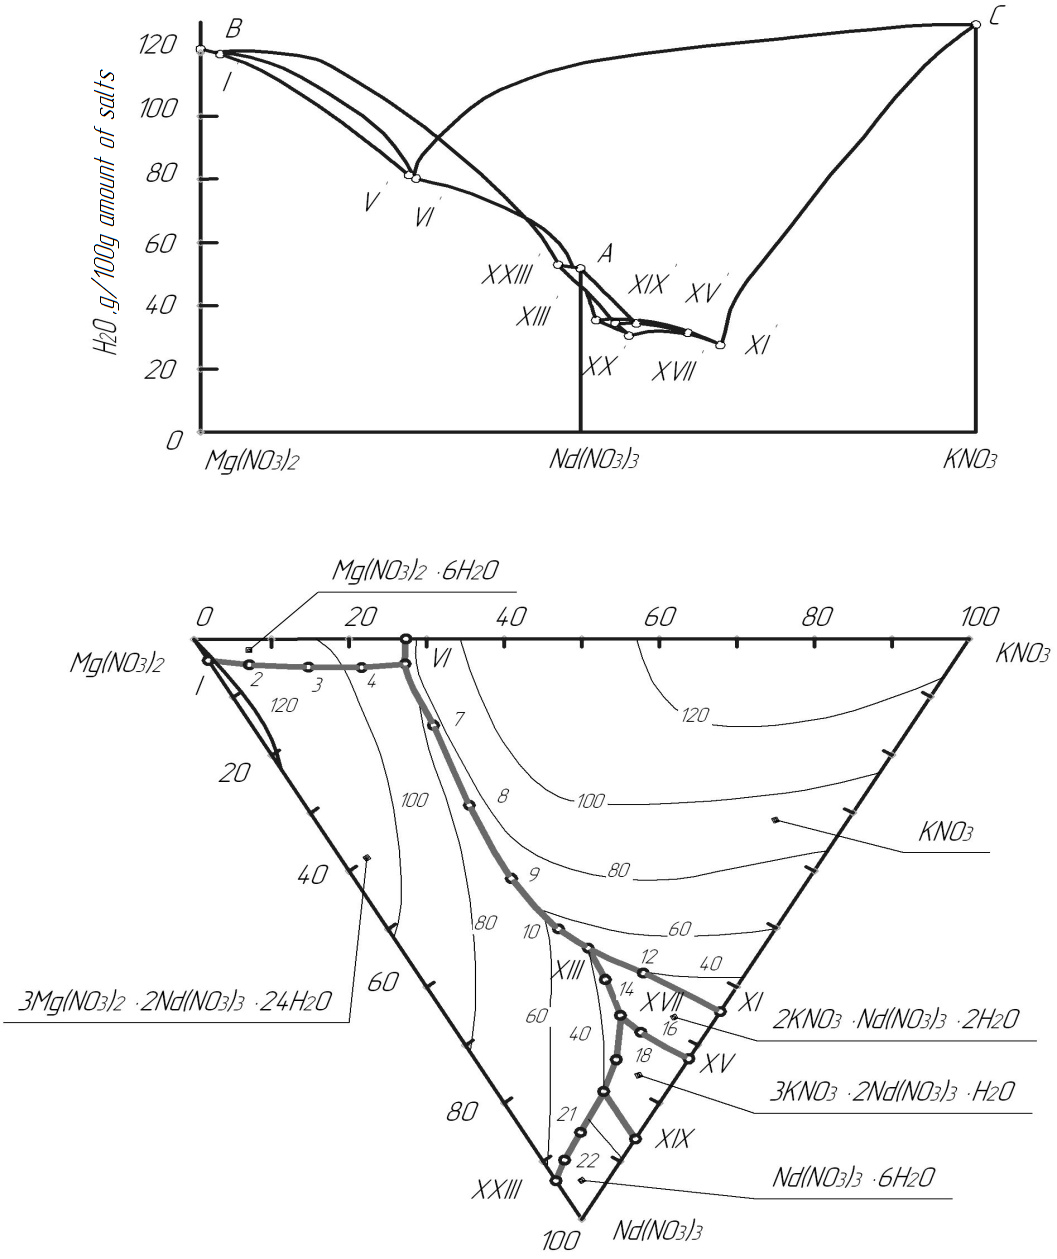


Fig. 5. Horizontal projections of the system solubility isotherms KNO3 – Mg(NO3)2 – Nd(NO3)3 – H2O in 50 оС

| 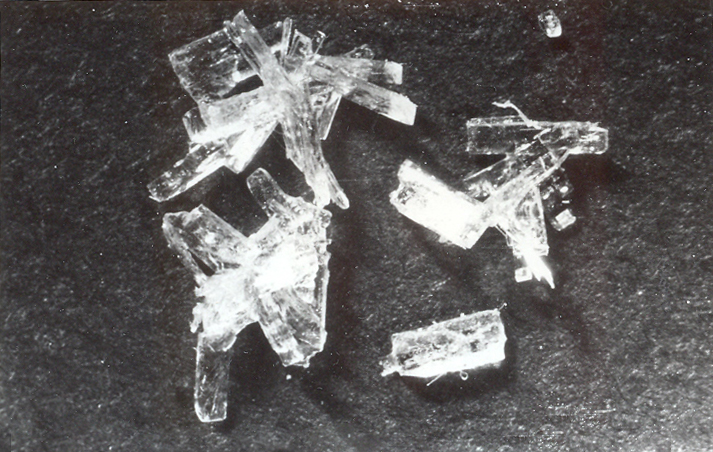  a) |  | 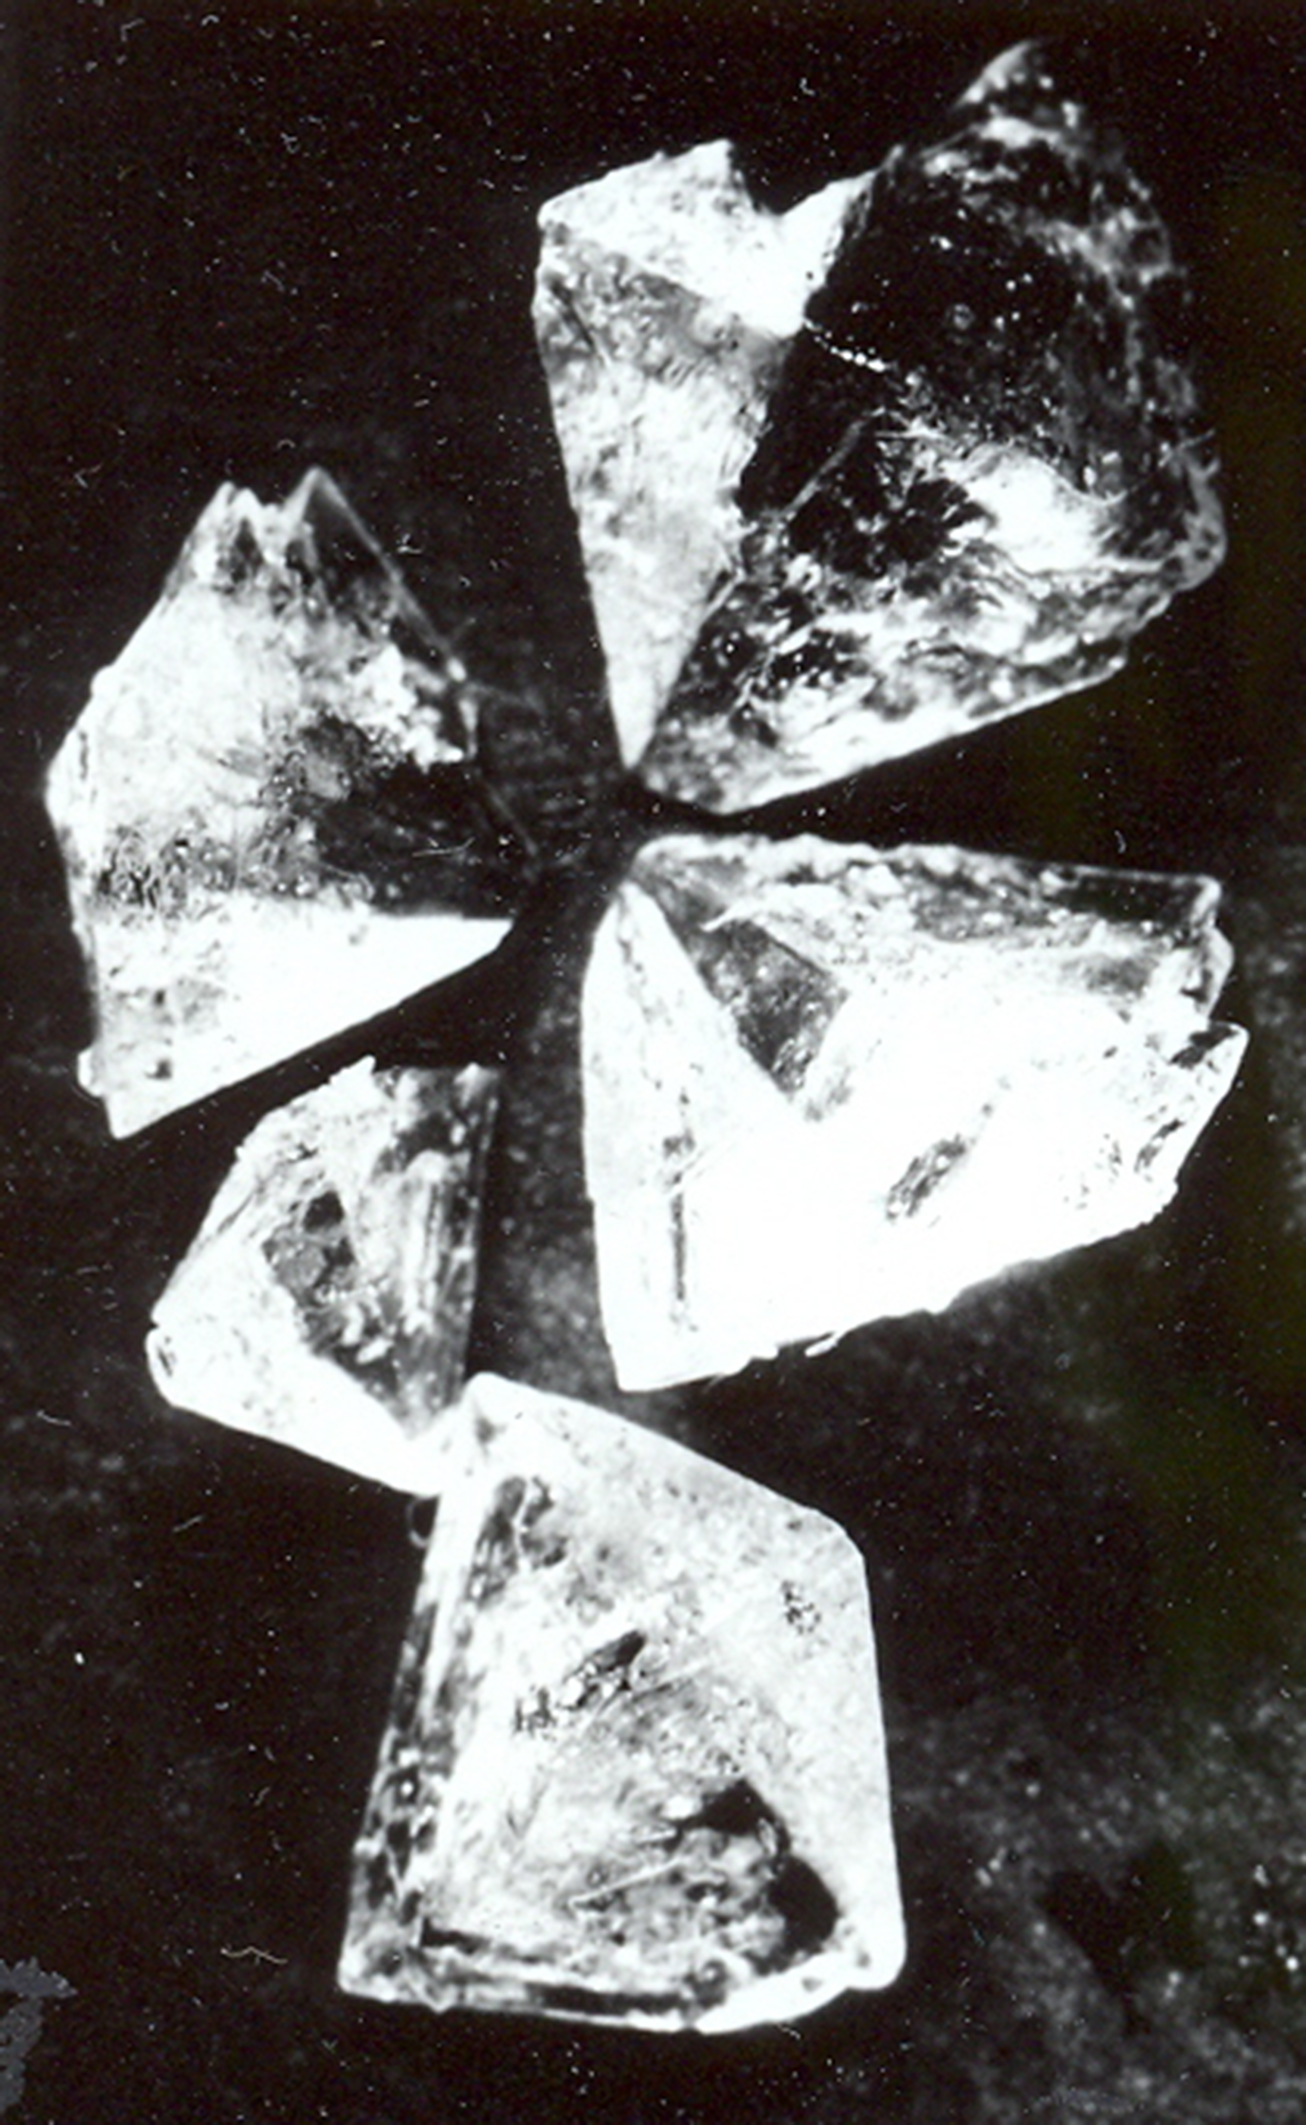  b) | 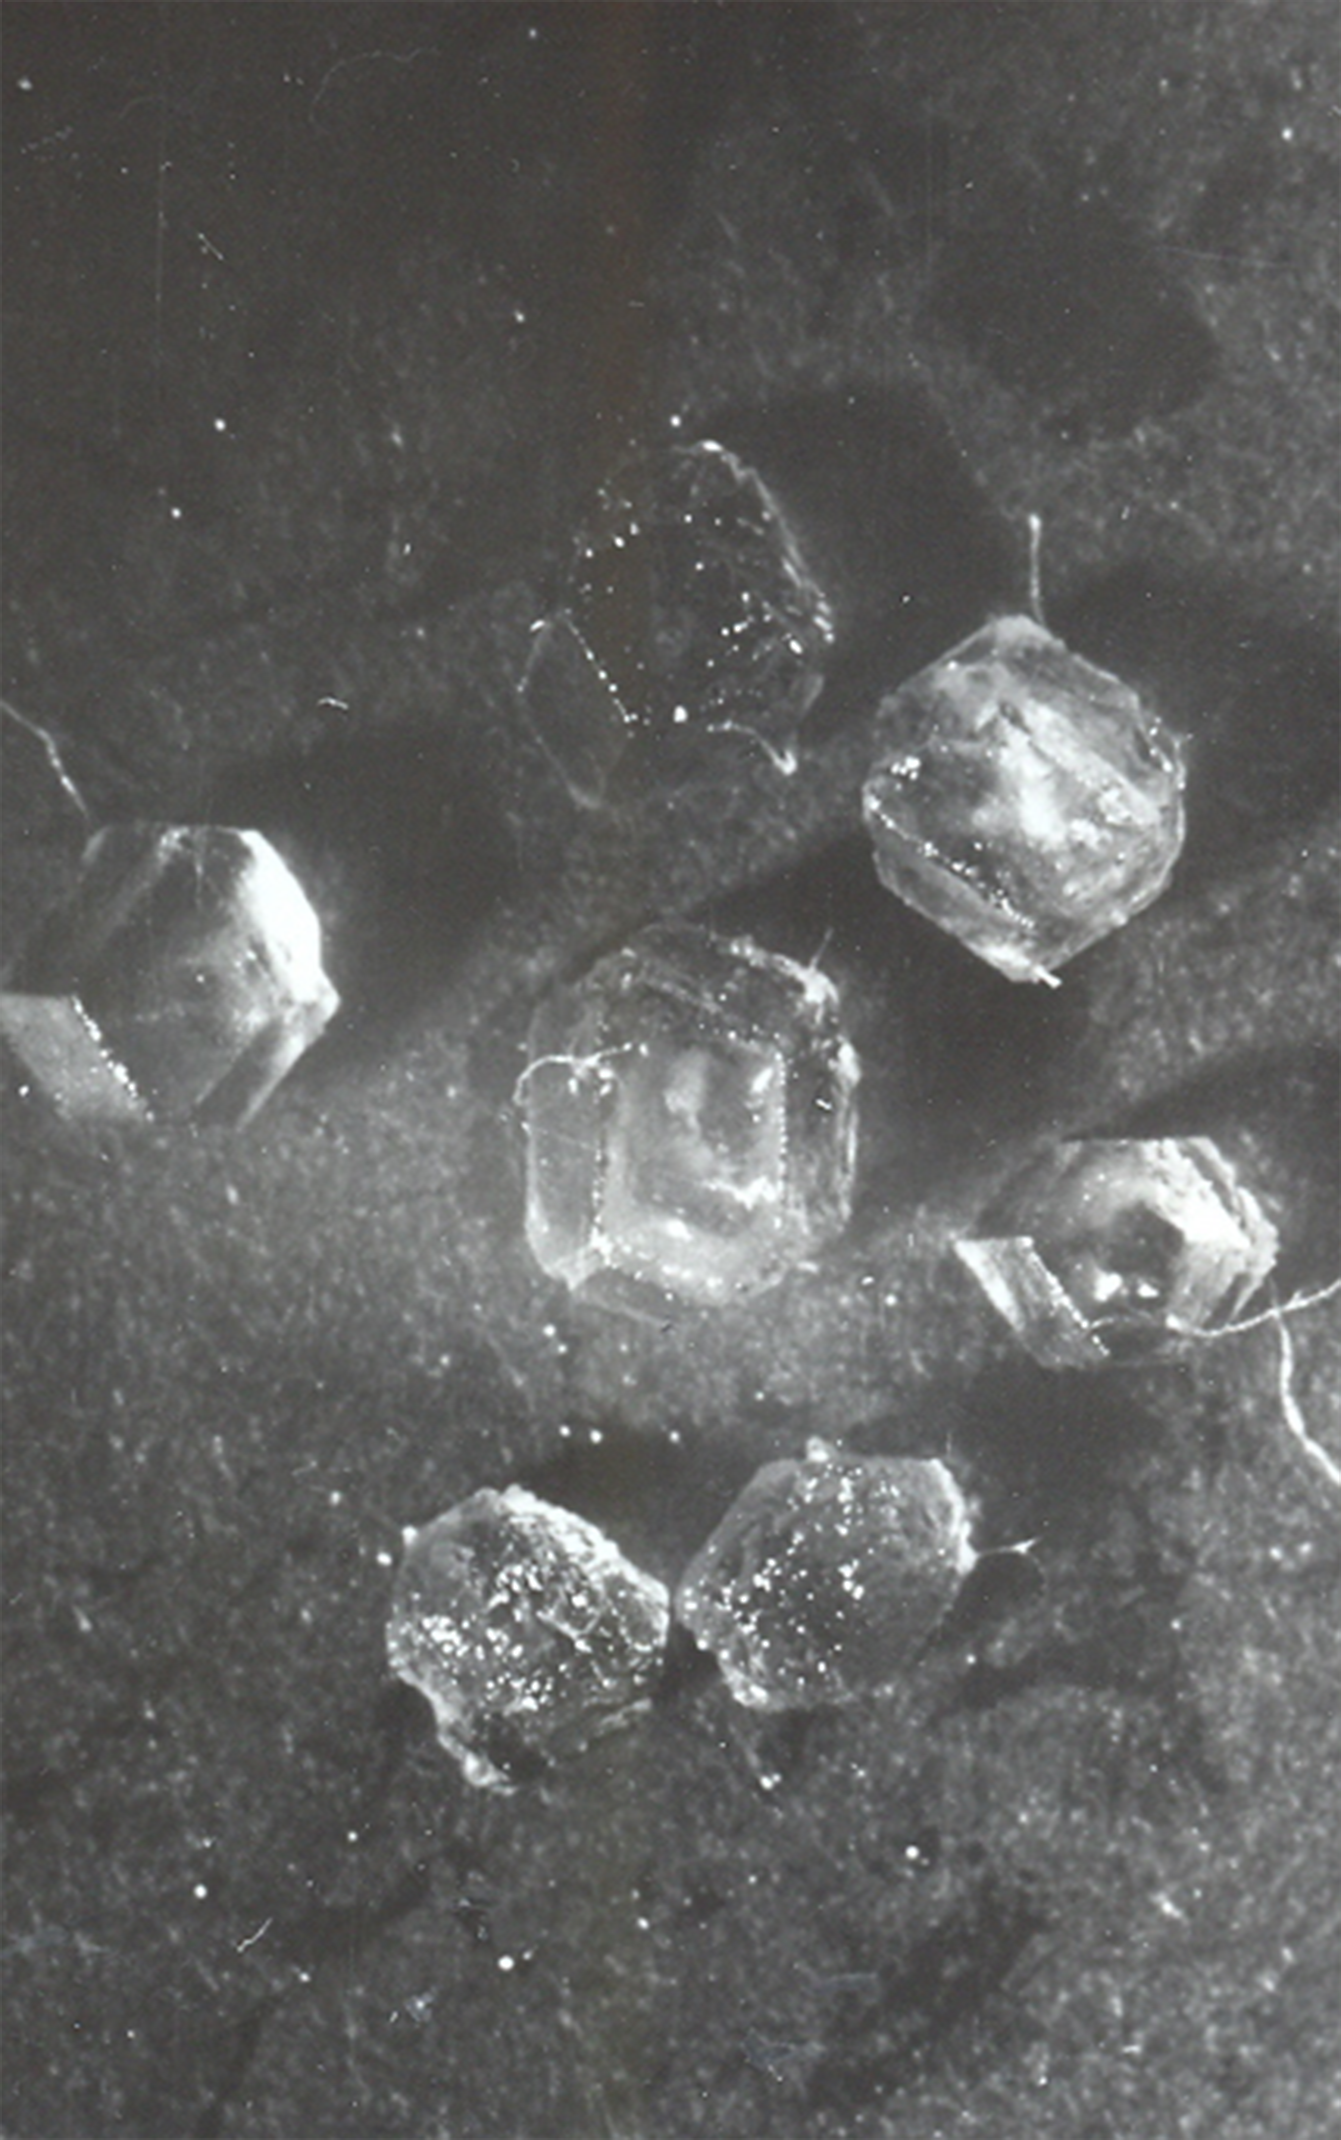  c) |  |
| --- | --- | --- | --- | --- |
| 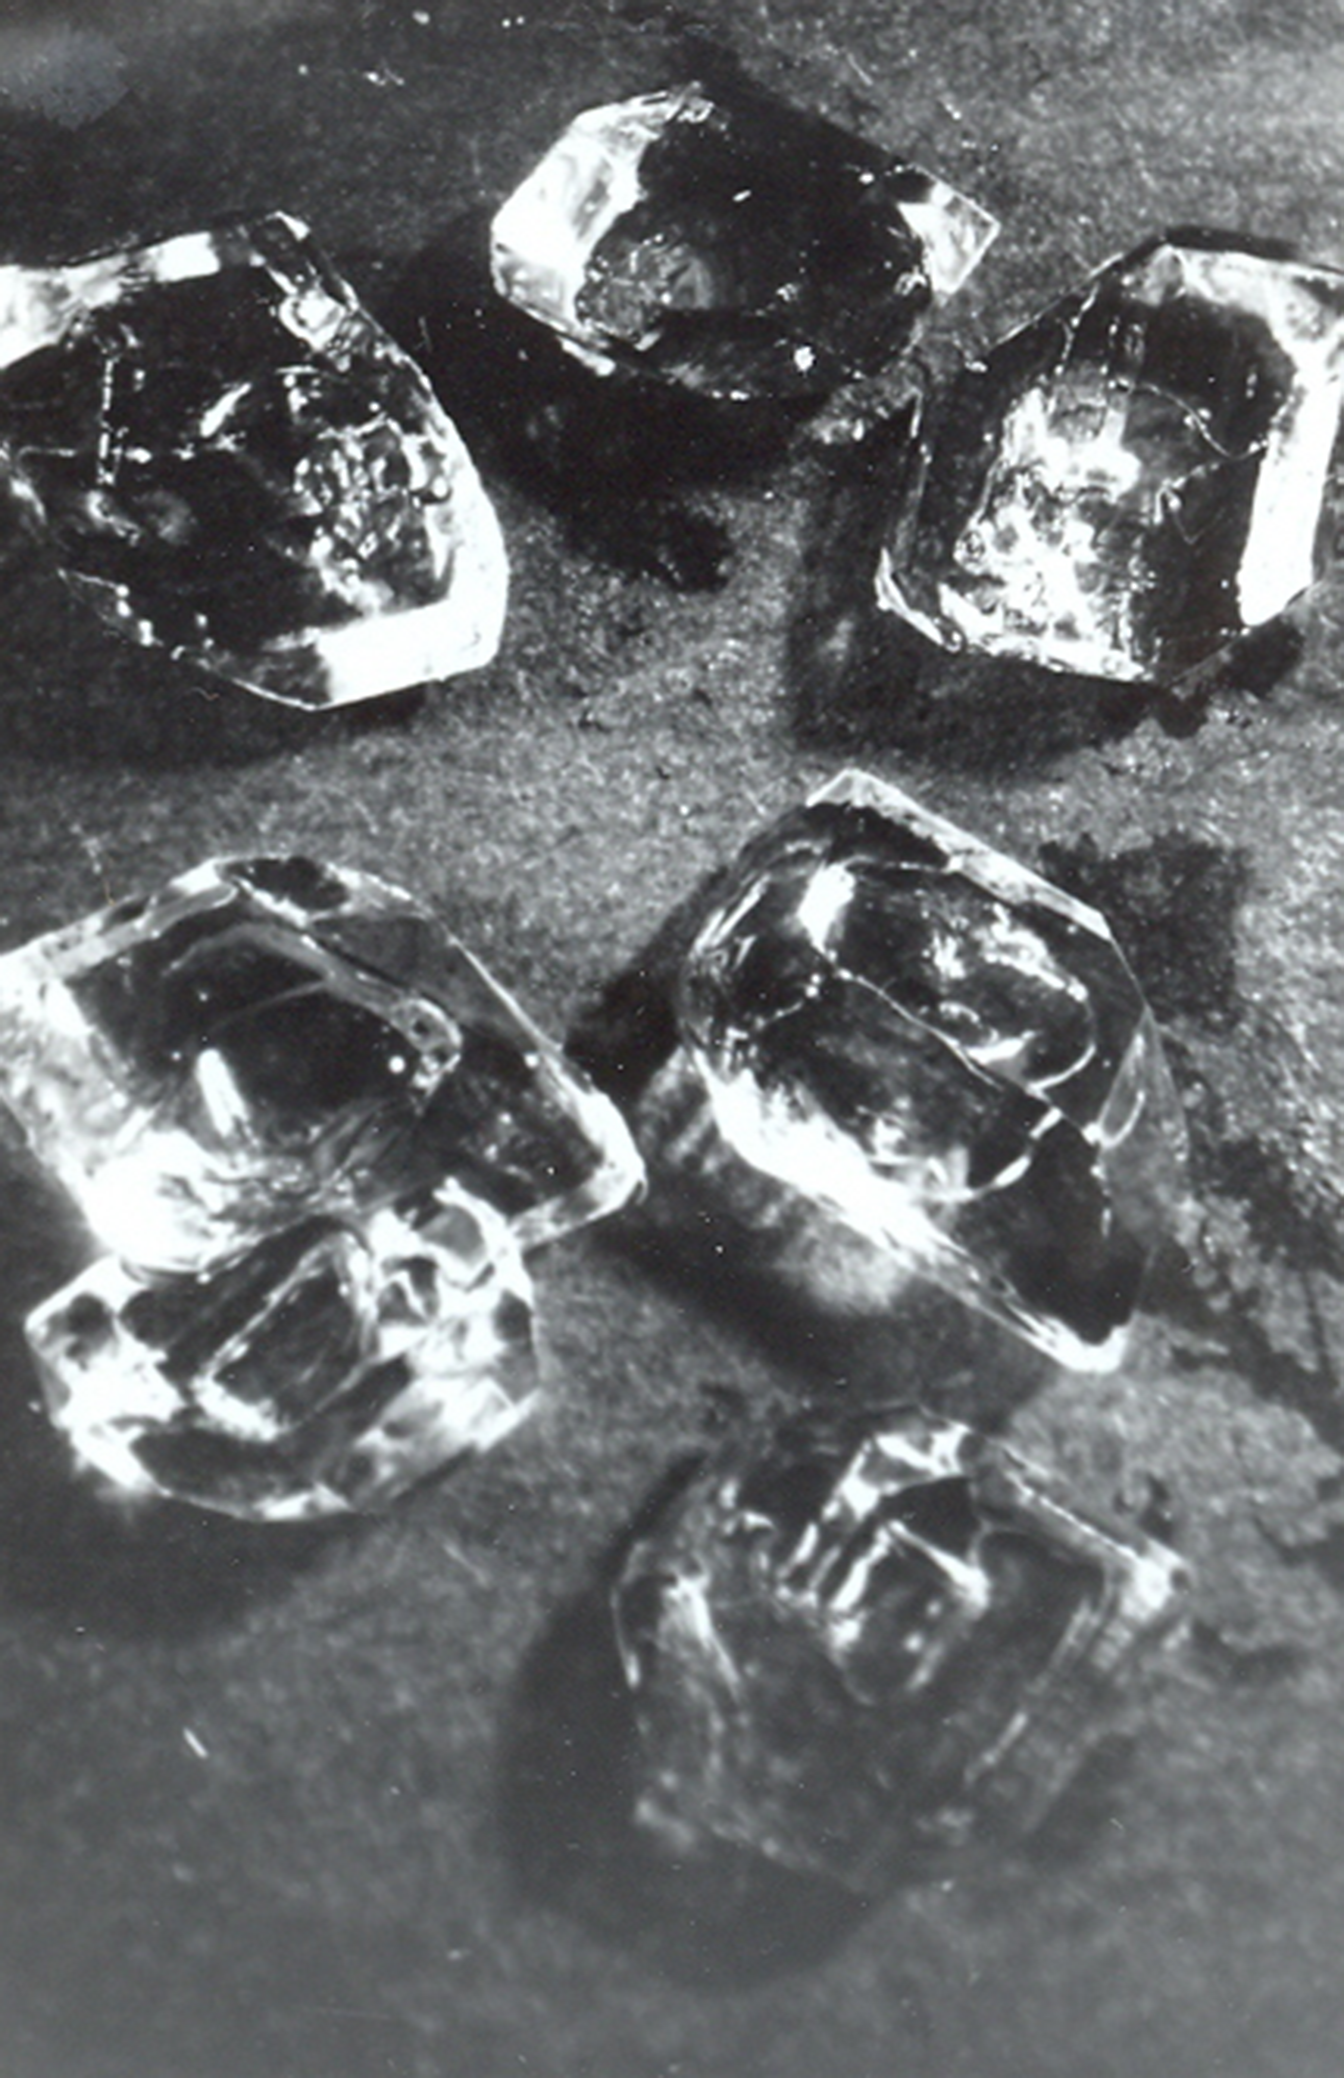  d) | 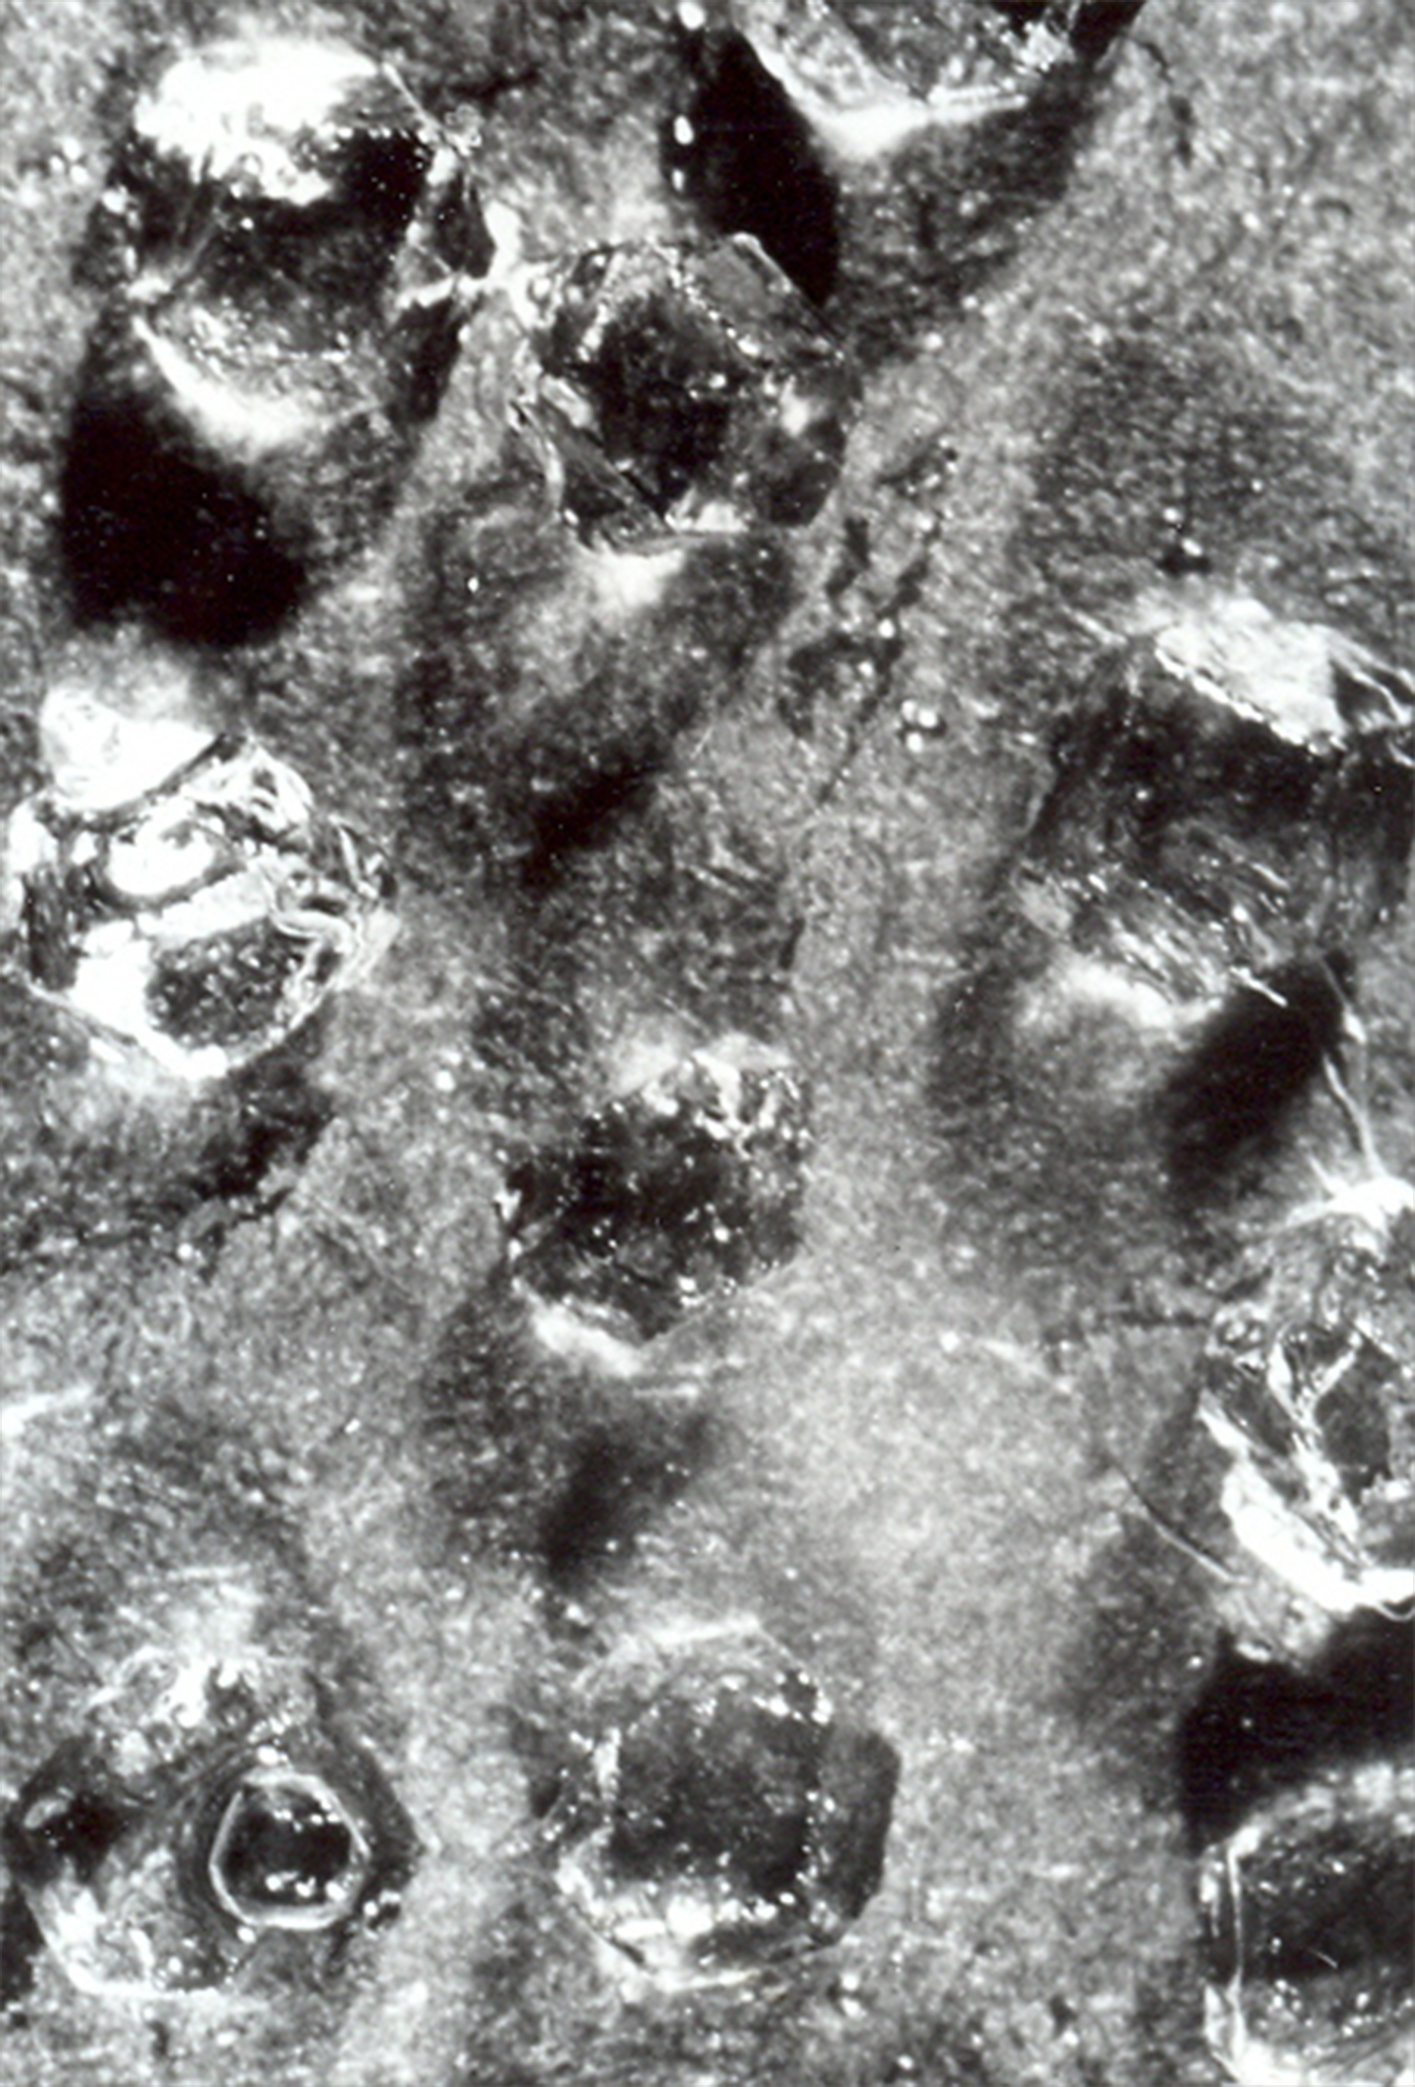  e) | 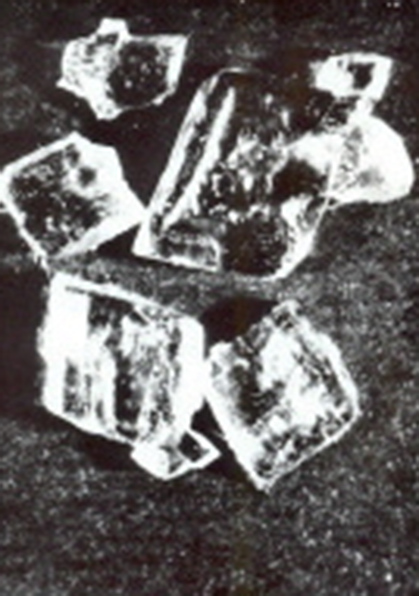  f) | 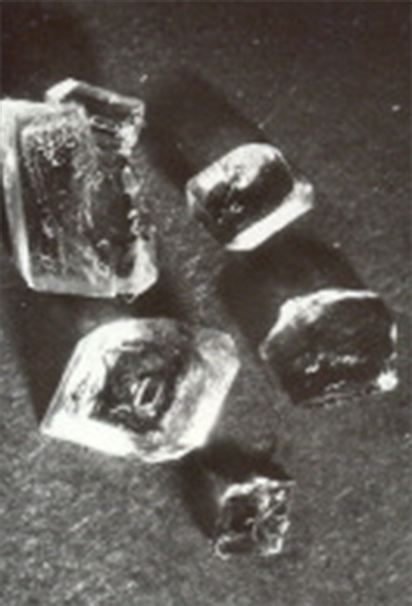  g) | 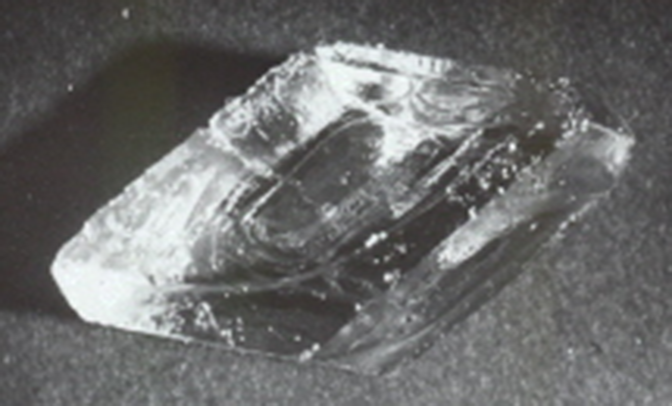  i)  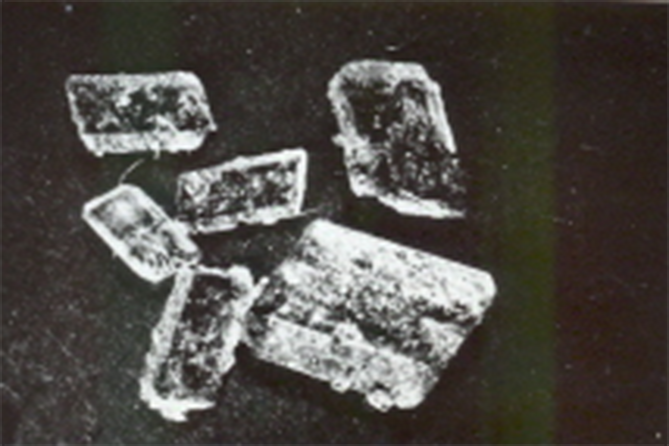  h) |

Fig. 6. Microphotos of coordination nitrates crystals Ln:

a) Na2[Nd(NO3)5]∙H2O; b)  K2[Nd(NO3)5(H2O)2] , c)  K3[Nd2(NO3)9]∙H2O;
d)  Rb5[Nd2(NO3)11]∙H2O, e)  Rb3[Nd2(NO3)9]∙H2O; f) Cs2[Nd(NO3)5(H2O)2] (tsynthesi. – 50 oC), g) Cs2[Nd(NO3)5(H2O)2] (tsynthesi. – 100 oC); h) Cs[Nd(NO3)4(H2O)3] (tsynthesi. – 50 oC), i) Cs[Nd(NO3)4(H2O)3] (tsynthesi. – 65 oC)


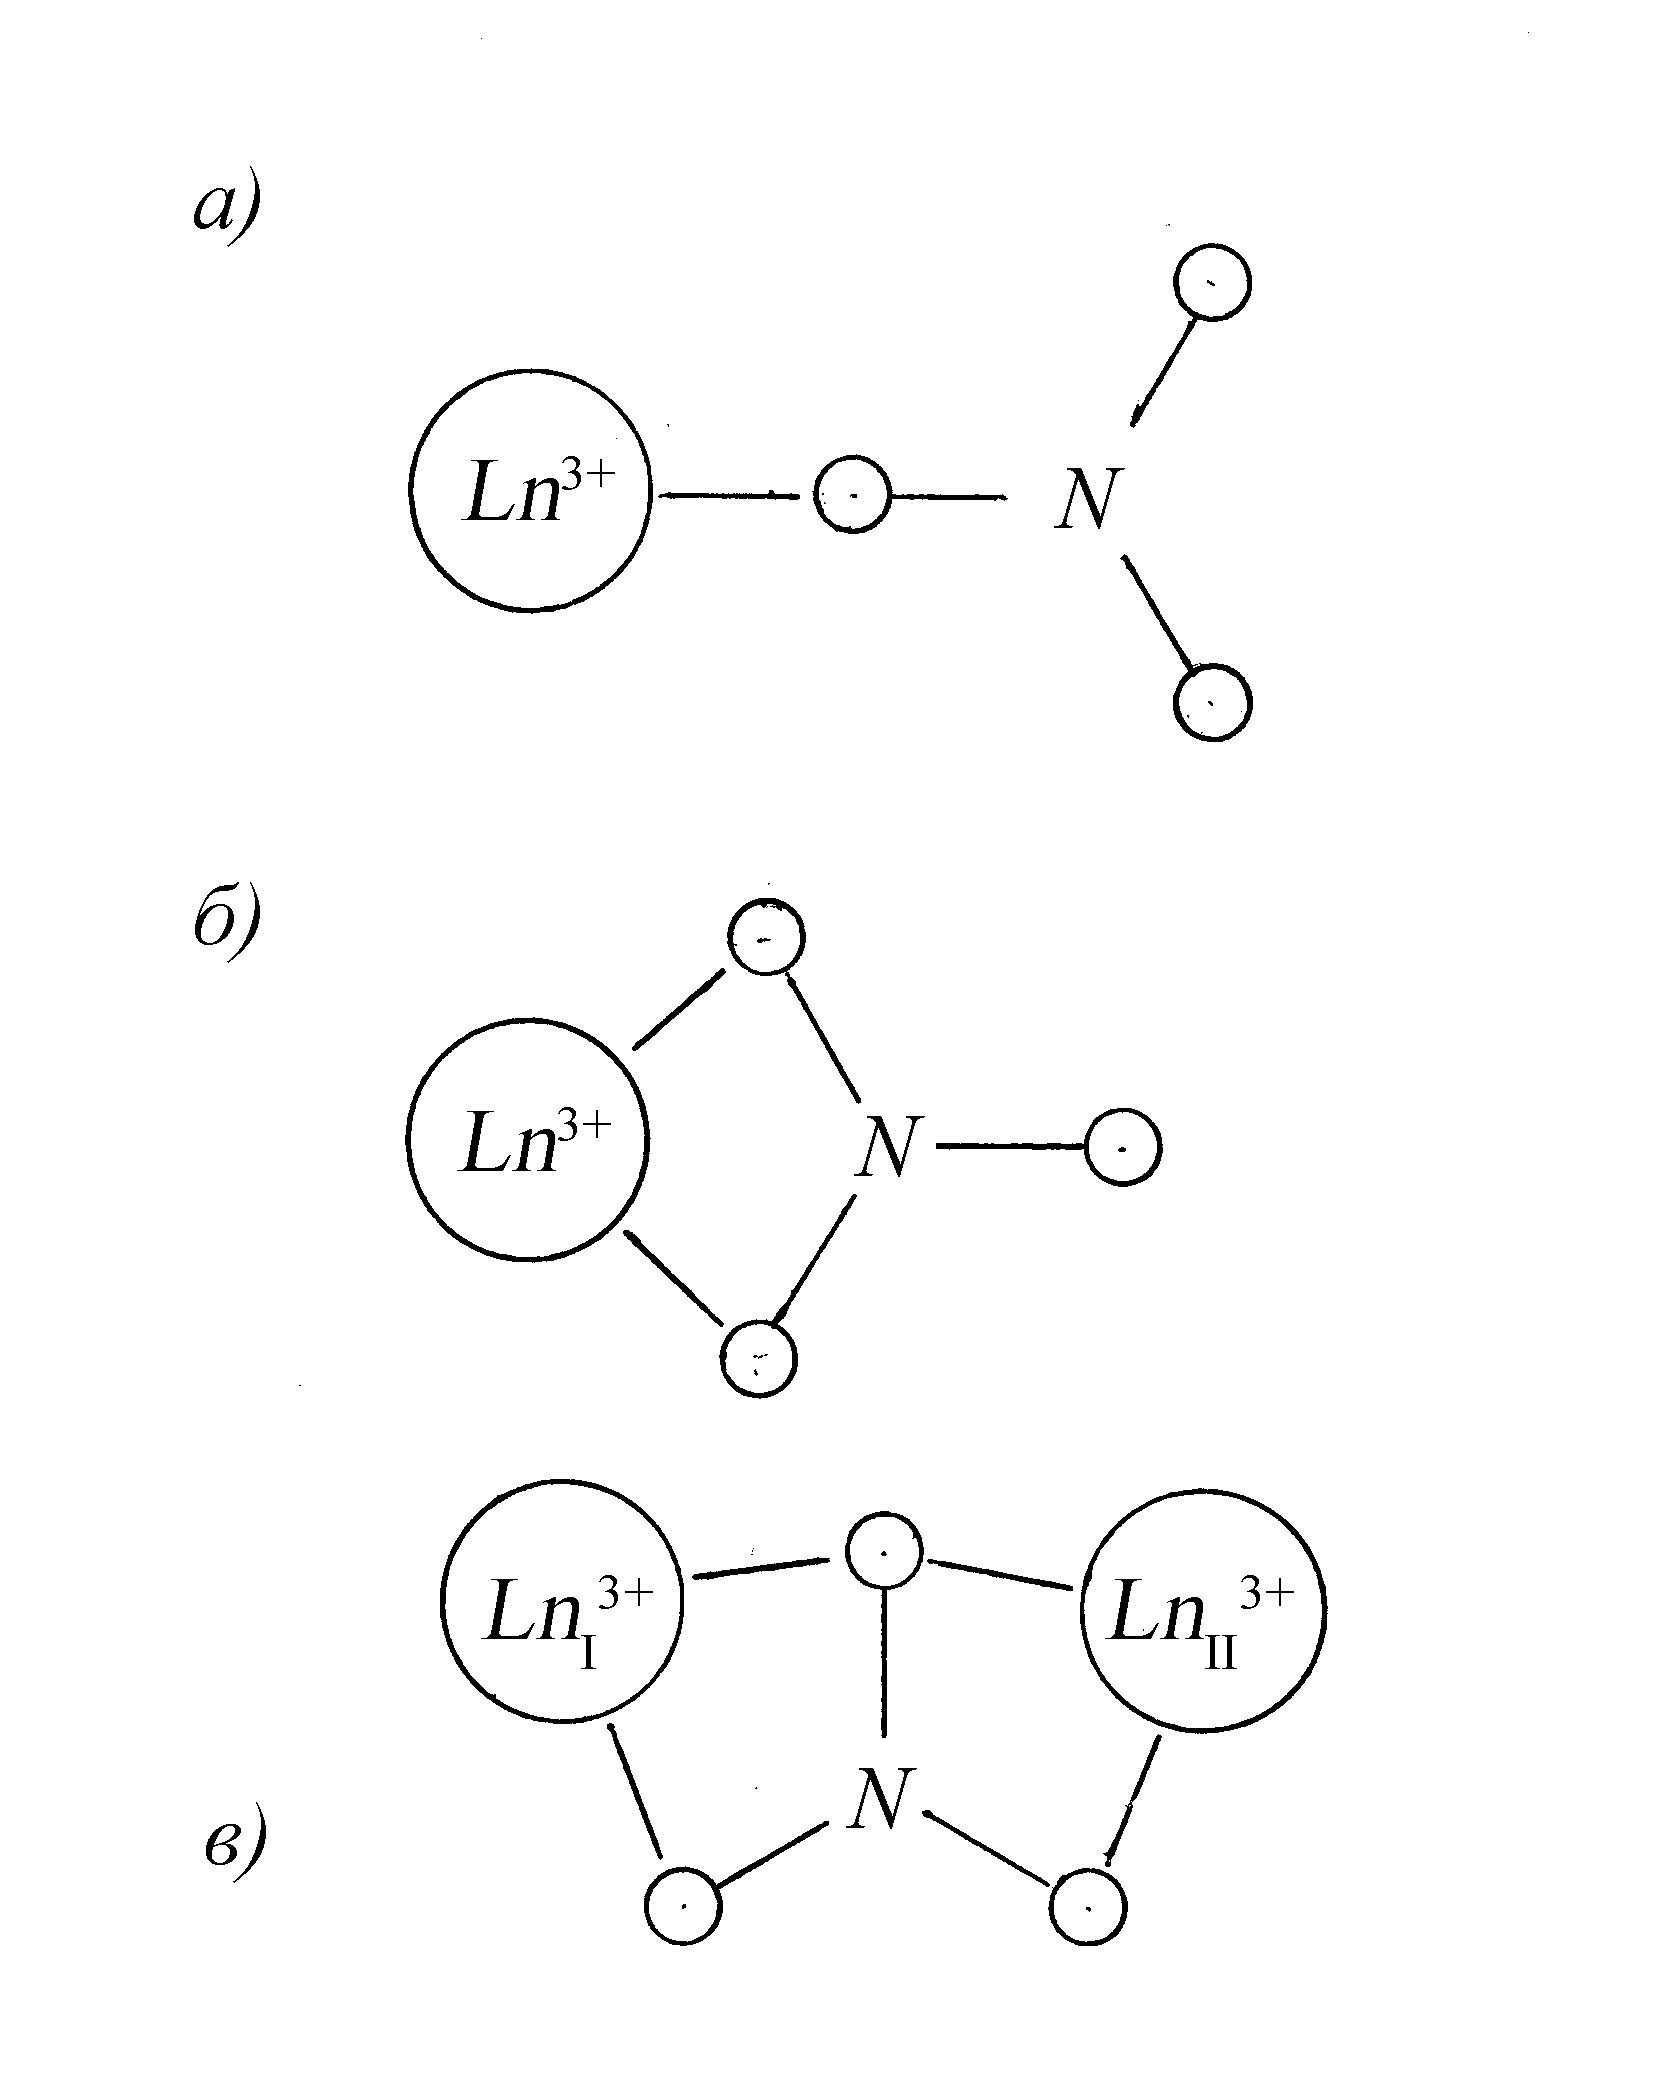

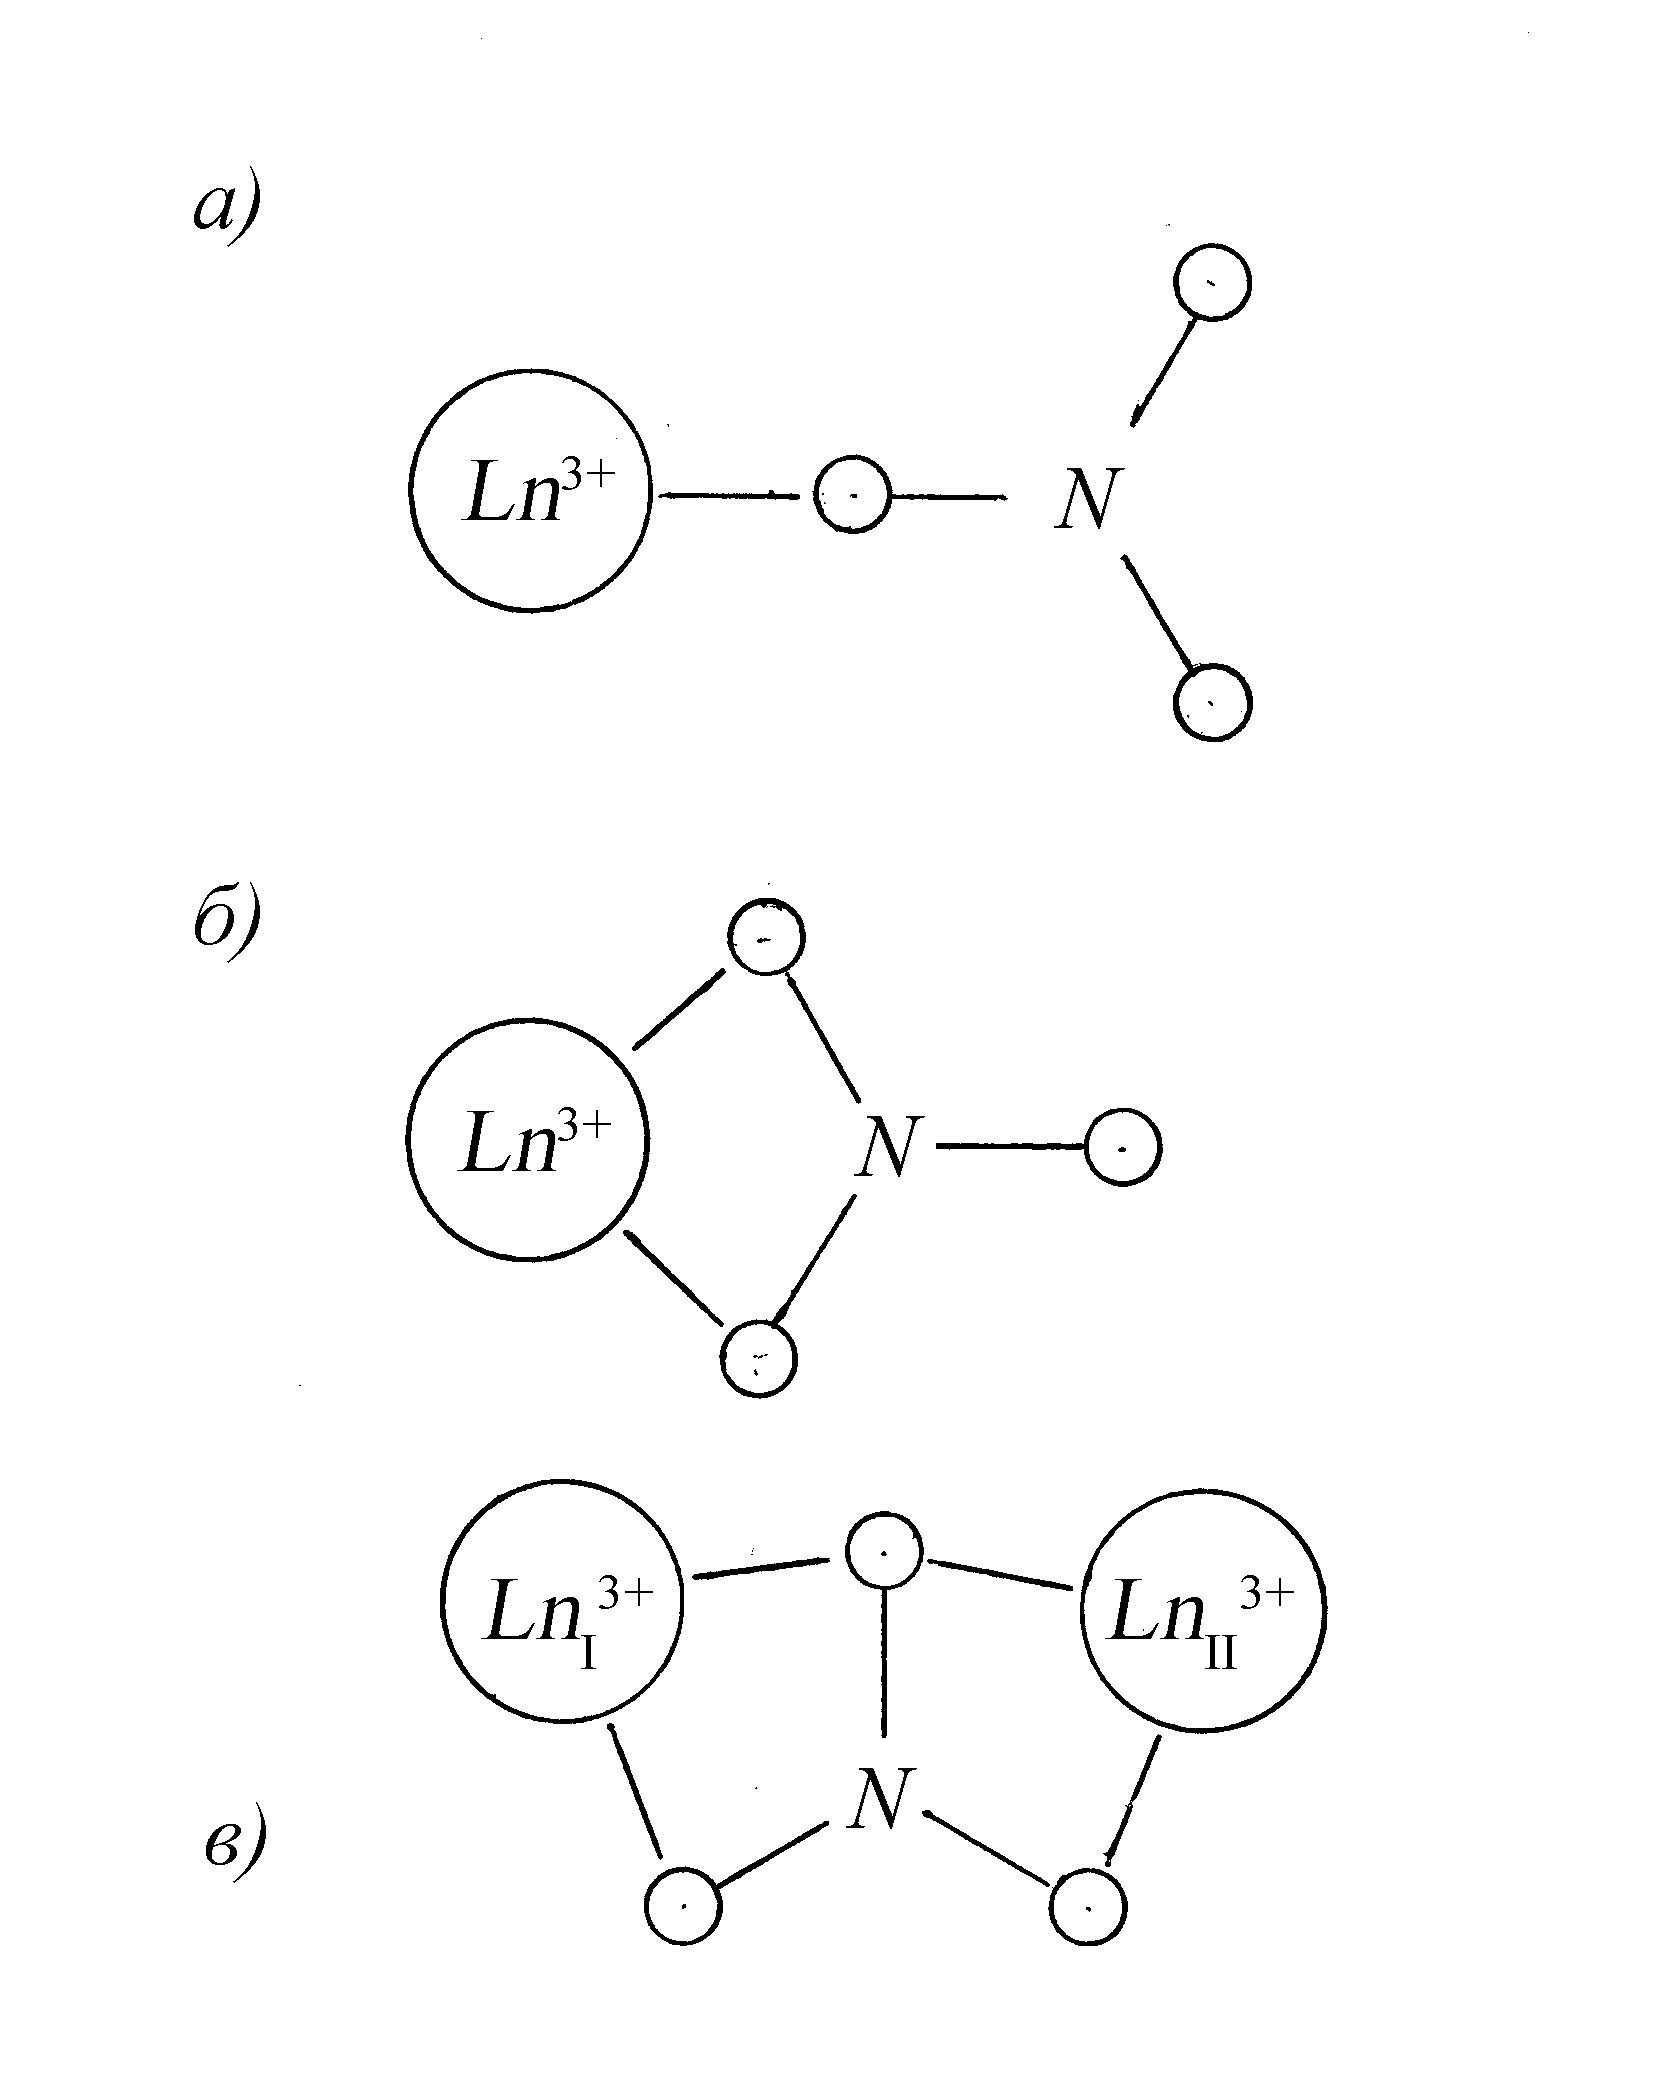

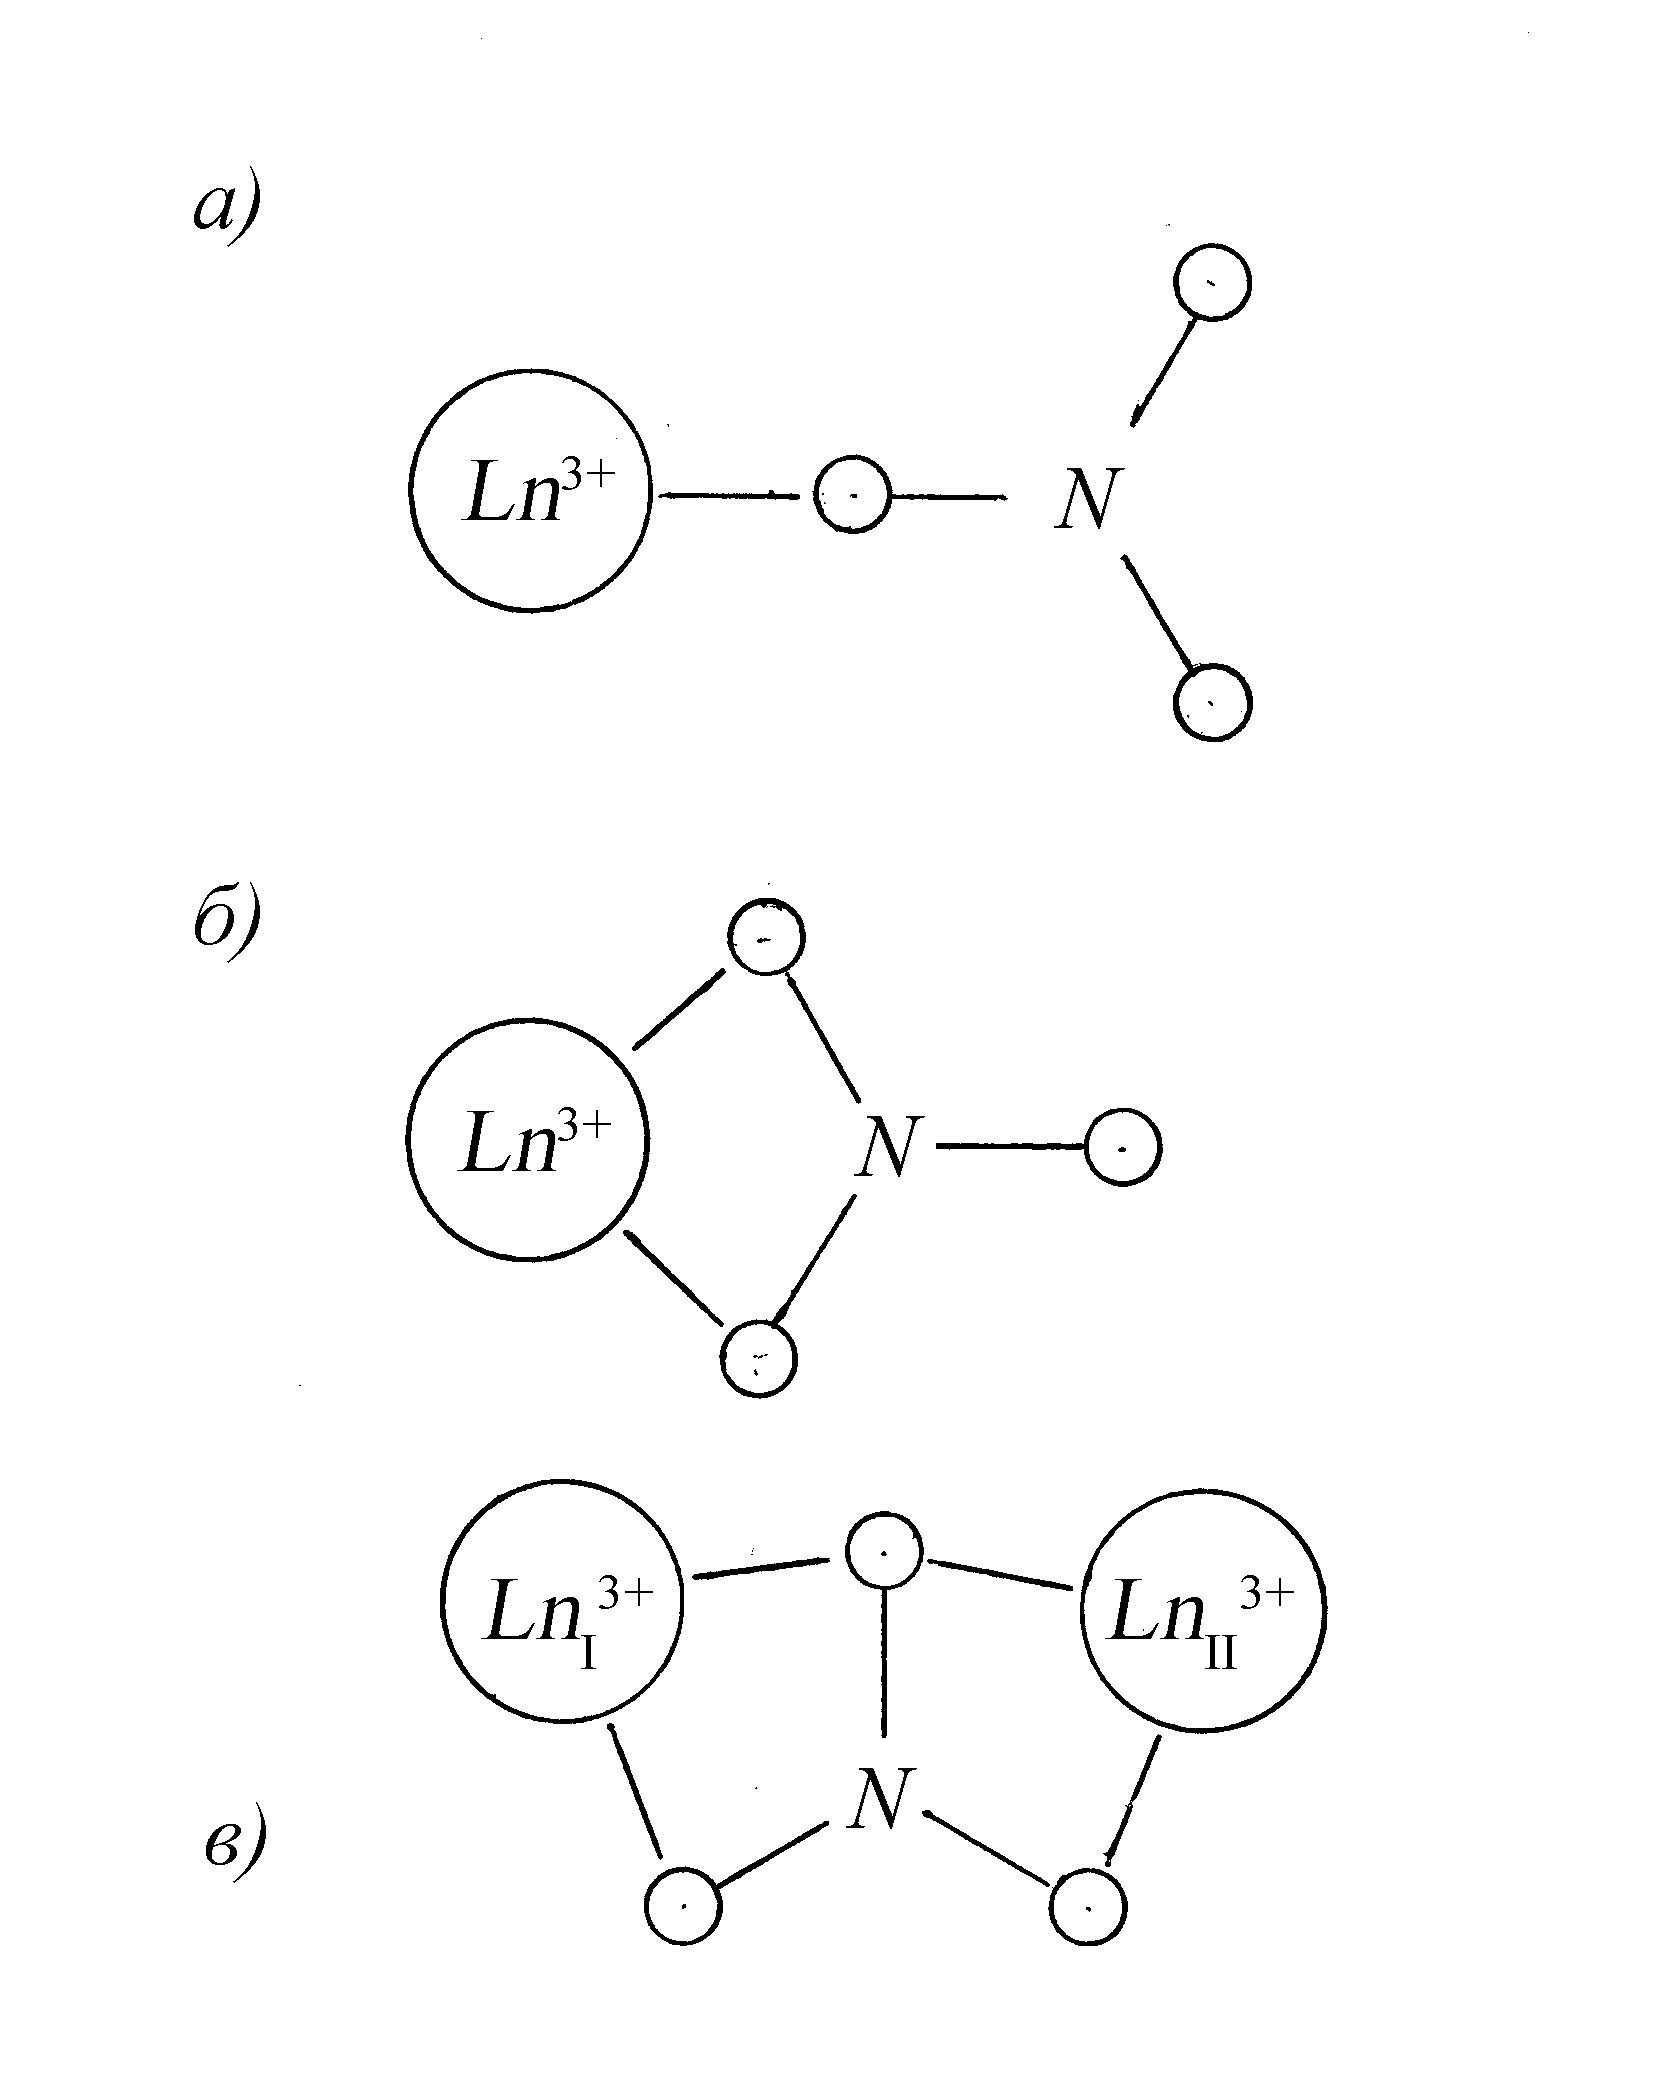


a b c

Fig. 7. – Three types of coordinating by nitrate groups lanthanides in coordination nitrates structures:
а) monodentate; b) symmetrical bidentate; c) symmetrical bridge bidentate


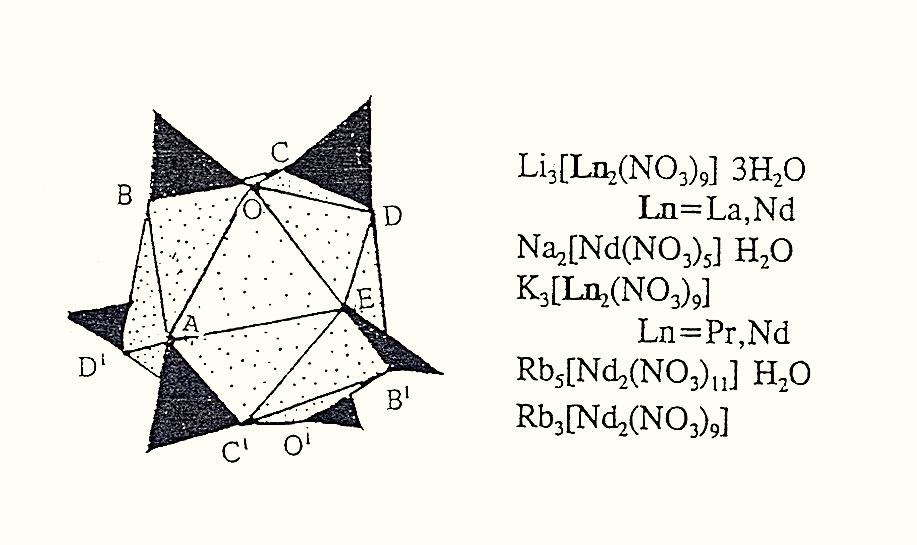


Fig. 8. Schematic image and general view of Ln-icosahedra, found in the structures of coordination nitrates of REE of cerium subgroup and elements of IA groups of periodic system


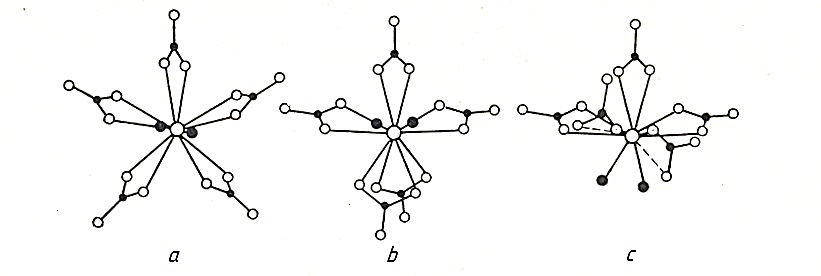


Fig. 9. Schematic representation of the coordination environment of atoms of rare-earth elements in structures (NH4)2[La(NO3)5(H2O)2]·H2O (а), K2[La(NO3)5(H2O)2] (b), Cs2[Nd(NO3)5(H2O)2] (c). Black circles – oxygen atoms of water molecules. Dice lines on rice in Fig. 9 (c) – unrealized bundles O-Nd.


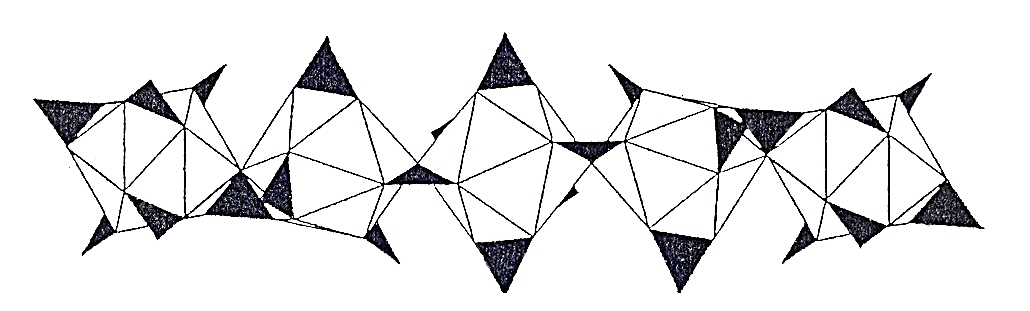


Fig. 10. A chain of neodymium polyhedrons in the structure Na2[Nd(NO3)5]·H2O
